# Supplementary material for: Lineage-Specific Expansions and Contractions of the Bitter Taste Receptor Gene Repertoire in Vertebrates
Source: Oxford University Press journal article supplement (doi:10.1093/molbev/msj106), 2006-02-16
Supplement: msj106_Supplementary_Data.zip [file msj106_Supplementary_Data.zip]

Archive with 2 entries (2 files):
- msj106suppfig2.pdf
- msj106suppfig1.pdf
