# Supplementary material for: Lineage-Specific Expansions and Contractions of the Bitter Taste Receptor Gene Repertoire in Vertebrates
Source: Oxford University Press journal article supplement (doi:10.1093/molbev/msj106), 2006-02-16
Supplement: msj106_Supplementary_Data.zip [file msj106_Supplementary_Data.zip › msj106suppfig2.pdf]

>Hosa-T2R1

ATGCTAGAGTCTCACCTCATTATCTATTTCTTCTTGCAGTGATACAATTTCTTCTGGGATTTTCACAAATGGCATCAT  
TGTGGTGGTGAATGGCATTGACTTGATCAAGCACAGAAAAATGGCTCCGCTGGATCTCCTCTTTCTTGTCTGGCAGTTT  
CTAGAATTTTCTGCAGTTGTTTCATCTTCTACGTTAATGTGATTGTTATCTTCTTCATAGAATTCATCATGTGTTCTGCG  
AATTGTGCAATTCCTTATTTATAAATGAATTGGAACCTTGGCTTGCACATGGCTCGCGTTTTCTATTGTGCCAAGGT  
TGCCAGCGTCCGTCAACCACTCTTCATCTGTTGAAGATGAGGATATCCAAGCTGGTCCCATGGATGATCCTGGGGTCTC  
TGCTATATGTATCTATGATTTGTGTTTTCCATAGCAAAATATGCAGGTTTATGGTCCCATCTTCTTAAGGAAATTTTTC  
TCCCAAAATGCCACAATCAAAAAGAAGATACACTGGCTATACAGATTTTCTTTTTGTTGCTGAGTTCTCAGTGCCATT  
GCTTATCTTCTTTTTGCTGTTTTGCTCTTGATTTTCTCTCTGGGGAGGCACACCCGGCAATGAGAAACACAGTGGCCG  
GCAGCAGGGTTCCTGGCAGGGGTGCACCCATCAGCGCTTGCTGTCTATCCTGTCTTCTGATCCTCTACTTCTCCAC  
TGCATGATAAAAGTTTTCTCTCTTCTCTAAAGTTTACATCAGAAGGTTTCTCTTCTGTTCTTCATCCTTGATTGG  
TATATACCCTTCTGGACACTCTCTCATCTTAATTTAGGAAATCCTAAATTGAAACAAAATGCAAAAAGTTCCTCTCTC  
ACAGTAAGTGCTGCAGTGA

>Hosa-T2R2p

ATGTCAAGCAGAATTTCTCACAGGGATCACAGTAAATGGATTTCTTATCATTGTTAACTGTAATGAATTGATCAACATAG  
AAAGCTAATGCCAATTCAAATCCTCTTAATGTGCATAGGGATGTCTAGATTTGGTCTGCAGATGGTGTAAATGGTACAAA  
GTTTTTCTCTGTGTTCTTCCACTCCTTACGTCAAAATAATTTATGGTGCAGCAATGATGTTCTTTGGATGTTTTT  
AGCTCTATCAGCCTATGGTTTGCACCTTGCTTTCTGTATTTACTGCCTCAAGATTTCAAGGCTTCACTCAGTCTGTTT  
TCTTTGGTTGAAATTCAGGATCCCAAAGTTAATACCTTGCTGCTTCTGGGAAGCGTTCTGGCCTCTGTGAGCATTGCAT  
CTGTGTGTCGAGGTAGATTACGCTAAAAATGTGGAAGAGGATGCCCTCAGAAACACCACACTAAAAAGAGTAAAAACAA  
GATAAAGAAAATAGTGAAGTGCTTCTGTCAACTTGGCATTAAATTTCTCTAGCCATATTTGTGATGTGCACTTCTA  
TGTTACTCATCTCTTTACAAGCACACTCATCGGATGCAACATGGATCTCATGGCTTTAGAAATGCCAACACAGAAGCC  
CATATAAATGCATTAATAACAGTGATAACATTTCTTTGCTTCTTATTTCTTATTTTGGTGCCTTCATGACAAATATGAC  
ATTTAGTTTACCTTACAGAAGTCACCAAGTTCTTTATGCTGAAGGACATAATGGCAGCATATCCCTCTGGCCACTCGGTTA  
TAATAATCTTGAGTAATCTAAGTTCCAACAATCATTTAGAAGAATTCTCTGCCTCAAAAAGAACTATGA

>Hosa-T2R3

ATGATGGGACTCACCGAGGGGTGTTCTGATTCTGTCTGGCACTCAGTTTCACTGGGAATTCTGGTCAATTGTTTCAT  
TGAGTTGGTCAATGGTAGCAGCTGGTTCAAGACCAAGAGAATGTCTTTGCTGACTTCATCATACCACCCTGGCACTCT  
TGAGGATCATTCTGCTGTGATTATCTTGACTGATGTTTTTAATAGAATTCCTCCCAACACACATGATTAGGGATA  
ATAATGCAAATTATTGATGTTTCTGGACATTTACAACCATCTGAGCATTGGCTTGCACCTGTCTTGGTGTCTCTA  
CTGGCTGAAAATCGCCAGTTTCTCTCACCCACATTCCTCTGGCTCAAGTGAGAGTTTCTAGGGTGATGGTATGGATGC  
TGTTGGGTGCACTGCTCTTATCTGTGGTAGTACCGCATCTCTGATCAATGAGTTTAAAGCTCTATTCTGTCTTTAGGGGA  
ATTGAGGCCACCAGGAATGTGACTGAACACTTCAGAAAGAAGAGGAGTGAGTATTATCTGATCCATGTTCTTGGGACTCT  
GTGGTACCTGCCTCCCTAATTTGTGTCCTGGCCTCCTACTCTTGTCTCATCTTCTCCCTGGGGAGGCACACACGGCAGA  
TGCTGCAAAATGGGACAAGCTCCAGAGATCCAACCACTGAGGCCACAAGAGGGCCATCAGAATCATCCTTTCTTCTTC  
TTTCTCTTCTACTTTACTTTCTTGCTTCTTAATTTGCATCATTGGTAATTTCTACCAAAAACCAAGATGGCTAAGAT  
GATTGGCGAAGTAATGACAATGTTTTATCCTGCTGGCACTCATTTATTCTCATTCTGGGGAACAGTAAGCTGAAGCAGA  
CATTTGTAGTGATGCTCCGGTGTGAGTCTGGTCACTGAAGCTGGATCCAAGGGACCCATTTTCTCTTAG

>Hosa-T2R4

ATGCTTCGGTTATTCTATTTCTCTGCTATTATTGCCTCAGTTATTTTAAATTTGTAGGAATCATTATGAATCTGTTTAT  
TACAGTGGTCAATTGCAAACTTGGGTCAAAAGCCATAGAATCTCCTCTTGATAGGATTCTGTTACGCCTGGGCATCA  
CCAGGTTTCTTATGCTGGGACTATTTCTGGTGAACACCATCTACTTCGTCTCTTCAAATACGAAAGGTCAGTCTACCTG  
TCTGCTTTTTTGTGTTGTGTTTCATGTTTTGGACTCGAGCAGTGTCTGGTTGTGACCTTGCTCAATATCTTGACTG  
TGTGAAGATTACTAATCTCAACACTCAGTGTCTCCTGCTGAAGCGGAATATCTCCCAAGATCCCAGGCTGCTGC  
TGGCCTGTGTGCTGATTTCTGCTTTCACCACTTGCTGTACATCACGCTTAGCCAGGCATCACCTTTCTGAACCTGTG  
ACTACGAGAAATAACACATCATTTAATACAGTGAGGGCATCTGTCTTTAGTGGTTTCTTTGGTCTTGAGCTCATCTCT  
CCAGTTTCATTAATGTGACTTCTGCTTCTTGTCTAATACACTCCTTGAGGAGACATATACAGAAGATGCAGAAAAATG  
CCATGGTTTTCTGGAATCCCCAGACGGAAGCTCATGTAGGTGCTATGAAGCTGATGGTCTATTTCTCATCCTCATACATT  
CCATGTTTCAAGTGTACCTGGTCCAGTATCTCCCTTTTATGCAGGGATGGATATGGGGACCAATCCATTTGTCTGAT  
TTTTGCCACCCTTACTCTCCAGGACATTCTGTTCTCATTATTATCACACATCTAAACTGAAAACAACAGCAAGAAGA  
TTCTTTGTTTCAAAAATAG

>Hosa-T2R5

ATGCTGAGCGCTGGCCTAGGACTGCTGATGCTGGTGGCAGTGGTTGAATTTCTCATCGGTTTAAATTGGAATGGAAGCCT  
GGTGGTCTGGAGTTTTAGAGAATGGATCAGAAAATCAACTGGTCTCATATAACCTCATTATCCTGGGCCTGGCTGGCT  
GCCGATTTCTCCTGCAGTGGCTGATCATTTTGGACTTAAGCTTGTTCACCTTTCCAGAGCAGCCGTTGGCTTCGCTAT  
CTTAGTATCTTCTGGGCTCTGTAAGCCAGGCCAGCTTATGTTTGCACCTTCTCAGTGTCTTCTATTGCAAGAAGAT  
CACGACCTTCGATCGCCCGGCTACTTGTGGCTGAAGCAGAGGGCCTATAACCTGAGTCTCTGGTGCCTCTGGGCTACT  
TTATAATCAATTTGTACTTACAGTCCAAATTTGGCTTAACATTTCTATCATCTCCCCAAGGAAACAGCAGCATTGGGTAT  
CCCTTTGAAAGCTGGCAGTACCTGTATGCATTTAGCTCAATTCAGGAAGTTATTTGCCTTTAGTGGTGTCTTGTGTTT  
CTCTGGGATGCTGATTGTCTCTTGTATACACACCACAAGAAGATGAAGGTCCATTAGCTGGTAGGAGGGATGTCCGGG  
CCAAGGCTCATACACTCGCTGAAGTCTTGGGCTGCTTCTCTTACTTACCTGGTTTATATCATGGCCAGCCCTTC  
TCCATCACCTCCAAGACTTATCTCTGATCTCACCAGTGTCTCATCTGGGAGACACTCATGGCAGCCTATCCTTCTCT  
TCATTCTCTCATATTGATCATGGGGATTCTAGGGTGAAGCAGACTTGTGAGAAGATCCTGTGGAAGACAGTGTGTGCTC  
GGAGATGCTGGGGCCCATGA

>Hosa-T2R7

ATGGCAGATAAAGTGCAGACTACTTTATTGTTCTTAGCAGTTGGAGAGTTTTTCAGTGGGGATCTTAGGGAATGCATTCAT  
TGGATTGGTAAACTGCATTGGACTGGGTCAAGAAGAGGAAATTCCTCCATTGATTTAATCCTCACAAGTCTGGCCATAT  
CCAGAATTTGTCTATTGTGCGTAATACTATTAGATTGTTTTATTTGGTGCTATATCCAGATGTCTATGCCACTGGTAAA  
GAAATGAGAATCATTGACTTCTCTGGACACTAACCAATCATTTAAGTATCTGGTTTGCAACCTGCCTCAGCATTTACTA  
TTTCTTCAAGATAGGTAATTTCTTTACCCACTTTTCTCTGGATGAAGTGGAGAATTGACAGGGTGATTTCCTGGATTCT  
TACTGGGGTGCCTGTTCTCTCTGTGTTTATTAGCCTTCCAGCCACTGAGAATTTGAACGCTGATTTTCAGGTTTTGTGTG  
AAGGCAAGAGGAAACAACTTAACCTGGAGTGCAGAGTAAATAAACTCAACATGCTCTACCAAGTTATTTCTCAA  
CCTGGCAACGCTGCTCCCTTTTGTGTGCCTAATGTCCTTTTCTCTTGATCCTCTCCCTGCGGAGACATATCAGGC  
GAATGCAGCTCAGTGCCACAGGGTGCAGAGACCCAGCACAGAAGCCATGTGAGAGCCCTGAAAGCTGTCATTTCTTTC  
CTTCTCTCTTTATTGCCTACTATTTGTCCTTTCTCATTGCCACCTCCAGCTACTTTATGCCAGAGACGGAATTAGCTGT  
GATTTTTGGTGAGTCCATAGCTCTAATCTACCCCTCAAGTCATTCATTTATCCTAATACTGGGGAACAATAAATTAAGAC  
ATGCATCTCTAAAGGTGATTTGGAAAGTAATGTCTATTCTAAAGGAAGAAATTCACAACATAAACAAATCTGA

>Hosa-T2R8

ATGTTTCAGTCCTGCAGATAACATCTTTATAATCCTAATAACTGGAGAATTCATACTAGGAATATTGGGGAATGGATACAT  
TGCACTAGTCAACTGGATTGACTGGATTAAGAAGAAAAAGATTTCCACAGTTGACTACATCCTTACCAATTTAGTTATCG  
CCAGAATTTGTTTGTATCAGTGAATGGTTGTAATGGCATTGTAATAGTACTGAACCCAGATGTTTATACAAAAATAAA  
CAACAGATAGTCATTTTTACCTTCTGGACATTTGCCAACTACTTAAATATGTGGATTACCACCTGCCTTAATGCTTCTA  
TTTTCTGAAGATAGCCAGTTCCTCTCATCCACTTTTTCTCTGGCTGAAGTGGAAAATTGATATGGTGGTGCATGGATCC  
TGCTGGGATGCTTTGCCATTTCTTGTGTGTCAGCCTATAGCAGCAATAGTACTGAGTTGTGATTATAGGTTTCATGCA  
ATTGCCAAACATAAAAGAAACATTACTGAAATGTTCCATGTGAGTAAAAATACCATACTTTGAACCTTGACTCTCTTAA  
CCTGTTTGAATTTGCCATTTATTGTGTCCTGATATCATTTTTCTTTTGAAGATCTTTATGGAGACATACCAAGC  
AAATAAACTCTATGCTACCGGCAGTAGAGACCCAGCACAGAAGTTTATGTGAGAGCCATTAACCTATGACTTCATTT  
ATCTTCTTTTTTTTTCTTACTATATTTCTTATTTTGTATGACCTTTAGCTATCTTATGACAAAATACAAGTTAGCTGT  
GGAGTTTGGAGAGATTGCAGCAATCTCTACCCCTTGGTCACTCACTTATTTTAATTGTTTTAAATAATAAACTGAGGC  
AGACATTTGTCAGAAATGCTGACATGTAGAAAAATGCCTGCATGATATGA

>Hosa-T2R9

ATGCCAAGTGCAATAGAGGCAATATATATTATTTAATTGCTGGTGAATTGACCATAGGGATTTGGGGAATGGATTCAT  
TGCTACTAGTTAACTGCATTGACTGGCTCAAAAGAAGAGATATTTCTTGATTGACATCATCCTGATCAGCTTGGCCATCT  
CCAGAATCTGTCTGTGTGTGAATATCATTAGATGGCTTCTTTATGCTGCTCTTTCCAGGTACATATGGCAATAGCGTG  
CTAGTAAGCATTGTGAATGTTGTCTGGACATTTGCCAATAATTCAAGTCTCTGGTTTACTTCTTGCTCAGTATCTTCTA  
TTTACTCAAGATAGCCAAATATATCGCACCCATTTTTCTTCTGGCTGAAGTCAAGATCAACAAAGTTCATGCTTGGCATT  
TTCTGGGGTCTTTCTTATCTCTTTAATTATTAGTGTCCAAAGAATGATGATATGTGGTATCACCTTTTCAAAGTCAGT  
CATGAAGAAAACATTACTTGGAAATCAAAGTGAGTAAATTCAGGTACTTTCAAACAGTTAACCCTGAACCTGGGGGT  
GATGGTTCCCTTTATCCTTTGCCTGATCTCATTTTTCTTGTTACTTTTCTCCCTAGTTAGACACACCAAGCAGATTCGAC  
TGCATGCTACAGGGTTCAGAGACCCAGTACAGAGGCCACATGAGGGCCATAAAGGCAGTGATCATCTTTCTGCTCCTC  
CTCATCGTGTACTACCCAGTCTTTCTTGTTATGACCTCTAGCGCTCTGATTCTCAGGGAAAATTAGTGTGATGATTGG  
TGACATAGTAACTGTCATTTCCCATCAAGCCATTCATTCTAATTATGGGAAATAGCAAGTTGAGGGAAGCTTTTC  
TGAAGATGTTAAGATTTGTGAAGTGTTCCTTAGAAGAAGAAAGCCTTTTGTTCATAG

>Hosa-T2R10

ATGCTACGTGATAGTGAAGGCATCTTCATTTTTGTTGTAGTTAGTGAGTCAGTGTTTGGGGTTTTGGGGAATGGATTTAT  
TGGACTTGTAACCTGCATTGACTGTGCCAAGAATAAGTTATCTACGATTGGCTTTATTCTCACCGGCTTAGCTATTTCAA  
GAATTTTTCTGATATGGATAATAATTACAGATGGATTTATACAGATATTCTCTCAAATATATATGCCTCCGGTAACCTA  
ATTGAATATATTAGTTACTTTTGGGTAATTGGTAATCAATCAAGTATGTGGTTTGCACCAGCCTCAGCATCTTCTATTT  
CCTGAAGATAGCAAAATTTTCCAACATACATTTTCTCTGGTTGAAGAGCAGAACAAATATGGTTCTTCCCTTCATGATAG  
TATTCTTACTTATTTTCATCGTTACTTAAATTTGCATACATTGCGAAGATTCTTAATGATTATAAAACGAAGATGACACA  
GTCTGGGATCTCAACATGTATAAAAGTGAATACTTTATTAACAGATTTTGCTAAATCTGGGAGTCATTTTCTTCTTTAC  
ACTATCCCTAATTACATGATTTTTTTAATCATTTCCCTTTGGAGACACAACAGGCAGATGCAATCGAATGTGACAGGAT  
TGAGAGACTCCAACACAGAAGCTCATGTGAAGGCAATGAAAGTTTTGATATCTTTCATCATCCTTTTATCTTGTATTTT  
ATAGGCTAGGCCATAGAAATATCATGTTTTACTGTGCGAGAAAACAACTGCTGCTTATGTTTGAATGACAACCACAGC  
CATCTATCCCTGGGGTCACTCATTTATCTTAATTCTAGGAAACAGCAAGCTAAAGCAAGCCTCTTTGAGGGTACTGCAGC  
AATTGAAGTGCTGTGAGAAAAGGAAAAATCTCAGAGTCACATAG

>Hosa-T2R11p

ATGTTGAATATATTGGAGGTTTTTCATGACTGTAATAGGTAGGGGATTTATAAAAGGAATGTAGGAAATTAATTCATTGGA  
CTCACAGATTGCATTGCCTGGATGAGAAATCAGAAGTTATGCATGGTTGGCTTCATTCTTACTAGTTTGGCCTTAGCCAG  
AATCAATATCTTCTATTAGAAAATCCCTGATGCTAGGGAAAGAAACCATATCCTTACCATTGTCCGGAGACTGGCCAAC  
CACTTGTGCATTTGATTGTCTACTTGTCTTGTCTTTTATTTTCTTAAAGATCGTCAATTTCTCCTATCTCTTTTACTT  
TTGGCTAAAATGGGAATTAACAAGGTAGCTTTCATACCTCCACTGGTATCGCCTTTTCTGTTTACCAACTTTCCTTTG  
ACGTACACTTTTGTGCTTCTGGTATCGTGTCCAAAAAATATGAAAGACATATGACTGGATTACTCAATGTAAGTAAT  
AATAAAAATGTTAATAATAATAATCTTCTTTATTGGATCTCTCTCTTCTTCTATTTCTTCGATTTTCTTTTGT  
GTTACTCTTTCTTCTGTAAGACACATGAAACACATTAGGTTCAATTTCAAGGATTGCAGAACCCAGTATACGGGCCCA  
TTTCAGAGCCAAGAAAACGGTTTTCTTTTTTGTCTTGTGCTATATAAAATTTGCCCTTTTCTTGACATTTACAGGGG  
TATTTTTTGTACAGAACAACTGGTTGTGATATCTGGTTTATGATATGAAGTCAGTATTCTTTGGGTCACTCATATGTT  
GTGATTTTTGGATACGGCCAAATGAAGAAAATTTCTTGGGGATTCTCTGGCACCTGAAATGTGGCCTGAAAGGACGGGC  
ACTCTTAGCTACACAGGTAG

>Hosa-T2R12p

ATGTCAAGCATTTGGGAGACACTGTTTATAAGAATTCTTGTAGTGTAATTCATAATGGGGACTGTGGGAAATTGATTCAT  
TGTATTGGTTAATATCATTGACTGAATCAGGAACGTAAAGGCTCCCTGATTGATTTTATTCTCAACTGCTTGGCCATCT  
CCAGGATATGTTTCTGTAGATAACAATTTTAGCTACCTCTTCAATATAGGCTATGAGAAAAAGCTGATTCTAAGAAT  
CTTGACAGTAAGTTTTGACATTCTCTGGACAGGATCCAGCTATTTCTGCCTGTCTGTACCACTTGCCTCAGTGTCTCTA  
TTTCTCAAGGTAGCCAACTTCTCCAATCCCATTTCCTCTGGATGAAATGGAAAAATTCACAAGGTGCTTCTCTTTATTG  
TACTAGAGGCAACGATCTCTTTCTGCACAACCTTCCATTCTGAAGGAAATAATAATTAATAGTTTAAATCTAAGAACGGGT  
ACAATAAAAGGCAACTTGACATTTAATTATATGGATACCATGCATGATTTCACTTCTCTGTTTCTCCTTCAGATGATGTT  
CATCCTTCTCTTTGTGGAAACACTGGCTTCCATTCTTCTTAATCCTCTCCTTATGGAGCCACACCAGGCAGATGAAGC  
TACATGGTATTTATCCAGGGATCCCAGCACAGAAGCCCATGTAACCTATAAAAGCTATAATTTCACTTCTACTCCTC  
TTTATTGTGCATTATTTATCAGTATCATACTAACATTGGCCTGTCTCTTAGACTTCGTTGCGGCAAGGACTTTTAG  
TAGTGTGCTGGTATTTTCCATCCATCTGGCCATTCACTTCTTAATTTTACGGGACAGCAAATGAAGCAAGCTTCTC  
TCTGTGCTCTGAAGAAGATGAAGTATGCCAAAAAGGACATAATCTCTCATTTTTATAACATGCCTGA

>Hosa-T2R13

ATGGAAGTGCCCTGCCAGTATCTTCACTCTTGAATAATTGCAGAATTCATAATTGGGAATTTGAGCAATGGATTAT  
AGTACTGATCAACTGCATTGACTGGGTCAAGGAGAGCTGTCTCAGTCGATAAACTCCTCATTATCTTGGCAATCT  
CCAGAATTGGGCTGATCTGGGAAATATTAGTAAGTTGGTTTTAGTCTGCATTATCTAGCCATATTTGTGTCTGGAACA  
GGATTAAGAATTATGATTTTTAGCTGGATAGTTTCTAATCACTTCAATCTCTGGCTTGTACAATCTTCAGCATCTTTTA  
TTTGCTCAAAATAGCGAGTTTCTAGCCCTGCTTTTCTCTATTGAAGTGGAGAGTAACAAAGTGATTCTGATGATAC  
TGCTAGGAACCTTGGTCTTCTTATTTTTAAATCTGATACAAATAAACATGCATATAAAAGACTGGCTGGACCGATATGAA  
AGAAACACAACCTTGAATTTCAAGTATGAGTGACTTTGAAACATTTTCAAGTGTGCGTCAAATTCATATGACTATGTT  
TCTAACACCATTTACTGTGGCCTTCACTCTTTTCTCCTGTTAATTTTCTCCTGCAGAAACATCTCCAGAAAATGCAAC  
TCAATTACAAAGGACACAGAGACCCAGGACCAAGGTCCATACAAATGCCTTGAAAATTGTGATCTCATTCTTTTATTC  
TATGCTAGTTTCTTTCTATGTGTTCTCATATCATGGATTTCTGAGCTGTATCAGAACACAGTGATCTACATGCTTTGTGA  
GACGATTGGAGTCTTCTCTCTTCAAGCCACTCCTTTCTCTGATTCTAGGAAACGCTAAGTTAAGACAGGCCTTTCTTT  
TGGTGGCAGCTAAGGTATGGGCTAAACGATGA

>Hosa-T2R14

ATGGGTGGTGTCAATAAGAGCATATTTACATTCGTTTTAATTGTGGAATTTATAATTGGAAATTTAGGAAATAGTTTCAT  
AGCACTGGTGAACGTATTGACTGGGTCAAGGGAAGAAAGATCTCTCGGTTGATCGGATCCTCACTGCTTTGGCAATCT  
CTCGAATTAGCCTGGTTTGGTTAATATTGGAAGCTGGTGTGTGTCTGTGTTTTCCAGCTTTATTTGCCACTGAAAA  
ATGTTTCAAGATGCTTACTAATATCTGGACAGTGATCAATCATTTTAGTGTCTGGTTAGCTACAGGCCTCGTACTTTTTA  
TTTTCTCAAGATAGCCAAATTTTTCTAACTCTAATTTTTCTCTACCTAAAGTGGAGGGTTAAAAAGGTGGTTTTGGTGGTGC  
TTCTTGTGACTTCGGTCTTCTTGTTTTTAAATATTGCACTGATAAACATCCATATAAATGCCAGTATCAATGGATACAGA  
AGAAACAAGACTTGCAAGTCTGATTCAAGTAACCTTACACGATTTTCCAGTCTTATTGTATTAACCAGCACTGTGTTCA  
TTTCATACCTTTTACTTTGTCCCTGGCAATGTTTCTTCTCCTCATCTTCCATGTGGAACATCGAAGAAGATGCAGC  
ACACTGTCAAAATATCCGAGACGCCAGCACCAAGCCACAGAGGAGTTAAAAGTGTGATCACTTTCTTCTACTCTAT  
GCCATTTTCTCTGTCTTTTTTTCATATCAGTTTGGACCTCTGAAAAGTTGGAGGAAAACTAATTATTCTTTCCAGGT  
GATGGGAATGGCTTATCCTTCATGTCACTCATGTGTTCTGATTCTTGAAACAAGAAGCTGAGACAGGCCTCTCTGTGAG  
TGCTACTGTGGCTGAGGTACATGTTCAAAGATGGGGAGCCCTCAGGTCACAAAGAATTTAGAGAATCATCTTGA

>Hosa-T2R15p

ATGATAACTTTTTCTACCCATCATTTTTTCCATTCTAGTAGTGGTTACATTTGTTCTTGGGAATTTTGCTAATGGCTTCAT  
AGTGTGGTAAATTCATTGAGTGGGTCAAGAGACAAAAGATCTCCTTTGCTGACCAAAATTCCTACTGCTCTGGCAGTCT  
CCAGAGTTGGTTTGTCTGGGTAATATTATACATTGGTATGCAACTGTTTTGAATCCAGGTTTATAGTTAGGAGTA  
AGAATTACTACTATTAATGCCTGGGCTGTAACCAACCATTTAGCATCTGGGTTGCTACTAGCCTCAGCATATTTTATTT  
CCTCAAGATTGCCAATTTCTCCAACCTTATTTTTCTTCACTTAAAAAGGAGAATTAAAGAGTGTCATTCCAGTGATACTAT  
TGGGGTCTTTGTTATTTTTGTTTGTGATCTTGTGTGGTAAACATGGATGAGAGTATGTGGACAAAAGAATATGAAGGA  
AACGTGAGTTGGGAGATCAAAATGAGTGATCCGACGCACCTTTCAGATATGACTGTAAACCAGCTTGCAAACTTAATACC  
CTTTACTCTGCTGTTATCTTTTCTGCTCTTAATCTGTTCTTTGTGTAACATCTCAAGAAGATGCAGTCCATGGCA  
AAGGATCTCCAGATTCCAACACCAAGTCCACATAAAAGCTTTGCAACGGTGAGCTTCTTCTTCTTGTATTGTTGCTGT  
TACTTTCTGTCCCTAATCACATCGATTTGGAATTTTAGGAGGAGGCTGTAGAACGAACCTGTCTCATGCTCAGCCAAAC  
TACTGCAATTATATACCTTCATTTCACTTATTCATCTTAATTTGGGGAAGCAAGAAGCTGAAACAGACCTTTCTTTTGA  
TTTTGTGTCAGATTAAGTGCTGA

>Hosa-T2R16

ATGATACCCATCCAACCTCACTGTCTTCTTATGATCATCTATGTGCTTGAGTCTTGACAATTATTGTGCAGAGCAGCCT  
AATTGTTGCAAGTGTGGGAGAGAAATGGCTGCAAGTCAGAAGGCTGATGCCTGTGGACATGATTCTCATCAGCCTGGGCA  
TCTCTCGTTCTGTCTACAGTGGGATCAATGCTGAACAATTTTGTCTCTATTTAATTTGAATTATGTACTTTGCAAC  
TTAAACAATCACTGGGAATTTTTTAATATCCTTACATTCTGGTTAAACAGCTTGCTTACCGTGTCTACTGCATCAAGGT  
CTCTTCTTCCACCATCACATCTTTCTGCTGAGGTGGAGAAATTTGAGGTTGTTTCCCTGGATTAATCTGGGTTCTC  
TGATGATTACTTGTGTAACAATCATCCCTTCACTATTGGGAATTACATTCAAATTCAGTTACTCACCATGGAGCATCTA  
CCAAGAAACAGCACTGTAAGTGAACAACCTGAAAATTTTATCAGTATCAGTTCCAGGCTCATACAGTTGCATTGGTTAT  
TCCTTTTATCTCTGTTCTGGCCTCCACCATCTTCTCATGGCATCACTGACCAAGCAGATACAACATCATAGCACTGGTC  
ACTGCAATCCAAGCATGAAAGCGCGCTTCACTGCCCTGAGGTCCCTTGCCGTCTATTTATTGTGTTTACCTCTTACTTT  
CTAACCATACTCATCACCATTATAGTACTCTATTTGATAAGAGATGTTGGTTATGGGTCTGGGAAGCTTTTGTCTATGC  
TTTCATCTTAATGCATCCACTTCACTGATGCTGAGCAGCCCTACGTTGAAAAGGATTCTAAAGGGAAGTGCTAG

>Hosa-T2R38

ATGTTGACTCTAACTCGCATCCGCACTGTGTCTATGAAGTCAGGAGTACATTTCTGTTCACTTCAGTCTGGAGTTGC

AGTGGGGTTTCTGACCAATGCCTTCGTTTTCTTGGTGAATTTTTGGGATGTAGTGAAGAGGCAGGCACTGAGCAACAGTG  
ATTGTGTGCTGCTGTGTCTCAGCATCAGCCGGCTTTTCCCTGCATGGACTGCTGTTCTGAGTGCTATCCAGCTTACCCAC  
TTCCAGAAGTTGAGTGAACCACTGAACCACAGCTACCAAGCCATCATCATGTATGGATGATTGCAAACCAAGCCAACCT  
CTGGCTTGTGCCTGCCTCAGCCTGCTTTACTGTCCAAGCTCATCCGTTTCTCTCACACCTTCTGATCTGCTTGGCAA  
GCTGGGTCTCCAGGAAGATCTCCAGATGCTCCTGGGTATTATCTTTGCTCCTGCATCTGCACTGTCTCTGTGTTTGG  
TGCTTTTTTAGCAGACCTCACTTCAAGTCACAACCTGTGCTATTTCATGAATAACAATACAAGGCTCAACTGGCAGAATAA  
AGATCTCAATTTATTTTATCTTTCTCTTCTGTATCTGTGGTCTGTGCCTCCTTCTATTGTTTCTGTTTCTTCTG  
GGATGCTGACTGTCTCCTGGGAAGGCACATGAGGACAATGAAGGTCTATACCAGAACTCTCGTGACCCAGCCTGGAG  
GCCCCATTAAAGCCCTCAAGTCTCTTGTCTCCTTTTTCTGCTTCTTTGTGATATCATCCTGTGTGCCTTCATCTCTGT  
GCCCCTACTGATTCTGTGGCGGACAAAATAGGGGTGATGGTTTGTGTTGGGATAATGGCAGCTTGTCCCTCTGGGCATG  
CAGCCATCCTGATCTCAGGCAATGCCAAGTTGAGGAGAGCTGTGATGACCATTCTGCTCTGGGCTCAGAGCAGCCTGAAG  
GTAAGAGCCGACCACAAGGCAGATTCCTGGACACTGTGCTGA

>Hosa-T2R39

ATGACTAAACTCTCGCATCTGCAGAAAGTGAATTGTGCCATTTCTCATCACCTTAATTTTAGCAGTTTTACTTGCTGA  
ATACCTCATTGGTATCATTGCAATGGTTTCATCATGGCTATACATGCAGCTGAATGGGTTCAAATAAGGCAGTTTCCA  
CAAGTGGCAGGATCTGGTTTTCTGAGTGTATCCAGAATAGCTCTCAAAGCCTCATGATGTTAGAAATTACCATCAGC  
TCAACCTCCCTAAGTTTTTATTCTGAAGACGCTGTATATTATGCATTCAAATAAGTTTTATATTCTTAAATTTTTGTAG  
CCTGTGGTTTGTGCTGCTGGCTCAGTTTCTTCTACTTTGTGAAGATTGCCAATTTCTCTACCCCTTTTTCTCAAAGTGA  
GGTGGAGAATTACTGGATTGATACCCTGGCTTCTGTGGCTGTCCGTGTTATTTCTTCAGTCACAGCATGTTCTGCATC  
AACATCTGCACTGTGATTGTAACAATCTTTCCCTATCCACTCCTCCAAGTCCACTAAGAAAACATACTTGTCTGAGAT  
CAATGTGGTGGTCTGGCTTTTTCTTTAACCTGGGATTGTGACTCCTCTGATCATGTTTCATCCTGACAGCCACCCTGC  
TGATCCTCTCTCAAGAGACACACCTACACATGGGAAGCAATGCCACAGGGTCCAACGACCCAGCATGGAGGCTCAC  
ATGGGGGCCATCAAAGCTATCAGCTACTTTCTATTCTCTACATTTTCAATGCAGTTGCTCTGTTTATCTACCTGTCCAA  
CATGTTTGACATCAACAGTCTGTGGAATAATTTGTGCCAGATCATCATGGCTGCCTACCCTGCCAGCCACTCAATTCTAC  
TGATTCAAGATAACCCTGGGCTGAGAAGAGCCTGGAAGCGGCTTCAGCTTCGACTTCATCTTTACCCAAAAGAGTGGACT  
CTGTGA

>Hosa-T2R40

ATGGCAACGGTGAACACAGATGCCACAGATAAAGACATATCCAAGTTCAAGGTCACCTTCACTTTGGTGGTCTCCGGAAT  
AGAGTGCATCACTGGCATCCTTGGGAGTGGCTTCATCACGGCCATCTATGGGGCTGAGTGGGCCAGGGGCAAAACACTCC  
CACTGGTGACCCGATTATGTTGATGCTGAGCTTTTCCAGGCTCTTGCTACAGATTGGATGATGCTGGAGAACATTTTC  
AGTCTGCTATTCCGAATTTTATAACCAAAACTCAGTGATATCTCTTCAAAGTCATCACTGTCTTTCTGAACCATTC  
CAATCTCTGGTTTGTGCTGGCTGCTCAAAGTCTTCTATTGTCTTAGAATTGCAAACCTCAATCATCCTTTGTTCTTCTGA  
TGAAGAGGAAAATCATAGTGTGATGCTGCTGGCTTCTCAGGCTGTGAGTGTGGTTTCTTAAGCTTCAGCTTTCCTCTC  
TCGAGAGATGCTTCAATGTGTATGTGAATAGTCCATTCCTATCCCTCCTCCAAGTCCACGGAGAAGAAGTACTTCTC  
TGAGACCAATATGGTCAACCTGGTATTTTTCTATAACATGGGGATCTTCTGTTCTCTGATCATGTTTCATCCTGGCAGCCA  
CCCTGCTGATCCTCTCTCAAGAGACACACCTACACATGGGAAGCAATGCCACAGGGTCCAGGGACCCAGCATGAAG  
GCTCAGATAGGGGCCATCAAAGCCACAGCTACTTTCTCATCCTCTACATTTTCAATGCAATTGCTCTATTTCTTCCAC  
GTCCAACATCTTTGACACTTACAGTTCTGGAATATTTGTGCAAGATCATCATGGCTGCCTACCCTGCCGGCCACTCAG  
TACAACTGATCTTGGGCAACCTGGGCTGAGAAGAGCCTGGAAGCGGTTTCAGCACCAAGTTCCTCTTTACCTAAAAGGG  
CAGACTCTGTGA

>Hosa-T2R41

ATGCAAGCAGCACTGACGGCCTTCTCGTGTGCTCTTTAGCCTGCTGAGTCTTCTGGGGATTGCAGCGAATGGCTTCAT  
TGTGCTGGTGTGGGCAGGGAGTGGCTGCGATATGGCAGGTTGCTGCCCTTGATATGATCCTCATTAGCTTGGTGCCT  
CCCGCTTCTGCCTGCAGTTGGTTGGGACAGTGACAACCTTCTACTACTCTGCCCAGAAAGGTCGAGTACTCTGGGGGTCTC  
GGCCGACAGTTCTTCATCTACACTGGCACTTCTGAACTCAGCCACCTTCTGGTTTTGCAGCTGGCTCAGTGTCTGTT  
CTGTGTGAAGATTGCTAACATCACACTCCACCTTCTGTGGCTGAAGTGGAGGTTCTAGGGTGGGTGCCCTGGCTCC  
TGTTGGGCTGCTGCTGATCTCCTTCATATAACCTGCTGTTTTTTGGGTGAAGTACCCTGTATATCAAGAATTTTTTA  
ATTAGAAAATTTTTCTGGGAACATGACCTACAAGTGAATACAAGGATAGAAAACATACTATTTCCCATCCCTGAAACTGGT  
CATCTGGTCAATTCCTTTTCTGTTTTCTGGTCTCAATTATGCTGTTAATTAATTCTCTGAGGAGGCATACTCAGAGAA  
TGCAGCACACGGGCACAGCTGACAGACCCAGCAGCCAGGCTCACACCAGAGCTCTGAAGTCCCTCATCTCCTTCTC  
ATTCTTTATGCTCTGTCTTTCTGTCCCTGATCATTGATGCCGAAAATTTATCTCCATGCAGAACGACTTTTACTGGCC  
ATGGCAAATTCAGTCTACCTGTGCATATCTGTCCATCCCTTCATCCTCATCTTCAGCAACCTCAAGCTTCGAAGCGTGT  
TCTCAGAGCTCCTGTTGTTGGCAAGGGGCTTCTGGGTGGCTGA

>Hosa-T2R43

ATGATAACTTTTCTACCCATCATTTTTTCCAGTCTGGTAGTGGTTACATTTGTTATTGGAAATTTTGCTAATGGCTTCAT  
AGCACTGGTAAATTCATTGAGTCGTTCAAGAGACAAAAGATCTCCTTGTGACCAAATTCCTACTGCTCTGGCGGTCT  
CCAGAGTTGGTTTGTCTGGGTATTATTAATACTGGTATTCAACTGTGTTGAATCCAGCTTTTAATAGTGTAAGAGTA  
AGAATACTGCTTATAATATCTGGGCAGTGATCAACCATTTAGCAACTGGCTTGCTACTACCCTCAGCATATTTTATTT  
GCTCAAGATTGCCAATTTCTCCAACTTATTTTTCTTCACTTAAAGAGGAGAGTTAAGAGTGTCAATTCTGGTGATGTTGT  
TGGGGCCTTTGCTATTTTTGGCTTGTATCTTTTTGTGATAAACATGAATGAGATTGTGCGGACAAAAGAATTTGAAGGA  
AACATGACTTGGGAAGATCAAATGAAGAGTGAATGTACTTTTTCAAATATGACTGTAAACCATGGTAGCAAACCTTAGTACC  
CTTCACTCTGACCTACTATCTTTATGCTGTTAATCTGTTCTTTGTGTAACATCTCAAGAAGATGCAGCTCCGTGGTA  
AAGGATCTCAAGATCCCAGCAGGAAGTCCACATAAAAGCTTTGCAAACGTGATCTCCTTCTTCTGTTATGTGCCATT  
TACTTTCTGTCCATAATGATATCAGTTTGGAGTTTTGGAAGTCTGGAAAACAAACCTGTCTTCATGTTCTGCAAAGCTAT  
TAGATTCACTATCCTTCAATCCACCATTCATCCTGATTTGGGGAACAAGAAGCTAAAGCAGACTTTTCTTTCAGTTT

TTTGGCAAATGAGGTACTGGGTGAAAGGAGAGAAGACTTCATCTCCATGA

>Hosa-T2R44

ATGACAACTTTTATACCCATCATTTTTTCCAGTGTGGTAGTGGTTCTATTTGTTATTGGAAATTTTGCTAATGGCTTCAT  
AGCATTGGTAAATTCATTGAGCGGGTCAAGAGACAAAAGATCTCTTTGCTGACCAGATTCTCACTGCTCTGGCGGTCT  
CCAGAGTTGGTTTGTCTGGGTATTATTATTAATTTGGTATTCAACTGTGTTAATCCAGCTTTTTATAGTGTAGAAGTA  
AGAAGTACTGCTTATAATGTCTGGGCAGTAACCGGCCATTTTCAGCAACTGGCTTGCTACTAGCCTCAGCATATTTTATTT  
GCTCAAGATTGCCAATTTCTCCAACCTTATTTTTCTTCACTTAAAGAGGAGAGTTAAGAGTGTCAATTCTGGTGATGCTGT  
TGGGGCCTTTACTATTTTTGGCTTGTCAACTTTTTGTGATAAATCATGAAAGAGATTGTACGGACAAAAGAATATGAAGGA  
AACATGACTTGGAAGATCAAATTTGAGGAGTGCAGTGACCTTTTCAGATGCGACTGTAAACCACGCTAGGAACTTAGTGCC  
CTTCACTCTGACCCTGCTATGTTTTTGGCTGTTAATCTGTTCTCTGTGTAAACATCTCAAGAAGATGCAGCTCCATGGTA  
AAGGATCTCAAGATCCCAGCACCAAGGTCCACATAAAAGCTTTGCAAACCTGTGATCTTTTTCTCTTGTATGTGCCGTT  
TACTTTCTGTCCATAATGATATCAGTTTGGAGTTTTGGGAGTCTGGAACAAAACCTGTCTTCATGTTCTGCAAAGCTAT  
TAGATTCACTATCTTCAATCCACCATTATCTGATTGGGGAACAAGAAGCTAAAGCAGACTTTTCTTTCAGTTT  
TGGCGCAAGTGAGTACTGGGTGAAAGGAGAGAAGCCTTCATCTCCATGA

>Hosa-T2R45

ATGATAACTTTTCTGCCATCATATTTTCCATTCTAGTAGTGGTTACATTTGTTATTGGAAATTTTGCTAATGGCTTCAT  
AGCGTTGGTAAATTCACCGAGTGGGTGAAGAGACAAAAGATCTCTTTGCTGACCAAATTTGCTACTGCTCTGGCGGTCT  
CCAGAGTTGGTTTGTCTGGGTATTATTATTAATTTGGTATTCAACTGTGTTGAATCCAGCTTTTTGTAGTGTAGAATTA  
AGAAGTACTGCTTATAATATCTGGGCAGTAACCGGCCATTTTCAGCAACTGGCTTGCTACTAGCCTCAGCATATTTTATTT  
GCTCAAGATTGCCAATTTCTCCAACCTTATTTTTCTTCACTTAAAGAGGAGAGTTAAGAGTGTCAATTCTGGTGGTGTGT  
TGGGGCCTTTGCTATTTTTGGCTTGTCACTTTTTGTGGTAAACATGAATCAGATTGTATGGACAAAAGAATATGAAGGA  
AACATGACTTGGAAGATCAAATTTGAGGCGTCAATGTACCTTTTCAGATACGACTGTAAACCATGCTAGCAAACCTTAGTACC  
CTTTACTGTAAACCTGATATCTTTTTCTGCTGTTAGTCTGTTCTCTGTGTAAACATCTCAAGAAGATGCAGCTCCATGGCA  
AAGGATCTCAAGATCCCAGTACCAAGGTCCACATAAAAGTTTTGCAAACCTGTGATCTCTTCTTCTTGTACGTGCCATT  
TACTTTGTGTCTGTAATAATATCAGTTTGGAGTTTTAAGAATCTGGAACAAAACCTGTCTTCATGTTCTGCAAAGCTAT  
TGGATTCACTGTTCTTCAGCCACCCGTTATCTGATTGGGGAACAAGAAGCTAAAGCAGACTTATCTTTCAGTTT  
TGTGGCAAATGAGGTACTGA

>Hosa-T2R46

ATGATAACTTTTCTGCCATCATTTTTTCCATTCTAATAGTGGTTACATTTGTGATTGGAAATTTTGCTAATGGCTTCAT  
AGCATTGGTAAATTCATTGAGTGGTTAAGAGACAAAAGATCTCTTTGCTGACCAAATTTCTCACTGCTCTGGCAGTCT  
CCAGAGTTGGTTTACTCTGGGTATTAGTATTAAATTTGGTATGCAACTGAGTTGAATCCAGCTTTTTAAGCAGTATAGAAGTA  
AGAATTACTGCTTACAATGTCTGGGCAGTAATCAACCATTTTCAGCAACTGGCTTGCTACTAGCCTCAGCATATTTTATTT  
GCTCAAGATTGCCAATTTCTCCAACCTTATTTTTCTTCACTTAAAGAGGAGAGTTAAGAGTGTGTTCTGGTGATACTAT  
TGGGGCCTTTGCTATTTTTGGTTTGTCACTTTTTGTGATAAATCATGAATCAGATTATATGGACAAAAGAATATGAAGGA  
AACATGACTTGGAAGATCAAATTTGAGGAGTCAATGTACCTTTCAAATACAACGGTAACCATCCTAGCAAACCTTAGTCC  
CTTCACTCTGACCCTGATATCTTTTCTGCTGTTAATCTGTTCTCTGTGTAAACATCTCAAAAAGATGCAGCTCCATGGCA  
AAGGATCTCAAGATCCCAGCATGAAGGTCCACATAAAAGCTTTGCAAACCTGTGACCTCCTTCTTCTTGTATGTGCCATT  
TACTTTCTGTCCATAATCATGTCACTTTGGAGTTTTGAGAGTCTGGAACAAAACCTGTCTTCATGTTCTGCGAAGCTAT  
TGCATTCACTATCTTCAACCCACCCATTATCTGATTGGGGAACAAGAAGCTAAAGCAGACTTTTCTTTCAGTTT  
TGTGGCAAATGAGGTACTGA

>Hosa-T2R47

ATGATAACTTTTCTGCCATCATTTTTTCCATTCTAATAGTGGTTATATTTGTTATTGGAAATTTTGCTAATGGCTTCAT  
AGCATTGGTAAATTCATTGAGTGGGTCAAGAGACAAAAGATCTCTTTGTTGACCAAATTTCTCACTGCTCTGGCGGTCT  
CCAGAGTTGGTTTGTCTGGGTGTTATTACTACATTGGTATGCAACTCAGTTGAATCCAGCTTTTTATAGTGTAGAAGTA  
AGAATTACTGCTTATAATGTCTGGGCAGTAACCAACCATTTTCAGCAGCTGGCTTGCTACTAGCCTCAGCATGTTTTATTT  
GCTCAGGATTGCCAATTTCTCCAACCTTATTTTTCTTGCATAAAGAGGAGAGTTAAGAGTGTGTTCTGGTGATACTGT  
TGGGGCCTTTGCTATTTTTGGTTTGTCACTTTTTGTGATAAATCATGGATGAGACTGTATGGACAAAAGAATATGAAGGA  
AACGTGACTTGGAAGATCAAATTTGAGGAGTCAATGTACCTTCAAATATGACTCTAACCATGCTAGCAAACCTTAGTACC  
CCTCACTCTGACCCTGATATCTTTTCTGCTGTTAATCTGTTCTCTGTGTAAACATCTCAAGAAGATGCAGCTCCATGGCA  
AAGGATCTCAAGATCCCAGCACCAAGGTCCACATAAAAGCTTTGCAAACCTGTGACCTCCTTCTTCTGTTATGTGCCATT  
TACTTTCTGTCCATGATCATATCAGTTTGAATTTTGGGAGGCTGGAACAAACCTGTCTTCATGTTCTGCAAAGCTAT  
TATATTCAGCTATCTTCAACCCACCCATTATCTGATTGGGGAACAAGAAGCTAAAGCAGATTTTCTTTCAGTTT  
TGGCGCATGTGAGGTACTGGGTGAAAGACAGAAGCCTTCGTCTCCATAGATTCACAGAGCAGCATTGTGTAAGGGC

>Hosa-T2R48

ATGATGTGTTTTCTGCTCATTTTCATCAATCTGGTAGTGTGTCATTTGTTCTTGGAAATGTTGCCAATGGCTTCAT  
AGCCCTAGTAAATGTCTTACTGGGTAAACACAGAAAGATCTCCTCAGCTGAGCAAATTTCTCACTGCTCTGGTGGTCT  
CCGAATTTGGTTTACTCTGGGTGATGTTATTCTTTGGTATGCAACTGTGTTAATTTCTGCTTTATATGTTTGAAGTA  
AGAATTGTTGCTTCAATGCCTGGGCTGTAAACGAACCATTTTCAGCATGTGGCTTGCTGCTAGCCTCAGCATATTTTGT  
GCTCAAGATTGCCAATTTCTCCAACCTTATTTCTTCCACCTAAAGAAGAGAATTAAGAGTGTGTTCTGGTGATACTGT  
TGGGGCCTTTGGTATTTTTGATTGTAACTTGTGTGATAACCATGGATGAGAGAGTGTGGACAAAAGAATATGAAGGA  
AATGTGACTTGGAAGATCAAATTTGAGGAATGCAATACACCTTTCAAGCTTGACTGTAACCTACTCTAGCAAACCTCATACC  
CTTTACTCTGAGCCTAATATGTTTTCTGCTGTTAATCTGTTCTTTGTAAACATCTCAAGAAGATGCGGCTCCATAGCA  
AAGGATCTCAAGATCCCAGCACCAAGGTCCATATAAAAGCTTTGCAAACCTGTGACCTCCTTCTTCTGTTATTTGCCATT  
TACTTTCTGTGTATAATCACATCAACTTGAATCTTAGGACACAGCAGAGCAAACCTGTACTCTGCTTTGCCAACTGT  
TGCAATCATGTATCTTCACTCATTCATCTGATTATGGGAAGTAGGAAGCTAAACAGACCTTTCTTTCAGTTT

TGTGGCAGATGACACGCTGA

>Hosa-T2R49

ATGATGAGTTTTCTACACATTGTTTTTCCATTCTAGTAGTGGTTGCATTTATTCTTGAAATTTTGCCAATGGCTTTAT  
AGCACTGATAAATTTTCATTGCTGGGTCAAGAGACAAAAGATCTCCTCAGCTGATCAAATTATTGCTGCTCTGGCAGTCT  
CCAAAGTTGGTTTTGCTCTGGGTAATATTATTACATTGGTATTCAACTGTGTTGAATCCAACCTTCATCTAATTTAAAGTA  
ATAATTTTTATTCTAATGCCTGGGCAGTAACCAATCATTTTCAGCATCTGGCTTGCTACTAGCCTCAGCATATTTTATTT  
GCTCAAGATCGTCAATTTCTCCAGACTATTTTTTCATCACTTAAAAAGGAAGGCTAAGAGTGTAGTTCTGGTGATAGTGT  
TGGGGTCTTTGTTCTTTTGGTTTGTACCTTGATGAAACACACGTATATAAATGTGTGGACAGAAGAATGTGAAGGA  
AACGTAACCTGGAAGATCAAACCTGAGGAATGCAATGCACCTTTCCAACCTGACTGTAGCCATGCTAGCAAACCTTGATACC  
ATTCACCTCTGACCTGATATCTTTCTGCTGTTAATCTACTCTCTGTGTAAACATCTGAAGAAGATGCAGCTCCATGGCA  
AAGGATCTCAAGATCCCAGCACCAAGATCCACATAAAAGCTCTGCAAACCTGTGACCTCCTTCCTCATATTACTTGCCATT  
TACTTTCTGTGTCTAATCATATCGTTTTGGAATTTAAGATGCGACCAAAAGAAATTGTCTTAATGCTTTGCCAAGCTTT  
TGGAAATCATATATCCATCATTCACCTCATTCTGATTGGGGGAACAAGACGCTAAAGCAGACCTTTCTTTCAGTTT  
TGTGGCAGGTGACTTGCTGGGCAAAAGGACAGAACCAGTCAACTCCATAG

>Hosa-T2R50

ATGATAACTTTTCTATACATTTTTTTTTCAATTCTAATAATGGTTTTATTTGTTCTCGGAACTTTGCCAATGGCTTCAT  
AGCACTGGTAAATTTTCATTGACTGGGTGAAGAGAAAAAAGATCTCCTCAGCTGACCAAATTCCTACTGCTCTGGCGGTCT  
CCAGAATTGGTTTCTCTGGGCATTATTATTAATTTGGTATTTAACTGTGTTGAATCCAGCTTTTATAGTGTAGAATTA  
AGAATTACTTCTTATAATGCCTGGGTGTAACCAACCATTTTCAGCATGTGGCTTGCTGCTAACCTCAGCATATTTTATTT  
GCTCAAGATTGCCAATTTCTCCAACCTTCTTTTTCTTCATTTAAAGAGGAGAGTTAGGAGTGTCACTTCTGGTGACTGT  
TGGGGACTTTGATATTTTTGGTTTGTACCTTCTTGCGCAACATGGATGAGAGTATGTGGGCAGAAGAATATGAAGGA  
AACATGACTGGGAAGATGAAATTTGAGGAATACAGTACATCTTTCATATTTGACTGTAACCTACCTATGGAGCTTCATACC  
CTTTACTCTGTCCCTGATATCTTTTCTGATGCTAATCTGTTCTCTGTATAAACATCTCAAGAAGATGCAGCTCCATGGAG  
AAGGATCGCAAGATCTCAGCACCAAGGTCCACATAAAAGCTTTGCAAACCTCTGATCTCCTTCCTTGTATGTGCCATT  
TTCTTTCTATTCTAATCGTTTCGGTTTGGAGTCTAGGAGGCTGCGGAATGACCCAGTTGTATGGTTAGCAAGGCTGT  
TGGAAACATATATCTTGCACTGACTCATTATCTAATTTGGAGAACCAAGAAGCTAAACACACCTTTCTTTTGATT  
TGTGTGAGATTAGGTGCTGA

>Hosa-T2R55

ATGGCCACCGAATTGGACAAAATCTTTCTGATTCTGGCAATAGCAGAATTCATCATCAGCATGCTGGGGAATGTGTTTCAT  
TGGACTGGTAAACTGCTCTGAAGGGATCAAGAACCAAAAGGTCTTCTCAGCTGACTTCATCCTCACCTGCTTGGCTATCT  
CCACAATTGGACAACCTGTTGGTGATACCTGTTTGATTCTTAGTGGGACTTGCTTCACATTTATATACCACATATAGA  
CTAGGAAAACTGTTATTATGCTTTGGCACATGACTAATCACTTGACAACCTGGCTTGCCACCTGCCTAAGCATTTTCTA  
TTTCTTTAAGATAGCCCACTTCCCCCACTCCCTTTTCTCTGGCTGAGGTGGAGGATGAACGGAATGATTGTTATGCTTC  
TTATATTGCTTTGTTCTTACTGATTTTTGACAGTTTAGTGCTAGAAATATTTATTGATATCTCACTCAATATAATAGAT  
AAAAGTAATCTGACTTTATATTTAGATGAAAGTAAACTCTCTATGATAAACTCTCTATTTTAAAACTCTTCTCAGCTT  
AACCAGTTTTATCCCTTTTCTCTGTTCTGACCTCCTTGCTTTTTTTATTTCTGCTTGGTGAGACATACTAGAAATT  
TGAAGCTCAGTTCCTTGGGCTCTAGAGACTCCAGCACAGAGGCCATAGGAGGGCCATGAAAATGGTGATGTCTTTCCTT  
TTCCTCTTCATAGTTCATTTTTTTCTTACAAGTGGCAATGGGATATTTTTATGTTGTGGAACAACAAGTACATAAA  
GTTTGTATGTTAGCCTTAAATGCCTTTCCTCTGTGCCACTCATTTATTCTCATTCTGGGAAACAGCAAGCTGCGACAGA  
CAGCTGTGAGGCTACTGTGGCATCTTAGGAACATATACAAAAACCAAAATGCTTTACCTTTGTAG

>Hosa-T2R56

ATGAATGGAGACCACATGGTTCTAGGATCTTCGGTGACTGACAAGAAGGCCATCATCTTGGTTACCATTTTACTCCTTTT  
ACGCCTGGTAGCAATAGCAGGCAATGGCTTCATCACTGCTGCTGGGCGTGAGTGGGTGCTACGGAGAATGTTGTTGC  
CTTGTGATAAGTTATTGGTTAGCCTAGGGGCTCTCGCTTCTGCTGAGTCAGTGGTAATGGGTAAAGACCATTATGTT  
TTCTTGATCCGATGGCCTTCCCATACAACCTGTACTGCAGTTTCTAGCTTCCAGTGGGACTTCTGAATGCTGCCAC  
CTTATGGTCTCTACCTGGCTCAGTGTCTTCTATTGTGTGAAAATTGCTACCTTCACCCACCTGTCTTCTTCTGGCTAA  
AGCACAAGTTGTCTGGGTGGCTACCATGGATGCTCTTCAGCTCTGTAGGGCTCTCCAGCTTCACCACCATTTCTATTTTC  
ATAGGCAACCAACAGAAATGTATCAGAATATTTAAGGAACATCTACAACCTTGGAAATGTCACTGGCGATAGCATGAG  
CTACTGTGAGAAATTTCTATCTTCCCTCTAAAAATGATTACTTGGACAATGCCCACTGCTGTCTTTTTCATTGATGA  
TTTTGCTCATCATCTCTGGGAAGACACAGGAAGAAGGCTCTCCTTACAACCTCAGGATTCGAGAGCCAGTGTGCAG  
GCACACATAAAGGCTCTGCTGGCTCTCCTCTTTTGGCATGCTCTTCATCTCATATTTCTGCTCACTGGTGTTCAGTGC  
TGCAGGTATTTTCCACCTCTGGACTTAAATTCTGGGTGTGGGAGTCAGTATTTATCTGTGTGCAGAGTTCACCCCA  
TCATTCTGCTCTTACGAACTGCAGGCTGAGAGCTGTGCTGAAGAGTCGTCGTTCTCAAGGTGTGGACACCTTGA

>Hosa-T2R62

ATGCCCTCCTTGCCACGTTGATCTTCATAGCCATCTTTTGCCTGGAGTCATTGGCTGCAATGCTGCAGAATGGATTCTT  
GGTCACAATGCTGGGCAGGGAGTGGTAAGGTGCCGGATGCTGCCACAAGTGACATGATTGTGGCTGTCTCGCTGCCT  
CCCGTTTCTGCCTGCATGGGTAGCCATGGTGAACAACCTCTGGCCTCCTTAGATTTTTCGCGTGCAAGTTCCCTATATG  
AACATCTTCTGGGACCTTTTCAATGCCCTCACTTTGTGGTTTACTGCCTTGCTTGCTGCTTTCTACTGTGTGAAGATCTC  
ATCTTTCTCCACCCACCTTCGCTGGCTGAAGTGGAGGAACCTCTCGTTAGTGCCCAAGCTGATCAAGGGCTCCCTGA  
TCATCTGTGGCCTGGAAGTCATCTCATCAGCCACTGGGAACATCCTGTTGGTCAGAGGAAGGTCTCCCTGAGTTCCTAC  
AGAAACGAAACTCTAGTTTATAGAGTGCAGGCTTCATTTTCAGCTCTACTTTTCTCTTATGAAGGGTTTGTGTGGTCGAT  
TCTGTTCTCTGTTCTAGTGTCCACTGTCTTGTCTCATAGTCTCACTGTGCTGGCAGTTGGGGCCCGGCCCTGTGATC  
CCAGCACCCAGGCTTACACTATGGCTTTAAAGTCACTCACCTTTTCCCTCATCTTCTGTACATTGTACTTCTGTCTTTG  
TTTGCTTCTGCTTTGAAAATCATAACTTTTCAAGTCACTGGCACTGGGCTGGTAAGTGCTAATCTATGCCAACATCTG  
TCTGCACTCTACCGTCTGGTGCTGAGGAGCCCCAACTGAAAAAGGCCCTGAAGACATGGCCTCAGTCCAGTGGCCAC

>Hosa-T2R63p

>Hosa-T2R64p

>Hosa-T2R65p

>Hosa-T2R66p

>Hosa-T2R67p

ATGCCACCTGGAATTGAAAAIACCTTTCTGATAGTAATGATGGGAGAATTCATAATCTGAATGTTAGGGAATGGGTTCCAT  
TGTACTAGTTAACTGCATTGACTGGTGAGGAGTCAAATGATCTTATTAGACAACGTCATCCTCACCAGCCTGGCTATCTC  
CACAATCAGTCAACTTTGGATAATACTACTTGATTTCATTGTAAACAGCATTATGGCCACATCTATATGCCTTCAATAAAC  
TAATAAAATTTATTCATATTTTGGGCATGACCAATGCTCTAGTTACCTGGCTTGCTGCCCTTAGTGTTTCTACTCTT  
TAAAAATACCTATTTTTCCCAACGTCTTCACTGGTGAGATGGAGAATTAGCAGACGCTACTTGAACCTCCCCTGG  
GGTCTTGCTCTTACTGTTTTTCAACCTTGCATTAAACAGTGGACTAGTACTTGTTGGATTAACTCTACACAATTAT  
GAAAGAACTCAACTGGTCTTTAGATGTAAGTAAAAATCTATATTGAGCCTCTGGATTCTTGTCAGTTTGATCTACTT  
AATTTCTTTCTTCTGTCCCTGATCTCACTGCTCCTTTAATTCTGTCCTTGATGAGACATATCAGGAATTTGCAGCTCA  
ACACCATGGGCCCGAGGGACCTCAGAATGAAGGCCCATGAAGGGCCATGAAAATGAAAATGAAAATGATGGTGTCTTTT  
CTCCTCTCTTTTGGTTTCACTTTTCTTCTCTACCAACAGGTTGGATTTTCTTATACAGCAGAAATAGCAGGCCAA  
TTTTTTGTCTTTGTTAAAGTCAATTATTTTTCTTCAAGCCACTGATGTCTCAATTTTGGAAAACGCAAGCTGAGAC  
AGACTGCTGTGGGACCATCTGGGCATCTTAAGTGCCACCTAAAAAGAGTGAACCTTTTAG

>Hosa-T2R68p

TCTGCTCATATTTTATCAATTCTGGTAGTGTTCATTGTCTTGAAATGTTGCCAATGGCTTCATAGCTCTAATTA  
ATGTCAATGACTGGGTAAAGACACAAAAGATCTCCTCACTGACCAAATGTCACTGCTCTGGCATTCTCCAGAAATGGT  
TTACTTTGATCATATTATTACATTGGTATGCAACTGTGTTAATTACAGCTTTATATAGTTTAGAAGTAAGAATTGTTCT  
TCTAATGTCTCGGCAATAATCAATCATTTGAGCATTGGCTTGCTACGAGCCTCAGCATATTTTATTTGTTCAAGATTGC  
CAATTTCTCCAATTTTATTTTCTCCACCTAAAGAAGAGAATTAAGAGTGTTCTTCTTGATACTGTTGGGGTCTTTGG  
TATTTTGTATTTGAATCTTGCTGTGGTAACCATGGATGACAGTGTGTGGACAAAAGAAATTTGAAGGAAATGTGACTTGG  
AAGATCGAATTGAGGAATGCAATACACCTTTCAAACATGACTATAACCAACCATGCTAGCAAACCTCACACTGTTCTTTC  
TGACTCTAATATCTTTCTGCTGTTAGTCTGTTCTCCGTGTAACATCTCAAGATGATGACGCTCCATGGCAAAGGATCT  
CAAGATCTCAGCACCAAGGTCCATATAAAACCTTTGCAAACCTGTTATCTCCTTCCGTATGTTATTTGCCATTTACTTTCT  
GTGTATAATCACATCAACTTGAATCTAGGACACAGCAGAGCAATCTTGATTCTGCTTTACCAAACCTCTTGCAATCA  
TGTATCCTTCATTCCACTCATTCATCTGATTATGAGAAGTAGGAAGCTAAACAGACCTCTCTTTCAGTTTTGTGTACG  
GT

>Mumu-T2R1

ATGACCTCCCTTTCCAGCTATTTATCACATGGTCATCATGACAGCAGAGTTTCTCATCGGGACTACAGTGAATGGATT  
CCTTATCATTGTGAAGTCTATGACTTGTTCAGAGCGGAACGTTCTGATCCTGCAGACCCTTGTATGTGCACAGGGC  
TGTCCAGACTCGGTCTGCAGATAATGCTCATGACCCAAAGCTTCTTCTGTGTTCTTTCCATACTCTTATGAGGAAAAT  
ATTTATAGTTCAGATATAATGTTCTGCTGGATGTTCTTCACTCGATTGGCCTCTGTTTGCACATGTCTCTGTCTT  
TTACTGCCTCAAGATTTCAAGGCTTCACTCCACCCTGGTTTCTTTGGCTGAAATTCAGAAATTCAAAGCTCATATTTTGGC  
TGCTTCTGGGCAGCTTGTGGCTCTCTGGGCACTGCAACTGTGTGCATCGAGGTAGGTTTCCCTTTAATTGAGGATGGC  
TATGCTCTGAGAAACGCAGGACTAAATGATAGTAATGCCAAGCTAGTGAGAAATAATGACTTGCTCTCATCAACCTGAT  
CCTCCTGCTTCCCTGTCTGTGTTTGTGATGTGCACCTCATGTTATTTGTTTCTTTACAAGCACATGCACTGGATGC  
AAAGCGAATCTCACAAGCTGTCAAGTGCCAGAACCAGCTCATATAAATGCATTAAAGACAGTGACAACATTTCTTTGT  
TTCTTTGTTTCTTACTTTGCTGCCTTCATGGCAAATATGACATTTAGAATCCATACAGAAGTCATCAGTTCTTCTGTTG  
GAAGGAAATCATGGCAGCATATCCCGCCGCCACTCTGTGATAATCGTCTTGAGTAACCTAAGTTCAAAGACTTATTCA  
GGAGAATGATCTGTCTACAGAAGGAAGAGTGA

>Mumu-T2R2

ATGGTGCCAAACGCAAGTCACCATCTTCTCCATCATCATGTATGTGCTTGAGTCCTTAGTAATAATTGTGCAAAGTTGCAC  
AACGGTTGCAGTGCTATTAGAGAGTGGATGCATTTCAAAGACTGTACCCTGGGAGACGATTCTCATCAGCCTGGGCA  
TCTCACATTTCTGTCTACAGTGGACATCAATGCTATACAACCTTTGGTACTTATTCTAGGCCTGTCCTTTATTTTGAAG  
GTATCAGTCGTCTGGGAGTTTCATGAACATTTTGACATTTCTGGTTAACCAGTTGGCTTGCTGTCCTCTACTGTGTCAAGGT  
CTCTTCTTCACTCACCCATCTTCTCTGGCTGAGGATGAAAATCTTGAACTGGTTCTCTGGTTGATACTGGGTGCTC  
TGATAGCTTCTTGTGTCATCATCCCTTCTGTTGTTAAATATCACATCCAGATGGAATTAGTCACCCCTAGATAATTTA  
CCCAAGAACAATTCTTTGATTCTAAGACTACAACAGTTTGAATGGTATTTTCTAATCCTTTAAAAATGATTGGCTTTGG  
TATTCCTTTCTTCTGTTCTTGGCTTCTATCATCTTACTCACAGTCTCATTGGTCCAACACTGGGTGCAGATGAAACACT  
ACAGCAGCAGCAACTCCAGCCTGAAAGCTCAGTTCACTGTTCTGAAAGTCTTGTGCTACCTTCTTCACTTCTTCAATCC  
TATTTTCTGACTATAGTCATCTCCTTATTGGCACTGTGTTTGATAAGAAATCTTGGTTCTGGGTCTGCGAAGCTGTCT  
CTATGGTTTAGTCTGATTCACTTCACTTCACTGATGATGAGCAACCTGCATTGAAAAAGGCACTGAAGCTGCAGTTCT  
GGAGCCAGAGCCTTCTGA

>Mumu-T2R3

ATGTTTGGATTTCATTGAAGGGGTGTTCTGGTTCTGACTATCACTGAGTTTATTCTTGAAATCTGGTGAATGGTTTCAT  
TGTGTCAATCAATAGCAGCTATTGGTTCAAGAGCAAGAAGATTTCTTGTCTAATTCATCATTACCAGCTTGGCCCTCT  
TCAGGATCTTCTGTTGTGGATTATCTTATTGATAGTCTTATAATAGTGTCTCTTACCAGACTCATGACTCAGGGATA  
ATGATGCAACTAATTGATGTTTTCTGGACATTTACAACCACTTCAGTATTTGGCTTATCTCCTGTCTCAGTGTTTTCTA  
CTGCCTGAAAATAGCCAGTTTCTCCACCCCTCATTCTCTGGCTCAAATGGAGAGCTTCTAGAGTGGTTGTTGGGATGC  
TGTGGGGCGCACTGCTCTTATCCTGTGTGCTAGTACCATGTCTCTGATGAATGAATTTAAGATCTATTCTGCCCTCACTAGA  
AGCAAAGACACACCAATATGACTGAATACATCAGACTGAAGCGACAGGAATATAATCTGATGCATGTTCTTGGGAATCT  
GTGGAAGATTCTTCTTAATTGTTTCCCTGGTTGCCCTACCTTCTGCTGCTCCTCTCTGGGGAAGCACACACAGCAGA  
TGCAGCAATACAGTATTGACTCCAGAGATCAGAGTGCTGAGGCCACAAAAGAGCCATGAGAATCATCTCTTCTTTCTC  
CTATTCTTCTTATTCTACTTTCTTCTTTATGATTTTGTCTCCAGTCGTTTCTTACCAGAAACCAGGATCGCCAGGAT  
AATTGGAGTAGTGATTTCAATGTCATACCTTGTGGTGATTCAATTTATTCTCATAGTATGTAACAACAAGCTGAAGCATA  
CATTTGTGGCCATGCTCCCATGTGAGTGTTGTCATCTGAAACCTGGATCTAAGGGACCCTCTGCTTCATAA

>Mumu-T2R4

ATGCTCTGGGAAGTGTATGATTTGTGTTTCTGCTCGGTTTTTTTAAATTTGTAGGAATCATTGCAAATCTATTTAT  
TATAGTGATAATTATTAAGACTTGGGTCAACAGTCGAGAAATGGCTCTCCGGATAGGATCCTGTTCACTTGGCCATCA  
CTAGATTCCTGACTTTGGGGTGTCTTACTGAACAGTGTCTACATTTGCTACAAATACTGGAAGTCACTACTTTTCC  
ACATTTTCTATTTGTGTTTGAAGTTCTGGATGCAACAGTCTCTGGTTAGTGACCATTCTGAACAGCTTGATTGTGT  
GAAGATTACTAATTTTCAACACCCAGTGTCTCTGTTGAAACGGACTATCTCTATGAAGACCACAGCCTGCTGTTGG  
CCTGTCTTCTGATTTAGCCCTCACCCTCTCTATATTATGCTCTCACAGATATCACGTTTCTGAACACATAATT  
GGGAGAAATGACAGTCAATTTGACCTCAGTGATGGTATCTTGACGTTAGTAGCCTTTTGGTCTGAACTCACTTCTACA  
GTTTATGCTCAATGTGACTTTTCTTCTTGTAAATACATTCCTTGAGAAGACATATACAGAAGATGCAGAGAAACAGGA  
CCAGCTTTTGAATCCCCAGACGGAGCTCATATGGGTGCTATGAGGCTGATGATCTGTTTCTCGTGCTCTACATTTCCA  
TATTCAATTGCTACCTGCTCTATCTTCTTCTATATGAGGAAGAATCTGAGAGCCAGGCCATTTGCATGATTATTAC  
TGCTGCTTACCCTCAGGACATCTGTCTCTCTCATTATCACACATCATAACTGAAAGCTAAAGCAAAGAAGATTTCT  
GTTTCTACAAGTAG

>Mumu-T2R5

ATGCTGAGTCTGACTCCTGTCTTAAGTGTCTATGAAGCCAAGATTTCAATTTCTGTTCCCTTCAGCCATGGAGTTTGC  
AGTGGGAATCCTGGCCAACGCCCTTCATTGTCTTGGTAAATGTTTGGGATGTGGTAAAAAGCAGCCCTTGAACAACTGTG  
ACATCGCACTGTGTGTCTCAGCATCACTCGGCTTTTCTGCAAGGCTTCTGCTTCTGGATGCTATTAGCTCGCCTGC  
TTCCAGCAGATGAAAGACCCACTGAGCCACAACACCAAGCCATCCTCACTCTCTGGATGATTGCAAAACCAAGTGAGCCT  
CTGGCTGGCTGCCTGCCTCAGTCTCCTCTACTGCTCCAAGATTGTCCGCTTCTCTCACACCTTTTCACTCCATGTAGCAA  
GCTGGGTCTCCAGGAGATTTCTCAGATGCTTCTAGTTGTTCTTCTCTCTCTGCTGCTGCACTGCCCTTTGTTTGTGG  
GACTTTTTTTGAGATCTCACTCCACGGTCACATCTCTACTGCACCTGAACAGCACAGAATTAGTTTGCAAATTGCAAA  
ACTCAATTTCTTTTACTCGTTTATCTTCTGCAATGTGGGCTCTGTCCCCCTTCTCTAGCTTTCTGGTTTCTCTGGGAG  
TGCTGTTATCTCCTGGGAGTCACATGAGGACTATGAAGTCCCAAACAGCAGCTCTGGTGACCCAGCCTTGAGGCC  
CACATCAGAGCCATCATATTTCTGATCTCCTTTTCTGTTTTTACGTGGTGTCAATCTGTGCTGCTTTAATATCAATACC  
CTTACTGATGCTATGGCACAATAAGGGGGAGTGATGATTTGTATAGGGATGATGGCAGCTTGCTCTTCGGGACATGCAG  
CCATCCTGATATCAGGCAATGCTAAGCTGAGGAGGGCCATAGAGACCATGCTATTCTGGTTTCAAAGCAGGCAAAAGGTG  
AGACCAGTCCACAAGGTTCTCCAGGACACTCTGA

>Mumu-T2R6

ATGGCTCAACCCAGCAACTACTGGAACAAGATGTGCTACCATTTGTCTATTTTGTATGTTAACACTTGTGGCCACTGAGTG  
CACCATAGGTATCATTGCAAGTGGGATTGTCTGGCTGTGAATGCAGTCTCATGGGTTGAGAAAAAGGCAATTTCCATAA  
CTACTAGGATTCTGCTTCTTCTGAGTGATCCAGAATAGGCCTCCAAAGCATCATGTTGATAGAAATTACCTCTCCATA  
TTCAACGTTGCTTTTTACAACAGTGTTTTATATAGAGTCTCAAAATGTAAGTTTTGTATTCTTAAATTATTGTAGTCTCTG  
GTTTGTCTGCTTGTCTTAGTTTCTTCCACTTTGTGAAGATTGCCAATTTTTCTTACCCCTGTTCTTCAAACCTAAAGTGGA  
GAATTTCTGAATTAATGCCCTGGCTTCTGTGGCTCTCAGTGTTATTTCTTCTCAGCTCCAGCATGTTCTTCTCAGCAAGCAC  
AAGTTCTAGTGGAACAACAACAATTCTTAAGTAACAACATCTGCAACTTCACAATGAACTTTACGTTGTTGAGACCAA  
TGTGGTCAATGTGTCTTTTTTATTCTATTTCCGGGAATACTCCCTCTTTGACAATGTTCTGCGCAACAGCTACTCTTCTGA  
TTTTTTCTCTCAGGAGACACACCCTGAACATGAGAAACAGTGCCACTGGCTCCAGAAACCCCTGCATAGAGGCTCATATG  
CAGGCCATCAAAGAACTAGCTGTTTTCTTTCTCTACATTTTAAATGCAGCTGCTCTGCTTCTGTCCACATCCAACAT  
AGTCGATGCTAGTCTCTTCTGGAGTATTGTATCAGAATTGTTCTGCCTGTCTACCCAGCTGGCCATTAGTTTTACTAA  
TTCAGAACAAACCTGGATTAAGAAGAACATGGAAGCATCTTCTAGTCTCAAAATTCATTTGACTTACAAAATAGATTCTGA

>Mumu-T2R7

ATGGCAATAATTACCACAAATCTGACTATTTTGTCTCACAGGTATGAAGTCATAATCCCTTTCTGGTCTCTACAATATG  
CTCTATTGTTGGCATCATTGGCAATGGCTTCTCACAGTCTATGGGACTGAATGGGTGAGGAGCAAAAGACTCCCCA  
CTGGTGAGAACCTTATGTTGATGCTGAGTTTTCCAGGCTGTTGCTACAGATATGGATGATGGTAGAGATTACTTATAGT  
CTACTTTTCCCGATCATTATATAACCAATGCCATGTATAAACTATTCAAAGCCATCTCTGTGTTTCTAACTACTGTAA  
CCTCTGGTTGCTGCTTGGCTCAATGTCTTCTATTGTCTTAAATTTGTGAAGTTAGTCTACCCCTCTGTTCTTCTCTGATGA  
AGCAGAAAAATCATAGGGCTGATGCCTCGGCTCCTGAGTCTGTCAAGTGTGGTTTCTTCTCAGCTTAAGTTCTTCTCTCT  
AAAGACATCTTAAATGTGTATGTGAACACTTCTGTTCCCATCCCTTCTTCCAACTCCACAAAGATGAAGTACATCTTTAT  
GATCAATGTAAGTCTAGCCTAGCTTTCTTGTATTATATGGGATCTTCTTCTTCTTGTCTATGTTCTATCATGGCAGCCACTC  
TGCTGATCACCTCAAGAGGCACACCCTGCACATGGAACAGCACCACAGGCTCTAGGGACTCCAGCATGGAGGCT  
CACGTGGGTGCCATCAATCGACCAGCCACTCTCTATTCTCTACATTATTAATGCACTGGCTTTATTTATTTCCATGTC  
AAACATCTTGGTGCTTACAGTGTCTGGAATAGTTGTGCAACATTATCATGACTGCCTATCCAGCCGGCCAGTCAGTGC  
ATCTGATCTTGAGAAATCCAGGCTGAGAAGAGCCTGGAGGCGGTTTCTAGCACCATGTTCTATCTTTACCTTAAAGGTAG

>Mumu-T2R8

ATGCCCTCCACCCACATTGATCTTCATTATCATCTTTTACCTGGTGTATTGGCCTCTATGTTGCAGAATGGCTTCAT  
GATGATTGTGCTGGGAGAGAGTGGATGAGGAACGGGACACTACCGGAGCTGACATGATTGTGGCTCTCTTGCTTCTCT  
CCCGGTTCTGCTTGCATGGGATCGCCATCCTGGCCAACCTCTTGGCCTCCTTGATTTTTGTTACCAAGCGAACCTTATT  
GGCATCCTCTGGGATTTCACTAACACTCTCATTTTTTGGCTTACTGCTGGCTTGGCATCTTCTACTGTGTGAAGATCTC  
CTCTTTCTCCACCTGTCTCTTTTGGCTCAAGTGGAGGATTTCCAGTTAGTTCCAGGCTGCTGGTTGTATCTCTCA  
TCATAGGTGGCCTGTGAGTGTCAATTCAGCCACCGGAACTTCATGGCCAATCAGATGACCATCTCCAGGGTTTCCAT  
GGAAACTGCACCTTTTGGTCACATGTCTGCACTGCACTTCTATCGGTACTATTACCTGTATCACTCAGTGCTCATGTGTTTAC  
TCCTTTCTTCTGTTTCTAGTGTCCGTTATCGTGCTCATGTTTCTCACTGTACCAGCATGTGGAGAAGATGAGGGGCCACA  
GGCCTGGGCTTGGGATCTCCATACTCAGGCACATACCATGGCTCTGAAATCCCTTACCTTCTTCTCATCTTTATATC  
TTTTTTTTCTTGGCCTGGTAATTTCTAGTACAAAAAGGAAAGCATGCAGAGTTACTATTGGGCCAGAGAGGCTATCAT  
CTACACAGGCATCTTTTTGAATCCATCATCTGCTGTTTGAACACCCCAACTGAGAAAGGCCCTGAAGATGAGGTTTT  
AG

>Mumu-T2R9

ATGAGCACAGGCCATACAGTTCTTGGATGTCAGACTACTGATAAGACAGTCGTCACCTTATTTATCATTTTAGTCCTTTT  
GTGCTGGTGGCAGTGGTAGGCAATGGATTTATCATTATAGCACTGGGCAATGAAATGGTTGCTCCGAGAACACTGTGAG  
CTCATAATAAGTTACTGATCAGTCTAGCAGCTCTCGATTCTGTCTCAATGTGTGGTGATAGGTAAGAATATTTATGTT  
TTCCTGAATCCAACAAGCTTCCCATACAACCTGTAATACAGCTCCTAAATTTAATGTGGGACTTCTTACTGCTGCAAC  
CATCTGGCTCTGTTCTTTGCTAGGTTTCTTCTATTGTGTGAAAATTGCAACCTTAACCCATCCTGTCTTGTCTGGCTAA  
AGTACAGGTTGCCTGGTGGGTACCATGGATGCTGCTCAGTGCTGTGGGATGTGAGCTTAAGTATCCTATGTTTC  
ATAGGCAATTATATGATATATCAGAACCATGCAAGAGTGGCCATCAACCTTGGAAATGCTACTGGGAATAGCTTAAGACA  
CTCACTTGAGAAATCTACTTCTTTCTATAAAGATAATCATGTGGACAATTTCCACTGTTGTCTTCTCAGCATCTTATGA  
GTTTGTCTCTCGTATCTTTGGTAAGACACATGAAGAAGACTTTCTTGGCCCTTTCAGAACTTCGGGATGTCTGGGCACAG  
GCCATTTCAAGGCTCTTCTCTCTGCTCTCTTCTCATCGTCTTTTCTCTCTCTGTTTCTGACGCTGGTACTCAGTTT  
TGCCAGCAACACACCATATCAGGAATTCAGTACTGGATGTGGCAGGTGGTGATTCTGTGACAGTGATACATCCCA

TTGTTATACTCTTCAGCAACCCTGTTTTGAGAGTGGTGATAAAGAGGGGCTGCTGCTGA

>Mumu-T2R10

ATGCTACCAACATTATCAGTTTTCTTCATGTTGACCTTTGTTCTGCTCTGTTTCTGGGGATCCTGGCCAACGGCTTCAT  
TGTGCTGATGCTGAGCAGGGAATGGCTACTGCGTGGTAGGCTGCTCCCTCGGACATGATCCTCTTCAGTTTGGGCACCT  
CCCGATTCTTCCAGCAGTGTGTGGGATTGGTCAACAGTTTCTATTACTTCTCCATCTGGTTGAGTACTCCGGGAGCCTT  
GCCCCGAGCTCATTAGTCTTCACTGGGACTTCTTGAAGTCAAGCACTTTCTGGTTTTGTACCTGGCTCAGCGTCTGTT  
CTGTATCAAGATTGCTAACTTCTCCATCCTGCCTTCTGTGGTTGAAGTGGAGATTCCAGCGTTGGTGCCCTGGTTCT  
TGTTGGGCTCTATCTTGGTGCCGTATTGTAACCTGCTGTTCTTTTGGGAAACCACACTATATATCAGGCATTCTTA  
AGGAGAAAAGTTTACTGGGAACACAACCTTTAAGGAGTGGAAACAGAAGGCTGGAAATAGACTATTTTCATGCCTCTGAAAGT  
TGTCACCATGTCAATTCTTGTCTCTTTTTCTGGTCTCAATTTTGCTGTTGATCAGTTCTCTCAGAAGGCATTTCGTAA  
GAATGCAGACAATACCCACAGCTTGAAGACCCCAACGTCCAGGCTCACAGCAGAGCCCTGAAGTCACTCATCTCATTC  
CTGGTTCTTTATGCGGTGTCCTTTGTGTCCATGATCATTGATGTACAGTCTTCATCTCCTCAGATAATGTGTGGTATTG  
GCCCTGGCAAATTATACTTTACTTTTGATGTCTGTACATCCATTTATCCTCATACCAATAATCTCAGGTTCCGGGCA  
CCTTCAGGCAGTACTCCTGTTGGCCAGGGATTCTGGTGGCCTAG

>Mumu-T2R11

ATGACATACGAAACAGATACTACCTTAATGCTTGTAGCTGTTGGTGAGGCCTTAGTAGGGATTTTAGGAAATGCATTCAT  
TGCACTGGTAAACTTCATGGGCTGGATGAAGAATAGGAAGATTGCCTCTATTGATTTAATCCTCTCAAGTGTGGCCATGT  
CCAGAATTTGTCTACAGTGATAATCCTATTAGATTGTATTATATTGGTGCAGTATCCAGACACCTACAACAGAGGTA  
GAAATGAGGACCGTTGACTTCTTCTGGACACTTACCAACCTTTAAGTGTCTGGTTTGCCACCTGCCTCAGCATTTTCTA  
TTTATTCAAGATAGCAAACCTTCTCCACCCTCTTTTCTCTGGATAAAGTGGAGAATTGACAAGCTAATTCTCAGAACTC  
TACTGGCATGTGTGATTATCTCCCTGTGTTTTAGCCTCCAGTCACTGAAAATCTGAGTGATGATTTTCAGACGTTGTGTT  
AAGACAAAGGAGAGAATAAATCTACTTTGAGATGCAAAGTAAATAAAGCTGGACATGCCTCTGTCAAGGTAATCTCAA  
CTTGGTCATGCTGTTCCCTTTCTGTGTCTCTGGTCTCCTTTCTCTCTTCTGATCCTCTCCCTGTGGAGACACACAGGC  
AGATACAACCTCAGTGAACAGGGTACAAAGATCCAGCACAACAGCTCATGTGAAAGCCATGAAAGCAGTAATTTCTTTC  
CTGGCCCTGTTTGTGTCTACTGCTAGCCTTTCTCATAGCCACCTCCAGTACTTTATGCCAGAGAGTGAATTAGCTGT  
AATATGGGGTGAGCTGATAGCTTAATCTATCCTTCAAGCCATTCATTTATCCTCATCCTGGGGAGTAGTAACTAAAC  
AAGCATCTGTGAGGGTGCTTTGTAGAGTAAAGCATGTTAAAGGGAAAAAATATTAG

>Mumu-T2R12

ATGCTGAATTCAGCAGAAGGCATCCTCCTTTGTGTTGTCACTAGTGAGGCTGTGCTCGGAGTTTTAGGGGACACATATAT  
TGCACTTTTTAACTGCATGGACTATGCTAAGAACAAGAAGCTCTCTAAGATCGGTTTCATTCTCATTGGCTTGGCGATTT  
CCAGAATTTGGTGTATTGGATAATAATTTTACAAGGGTATATACAAGTATTTTTTCCACACATGCTTACCTCTGGAAC  
ATAACTGAATATATTACTTACATATGGGTATTTCTCAATCACTTAAGTGTCTGGTTTGTACCAACCTCAACATCCTCTA  
CTTTCTAAAGATAGCTAATTTTTCCAACCTGTATTTCTCTGGTGAAAAGGAGAGTCAATGCAGTTTTTATCTTTCTGT  
CAGGATGCTTACTTACCTCATGGTTACTATGTTTTCCACAAATGACAAAGATACTTCAAAATAGTAAATGCACCAGAGA  
AACACATCTTGGGTCCACAGCGGAAAAATTACTTTCTTATTAACCAAGTGTGACCAATCTGGGAATCTTTTCTTCAT  
TATTGTATCCCTGATTACCTGCTTTCTGTTGATTGTTTTCTCTGGAGACATGTGAGACAAATGCATTGAGTGTTCAG  
GATTCAGAGACCACAGCACAAGTACATGTGAAAGCTATGAAATTTCTAATATCTTTATGGTCTTCTTTATCTGCAT  
TTTGTAGGCCTTTCCATAGAAGTGCTATGCTTTATCTGCCACAAAATAAAGTCTCTTTATAACTGGTTTGACAGCCAC  
ATGCCTCTATCCCTGCGTCACTCAATCATCGTAATTTTAGGAAATAAGCAGTTAAAGCAAGCCTCTTTGAAGGCACCTGC  
AGCAACTAAAATGCTGTGAGACAAAAGGAAATTTAGAGTCAAAATA

>Mumu-T2R13

ATGCTGACTGTAGCAGAAGGAATCCTCCTTTGTTTTGTAAGTAGTGTTGAGTCTGGGAGTTCTAGGAAATGGATTTAT  
CCTGCATGCAAACTACATTAAGTGTGTCAGAAAGAAGTTCTCCACAGCTGGCTTTATCTCACAGGCTTGGCTATTTGCA  
GAATCTTTGTCATATGTATAAATCTCTGATGGATATTTAAAATTGTTTTCTCCACATATGGTTGCCTCTGATGCCAC  
ATTATAGTGATTTCTTACATATGGGAATTAATCAATCATACAAGTATATGGTTTGCACACAGCCTCAACCTCTTCTATCT  
CCTGAAGATAGCAAATTTTTCTCACTACATCTTCTCTGCTTGAAGAGAAGAATCAATACAGTATTTATCTTTCTCTTG  
GATGCTTATTTATATCATGGTCAATTGCTTTCCACAAACAGTGAAGATATTTAATGTTAAAAAGCAGCACAGAAATGTT  
TCCTGGCAGGTTTACCTCTATAAGAATGAGTTCAATTGTAAGCCACATTTCTCTCAACCTGGGAGTTATATTTCTCTTAT  
GGTGGCTATCATTACATGCTTCTATTAATTTATTTCACTTTGGAACATAACAGAAAGTGCAGTTGTATGCCTCAAGAT  
TCAAAAGCCTTAACACAGAAGTACATGTGAAAGTCAAGGTTTTAATTTCTTTTATTATCCTGTTAATCTTGCAATTC  
ATAGGGATTTTGATAGAAACATTGAGCTTTTTAAATATGAAAATAAAGTCTACTTATTTTGGGTTTGATAATTTTCATG  
CATGTATCCTTGCTGCTCATTATTTATCCTAATTCTAGCAAACAGTCAAGTGAAGCAGGCTCTTTGAAGGCACCTGAAGC  
AATTAATATGCCATAAGAAAGACAAGGACGTGAGTGACATGTTAG

>Mumu-T2R14

ATGCTGAGTGCACTGGAAGCATCCTCTTTCTGTTGCCACTAGTGAAGCCATGCTGGGAGTTTTAGGGAACACATTTAT  
TGTACTTGTAAACTACACAGATGGGTGAGGAATAAGAACTCTCTAAGATTAACCTTATTTCTCACTGGCTTAGCAATTT  
CCAGGATTTTTACCATATGGATAATAAATTTAGATGCATATACAAGGTTTTCTCTGACTATGCTTATGCCGAGCAGT  
CTACATGAATGCATGAGTTACATATGGGTAATTATTAACCATCTGAGCGTTTGGTTAGCACCAGCCTCGGCATCTTTTA  
TTTTCTGAAGATAGCAAATTTTTCCCACTACATATTTCTCTGGATGAAGAGAAGAGCTGATAAAGTTTTTGTCTTTCTAA  
TTGTATTCTTAATTATAACGTGGCTAGCTTCTTTCCGCTAGCTGTGAAGGTCATTAAAGATGTTAAATATATCAGAGC  
AACACATCCTGGCTGATCCACCTGGAGAAGAGTGAAGTACTTATAAAGTATGTTTTGCCAAATATGGGGCCCATTTCCCT  
CTTTATTGTAGCCATAATTGCTTGTCTTGTAAACATTTCCCTTTGGAGACACAGCAGGCAGATGCAATCCATTGGAT  
CAGGATTCAGAGATCTCAACACAGAAGCTCATGAAAGCCATGAAAGTTTTAATTGCAATTTATCATCCTCTTTATCTTA  
TATTTTTTGGGTATTCTCATAGAAACATTATGCTTGTCTTACAAACAATAAAGTCTCTTTATTTTTGGCTTCACTTT  
GTCAGCCATGTATCCCTGTTGCCATTCCTTTATCCTAATTTCAACAAGCAGGAGCTGAAGCAAGCCACTATGAGGGCAC

TGCAGAGATTAAATGCTGTGAGACTTGA

>Mumu-T2R15

ATGCTGAGTGC GG CAGAAGGCATCCTCCTTTCCATTGCAACTGTTGAAGCTGGGCTGGGAGTTTTAGGGAACACATTTAT  
TGCACCTGGTAAACTGCATGGACTGGGCCAAGAACAATAAGCTTTCTATGACTGGCTTCCTTCATCGGCTTAGCAACTT  
CCAGGATTTTTATTGTGTGGCTATTAACCTTTAGATGCATATGCAAAGCTATTCTATCCAAGTAAGTATTTTTCTAGTAGT  
CTGATTGAAATCATCTCTTATATATGATGACTGTGAATCACCTGACTGTCTGGTTTGCCACCAGCCTAAGCATCTTCTA  
TTTTCTGAAGATAGCCAATTTTTCCGACTGTGATTTCTCTGGTTGAAGAGGAGAACTGATAAAGCTTTTGTTTTCTCT  
TGGGGTGTGGCTAACTCATGGGTAATCTCCTTCTCATTGTGTGAAGGTGATGAAGGACGGTAAAGTGAATCATAGA  
AACAGGACCTCGGAGATGACTGGGAGAAAAGGCAATTCATTAATACTACGTTTTCTCAATATTGGAGTCATTTCTCT  
CTTTATGATGACCTTAACCTGCATGTTTCTTGTAATTATGTCACTTTGGAGACACAGCAGGCAGATGCAGTCTGGTGT  
CAGGATTCAGAGACCTCAACACAGAAGCTCATGTGAAAGCCATAAAATTTTTAATTTCAATTTATCATCCTTTTCGTCTTG  
TATTTTATAGGTGTTTCAATAGAAATATCTGCATATTTATACCAGAAAACAACTGCTATTTATTTTTGGTTTCACAAC  
TGCATCCATATATCCTTGCTGTCACTCATTTATTCTAATTTCTATCTAACAGCCAGCTAAAGCAAGCCTTTGTAAGGTAC  
TGCAAGGATTAAAGTTCTTTTAG

>Mumu-T2R16

ATGCTGAGCACAATGGAAGGTGTCTCCTTTCACTTTCACTAGTGAGGCTGTGCTGGGCATTGTAGGGAACACATTCAT  
TGCACCTGTAAACTGTATGGACTATAACAGGAACAAGAAGCTCTCTAATATTGGCTTTATTTCTACTGGCTTGCCAATTT  
CCAGAATTTGCCCTGTGTGATCTTAATCACAGAGGCATACATAAAAAATATTCTATCCACAGTTGCTGTCTCCTGTCAAC  
ATAATTGAGCTCATCAGTTATCTATGGATAATTATCTGTCAATTGAATGTCTGGTTTGCCACTAGTCTCAGTATTTTTTA  
TTTTCTGAAGATAGCAAATTTTTCCCACTACATATTTGTCTGGTTAAAAAGAAGAATTGATTAGTTTTTTTTCTTCTGA  
TAGGGTGCTTGCTTATCTCATGGCTATTTTCTTCCAGTTGTTGCGAAGATGGTTAAAGATAATAAAATGCTGTATATA  
AACACATCTTGGCAGATCCACATGAAGAAAAGTGAGTTAATCATTAATACTATGTTTTACCAATGGGGGAGTATTTTTATT  
TTTTATGATAATGTTAATTGTATGTTTCTGTAAATCATTTCACTTTGGAGACATCGCAGGCAGATGGAATCAAATAAAT  
TAGGATTCAGAGATCTCAACACAGAAGTTTCTGTGAGAACAATAAAAGTTTTATTGTCTTTTATTATCCTTTTATATTG  
CATTTTATGGGTATTACCATAAATGTAATTTGTCTGTTAATCCAGAAAGCAACTTGTATTATCATGTTTGGTTTGACAAC  
TGCATTCATCTATCCCGCTGCCACTCACTTATCTAATTTCTAGCAACAGTCGGCTGAAGCAGTGCTCTGTAATGATAC  
TGCAACTATTAAGTGCTGTGAGAATGGTAAAGAACTCAGAGACACATGA

>Mumu-T2R17

ATGAATTTGGTAGAATGGATTGTTACCATCATAATGATGACAGAATTTCTCTTAGGAACTGTGCCAATGTCTTCATAAC  
CATAGTGAACCTTCATCGACTGTGTGAAGAGAAGAAAGATCTCCTCAGCTGATCGAATTATAACTGCTATTGCCATCTTCA  
GAATTTGGTTTGTGTGGCAATGTTAACGAACTGGCAATTCAGATGTTTACTCCAGACACAGACAATTTACAATAAGAGA  
GTTTTCGGTGGAATTACCTGGGCTATAACCAACCATTTTACCCTTGGCTGGGGACCATACTGAGCATGTTTTATTATT  
CAAGATAGCCAATTTTTCCAACAGTCTATTTCTTCATCTAAAAAGAAAACCTGACAATGTTCTACTTGTGATTTTCTGG  
GATCGTCTCTGTTTTGGTTGCATATCTTGGGATGGTGAACATCAAGAAGATTGCTTGGATGAGTATTCATGAAGGAAAT  
GTGACCACAAAGAGCAAACCTGAAGCATGTAAACAAGCATCACAAATATGCTTCTCTCAGCCTGATAAACATTGTACCATT  
TGGTATATCACTGAACCTGTGTTCTGCTCTTAATCTATTCCTGAGTAAACATCTCAAGAATATGAAATTCATGGCAAAG  
GATGTCAAGATCAGAGCACCATGGTCCACATAAAGGCCCTTGCAAACCTGTGGTCTCTTTCTCTTGTATATGCCACATAC  
TCTTCTGTGTCTATTATATCAGGTGGAGTTTGCAAAATGCACCAGTCTTCTGTTTTGTGTGACAATTGGATCCTTCTA  
CCCAGCAGTTCATCTTGATCTTGATTGGGGAACACAGAACTTAAACAGGTCTTCTGTTGTTGCTGAGGCAGATGA  
GATGCTGA

>Mumu-T2R18

ATGGGAAGCAATGTGTATGGTATCTTAACATATGGTTATGATTGCAGAGTTTGTATTTGGAAATATGAGCAATGGATTAT  
AGTGTGATAAACTGCATTGATTGGGTGAGGAAAGGAACTCTTCTTCCATTGGTTGGATCCTGCTTTTCTTGGCCATTT  
CAAGAAATGGTGTTGATATGGGAAATGTTAATAACATGGATAAAATATATGAAGTATTCATTTTCTTTTGTGACTGGAACA  
GAATTACGGGGTATCATGTTTACCTGGGTAATTTCCAATCACTTCAGTCTCTGGCTTGCCACTATTCTCAGCATCTTTTA  
TTTGCTCAAAATAGCCAGTTTCTCCAACCGGTTTTCTCTATTTGAAGTGGAGAGAGAAGAAAGTCTTCTGATTGTCC  
TTCTGGGAAATTTGATCTTCTGATGCTCAACATATTACAAATAAACAAACATATAGAACACTGGATGTATCAATATGAG  
AGAAATATAACTTGGAGTTCTGAGATGAGTTCAGGTTTTCAGGTTTCTCAAACTGCTTATTGGAGATGATTGTGTTCTC  
TGTAACACCATTCACAGTGGCCCTGGTCTCTTCTCTCTGTTAATCTTCTCTTGTGGAACATCTACAGAAAATGCATC  
TCAATTCTAGAGGGGAACGAGACCCAGCACTAAAGCCCATGTGAATGCCTTGAGAATTATGGTCTCCTTCTCTTACTC  
TATGCCACTTACTTCATATCTTTTTTCTATCATTGATTTCCCATGGCACATAAAACACGACTGGGTCTTATGTTTAGCAT  
AACTGTTGGGCTTTTCTACCCTTCAAGCCACTCATTTATCTTAATTTTGGGACATTCATTTTAAGGCAAGCCAGTCTTT  
GGGTGATGACATATCTTAAATGTGGGCAAAAGCATTAG

>Mumu-T2R19

ATGTCGAGCCTACTGGAGATTTTCTTTGTGATCATTTTCGGTTGTAGAATTCATAATAGGAACTTTGGGAAATGGATTAT  
TGTCTGTATAAAGCACTACTTCTTGGTTCAAGAATCAGAAAATCTCTGTAATTGATTTCACTTCTTACTTGGTTGGCCATCT  
CCAGAAATGTGTGTTCTATGGACAACAATTGCTGGTCCCTCTCAGGAAATCTACAAGACGTTAAGTTACTCTAAGAAAT  
TTCAAATTTTGTGTTGACATTATCTGGACAGGATCCAATATTTATGCATAGCCTGTACAACGTGCATCAGTGTCTCTA  
CTTGTTCAGATTGCCAATTTTCTAATTCATTTTCTTCTGGATTAAACAGAGAATTATGCAGTACTTCTGGCTATTG  
TCCTAGGCACACTCATGTATTTCAATTTATTTCTATTTTATGAAAATGATAGCTAATAATTTTATCTACAAATGGACA  
AAATTGGAACAAAACACAACTTCCCTGTTTTAGATACTCTAAGTGGTTTCTAGTCTACCATAGCCTCTACAATGGGAT  
TCTCATTTTCTTTTTATAGTGTCTCTGACCTCATTTCTTCTTTAATCTTCTCTTATGGAGCCACCTTAGGAGGATGA  
AACTACAGGGCATACATACCAAGACATAAGCACAGAAGCACATAAAAGCTATGAAAATATGATGTCAATTCCTTTTG  
TTCTTCATCATATATTATATTAGCAACATTATGCTTATGTGGCAAGCTCCATTCTTGACAATGTGGTTGCACAAATTTT  
CTCTATAACCTAATATTTCTGATTTATCTGTTTCATCCTTTTCTTCTGGTTTTATGGAACAGCAAAATGAAATGGACAT

TCCAGCATGTATTGAGAAAGCTGGTGTGTCATTGTGGAGTTATTCTTGA

>Mumu-T2R20

ATGTGTGCTGTTCTACGTAGCATACTGACAATCATTTTCATTTTGGAGTTCTTCATTGGAAATCTGGGGAATGGATTCAT  
AGCTCTGGTACAATGCATGGACTTACGAAAGAGAAGAACGTTCCCTTCAGCAGATCATTTCTCTACTGCTCTGGCCATCT  
CCAGGCTTGCTCTGATATGGGTTTTATTTCTAGATTCATTTCTGTTTATACAATCCCCATTACTGATGACTAGAAATACA  
TTAAGACTGATTAGACTGCCTGGAATATAAGCAATCATTTTCAGTATATGGTTTGCTACCAGCCTCAGCATCTTTTATCT  
CTTCAAGATAGCCATTTTTCTAACTATCTTTCTCTACCTGAAGCGGAGAGTTAAAGGGTGGTTTTGGTGATACTGC  
TGCTATCCATGATCCTTTGTTTTTAATATATTTTGAATCAACATATTGATGCTGGATCTATGGAACCAAAAGA  
AACATAACTAATGGTTGAGTTCAACACGTTTTTCAGAGTTTTCCAGGCTTATTTAATTCCAAGTTAATGTTACATT  
AGTACCCTTTGGTGATCCTTGATAGCTTTCTCTCTCTAATCTTTCCCTTATGAAACATGTAAGGAAGATGCAGTACT  
ACACCAAGGATGCAAGATGTCAGAACCATGGCCACACCACAGCCTGCAGACTGTGGTTGCCTTCTCTCTATTATAT  
ACTACTTTCTTTCTGCTCTAGTTGTGGAAGTTTCAACACTTGAATGGATGAAAGTCTGATGCTTCTGTTTGCAAAAGT  
TACTATAATGATTTTTCTTCCATCCACTCTGTATTTTCATTTTGAACATAATAAGTTGAGACAGGACTTGCTTTTCAG  
TACTGAAGTGGCTACAGATTGGTGCAAGCGTGAGAAAACCTTGGATTACATG

>Mumu-T2R21

ATGGTACCTGTTCTGCACAGTCTCTCCACCATCATACTAATTGCAGAGTTTGTGGGGAAATTTGAGCAATGGTTTGAT  
AGTGTGAAGAACTGCATTGACTGGATCAATAAAAAAGAGCTCTCCACAGTTGATCAATACTCATTGTCTTGCAATTT  
CAAGAATTAGTCTCATCTGGGAAACACTAATTATATGGGTTAAAGATCAACTAATTCATCTATTACTATTGAAGAATTA  
AAAATAAATTGTGTTGAGCTTTATACTATCTAGCCACTTCAGTCTCTGGCTTCTACAGCTCTCAGCATCTTCTATTATT  
CAGAATACCTAATTGCTACTGGCAGATCTTCTCTACTTGAAATGGAGAATAAAGCAACTGATTGTCCACATGCTTCTGG  
GAAGCTTGGTGTCTTGGTTGCAATATGATACAGATAACCATCACTCTGAAGAGAGGTTCTATCAATATGGAGGAAAT  
ACAAGTGTAATTCATGGAGACTGAGTTCTCAATTTTGATAGAGCTGATGTTATTAAACATGACTATGTTCTCCATTAT  
ACCATTTTCATTGGCCTTAATTTCTTTCTCTGCTAATCTTCTTTATGGAAACATCTCCAGAAGATGCCACTCAATT  
CTAGAGGAGATAGAGACCCTAGTGCTACGGCCACAGAATGCCTTGAGAATTTGGTCTCCTTCTTGTCTATACT  
ATATATTTCTGTCTCTTCTATATCATGGTTGCTCAGAAGAATCAAAGTGAAGTGTTCACATTATTTGTATGATAAC  
TTCATTGTGTATCTTCTTCCACTCATATATCTGATTCTGGGAAATTATAAATTAAGCAGACCTCTCTTGGGTAA  
TGAGGCAGCTGGGATGTAGGATGAAAGACAGAATACACCAACTACATAA

>Mumu-T2R22

ATGGAATCTGTCCTTCACAACCTTGCCACTGTACTAATATACGTGGAGTTTATTTTTGGGAATTTGAGCAATGGATTCAT  
AGTGTGTCAAACCTCTTGACTGGGTCAATAACAAAAGCTTTCTTAATAGATAAAATTCCTTACATTGGCAATTT  
CAAGAATCACTCTCATCTGGGAAATATATGCTTGGTTTAAAGTTTATATGATCCATCTTCTTTTTAATTGGAATGAA  
TTTCAAATTTATTTTATTTAGCTGGGTCTTTCTAGTCACTTCAGCCTCTGGCTTGCCACAACCTCTCAGCGTCTTTATTT  
ACTCAGAATAGCTAACTGCTCTGGCAGATCTTTCTTATTTGAAATGGAGACTTAAACAACCTGATTGTGGGATGTTGC  
TGGGAAGCTTGGTGTCTTGGTTGAAATCTGATGCAAGCATGCTTGAAGAGAGGTTCTATCAATATGGAAGGAACACA  
AGTGTGAATACCATGAGCAATGACCTTGCAATGTGGACCGAGCTGATCTTTTCAACATGGCTATGTTCTCTGAATACC  
ATTTACATTGGCCTTGATTTCTTTCTCTGCTAATCTTCTCTTGTGGAAACATCTCCAGAAGATGCAGCTCATTTCCA  
GAAGACACAGAGACCCTAGCACCAAGGCCACATGAATGCCTTGAGAATTATGGTGTCTTCTCTTGTCTATACCATG  
CATTTCTGTCTCTTCTATATCATGGATTGCTCAAAAGCATCAGAGTGAAGTGGCTGATATTATTGGTATGATAACTGA  
ACTCATGTATCTTTCAGTCCATTCTGTATCTGATTCTAGGAAATCTAAATTAAGCAGACTTCTCTTGTATGCTGA  
GGCATTTGAGATGTAGGCTGAAGGAGAGAATATCACAATTGCATATAGCAACCAATAACTAGCTTTTGTGTATTCTGT  
GTTGCAAAACAAATCTATGAGGTAG

>Mumu-T2R23

ATGATGAGTTTCTTGTAAGCATTGCATCCATTGCAATGCTGGTGAAAATTGTTCTTGGAACCTTGCCAATGTCTTCAT  
TGTTCTGGTAAACTTCATGACTGCATCAAGAAAAGAAAATTCCTCTTAGCTGATAGAATTCCTACTGTTCTGGCTATCT  
TCAGGTTTGACTTGCTTTGGATAATATTAATGAATTGGAGCTCAAGTGTGTTTCATGTAGGTTTGATTTTCCAAGTAAGA  
TTTTGTATTTGTGTTGCTGGATAGTAACCAACCATTTTAATACATGGCTTGCAATATACTCAGCATACTTTATTTGTT  
GAAGATAGACAATTTCTCAAATCTTATTTTCTTGGCCTGAAAGGAAAAATTAAGTGTCTTATATTGTAATTTGCCAT  
GTTTTGTGCTTTTATTTCTTAATCTTAAATGGTAACCATATGTGAGACAACACAAGCAATGGACACCAGGCAACTTG  
ACTGGGAAGACAAAACCTGATTATTTTACGAACCTTATAGCTATGACTTTCCTCTAGGCAGTTTAGTTCCTTACCAC  
ATTCATGATCTGTTTCTTCTTAATCTGTTCTCTGTGTAACACCTTAGGACAATGAGGCTTATGGAAAAGGATCCC  
AGGGCCCCAGTGCTTCAACCCACATTAAGGTTTTGCAAGTTTGATCTCATTTCTGTTGTTATTCTCCATGTTTATTCTG  
TTGCTAATCATATCAGATTACAATTATACAAAGTCTCTGGAGGAACCAATCCACCTGATTGGCAGGTTATTGGAACCTT  
GTATCCTTCAAGACATTCTATATCTTGCTATGGGGAACAAGAGGATCAACAGGCCTTTGTGTTGGAATGTTTCAGG  
TGAGAGCAAGGTTCTGGCTGAAAGAAAAGAAACCTTGA

>Mumu-T2R24p

ATGCAGCATCTTTTAAAGATAATATTTGCTATCTCCACAGCACTCTTGCAATGATTTTCATCATGGAATTAGTAAGTGA  
AATTATAGGAATGGTTTGATGGCCCTGGTGCACTATATGGACTGGGTAAAGGAAAAAGAAAATGCCATTAGTTAATCAAA  
TCTTCATCACTTTTTAGTCTCCAGAATTTTTCTCTCAGTTTATTGTTTATAAGTTTAGTCATCTTCTTTTCATATCCA  
GATGCAATTATAACTCCAGGATGATACATGTTATTAATAATGTTTGGATTATAGTAAACAATTTCTCCATCTGGCTTGC  
TACCTGCCTCAAAGTCTTTATTTTCTCAAGATATACGATTTTCTAACTCTCTTTTCTTGTCTAAAGTGGAGAGTTG  
AAGAAGTAGTTTCAGCAACACTGCTGGTGTCACTGGTCTCCAGATTTTAAATATTTTACTATGTAAGTGGAAATTAAC  
ATATGCAATTAATGAATATAAAAGAAACATATCTTGCAACTTCAGTCTCTATTACCAAGCAAAATTGCAAGTAACGTGTT  
AAGCTTTCACATTATTTTCTGTCTGTCCCTTTGTTTTATCTTGTGCGATGTTTTTTCTGCTCATTTTCTCCCTGTGG  
ACACTTCACAAGAGGATGCAGCAGCATGTTTCAGGAGGCAAGATGCCAGAACCATGGCCCACTTCAAAGCCTTGAAAA  
CATGATTGCCCTTCTCTACTATACTCTATTTTTATTCTGTCTGCTTAGTACTTACTAA

>Mumu-T2R25p

ATGAAGCACTTTTGAAGATATTATCTGTTATCTCCAGAGCACACTTTCAGTCATTTTAAATCGTGGAATTAGTAATTGG  
AATTATAGGAAATGGGTTTCATGGTCTGGTCCACTGTATGGACTGGGTTAAGAAAAAGAAATGTCCCTAGTTAATCAAA  
TTCTTACTGCTTTGTCAATCTCCAGAATTTTTCAGCTCTGTTTATTGTTTATAAGTTTAGTAATCAACTTTTCATATACA  
GATTTAACTACAAGTTCAAGGATGATACAAGTCATGTACAATGCTTGGATTTTAGCCAACCATTTTCAGCATCTGGATTGC  
TACATGCCTCACTGTCCTTTATTTTCTAAAGATAGCCAATTTTCTAACTCTTTTTTCTTTATCTAAAGTGGAGAGTTG  
AAAAAGTAGTTTCAGTTACACTGTTGGTGTCTCTCTGATTTTAAATTTTTACTAACTAACTTGGAAACCGAC  
ATGTGGACAAATGAATATCAAAGAAACATATCATGCAGCTTCAGTTCTCATTACTATGCAAAGTGTACAGGCAGGTGT  
AAGGCTTCACATTATTTTCTGTCTGTCCCCGTGTTTGTCCCTGTCAACTTTTCTCTGCTCATCTTCTCCCTGTGGA  
CACATCACAAGAGGATGCAGCAGCATGTTCCAGGGAGGCAGAGATGCCAGAACCACGGCCCACTTCAAAGCCCTACAACT  
GTGATTGCATTTTCTCTACTATATTCATTTTATTCTGTCTGTCTTAATACAAATTTGGAATATGAATTACTGAAGAA  
AAATCTTTTCTGTTGATTTTGTGAGGTTGTATATAGCTTTTCCGACATTCATTATATCTGATTGTAGGAGACA  
TGAAGCTGAGACAGGCCTGCCTGCCTCTCTGTATTATCGCAGCTGAAATTCAGACTACACTATGTAGAAATTTAGATCA  
CTAA

>Mumu-T2R26

ATGTTTTACAGAAAATAAACTACAGCCATTTGTTTACTTTTTCAATCACCTTGTATGTGGAAATAGTAACGGGAATCTT  
AGGACATGGATTCATAGCATTAGTGAACATCATGGACTGGGTCAAAGAAGAAGGATCTCTTCAGTGGATCAGATTCTCA  
CTGCTTTGGCCCTTACCAGATTCATTTATGTCTGTCTATGCTGATTGTCATATTGTTATTCATGCTGTGCCACATTTG  
CCTAGGAGATCAGAAATGCTTTCAGCAATGGGTATTTTCTGGGTAGTCAACAGCCATTTTAGCATCTGGCTTACTACATG  
CCTCGGTGCTTTTATTTTCTCAAGATAGCCAATTTTCTAACTCTTTTTTCTTTATCTAAAGTGGAGAGTTAAAAAAG  
TGATTTTAATAAATCCTGGCATCACTGATTTTCTTGACTTTACACATTTTATCTTTAGGGATATATGATCAGTTCTCA  
ATTGCTGCTTATGTAGGAAATATGCTTATAGTTTGACAGATTTAACACAATTTTCCAGTACTTTCTTATTCTCCAACCT  
ATCCAATGTTTTCTTAATCACCACATCATCCCATGTTTTCTTACCATCAACTCCCTGTTTCATGCTCATACCCCTTCACAG  
TGTCCCTGGTAGCCTTCTCATGCTCATCTTCTACTGTGGAAGCATCACAAAAGATGCAGGTCAATGCCAAACAACCT  
AGAGATGTCAGTACTATGGCCACATTAAGCCTTGCAAACCTGTGTTCTCTTCTGCTGCTGTATGCCATATACTTACT  
TTTCTTATCATAGGAATTTGAACCTTGGATTGATGGAGAAAATAGTGATACTGATATTGACCACATTTCTGGAGCAG  
TTTTTCTATAAGCCACTCATTTGTACTGATTCTGGGAAACAGTAAGCTGAGACAAGCCAGTCTTCTGTGTTGCCTGT  
CTAAGGTGCCAGTCCAAAGATATGGACACCATGGGTCTCTAG

>Mumu-T2R27

ATGAATGGTGTCTACAGTTACATTTATAGTCATTTTGTGAGTGTGGAATTTATAATTGGCATCTTTGGCAATGGATTCAT  
AGCGGTGGTGAACATAAAGGACTTGGTCAAGGGAAGGAAGATCTCTTCAGTGGATCAGATCCTCACTGCTCTGCCATCT  
CCAGAATTGCACTGCTGTGGTTAATATTAGTAAGTTGGTGGATTTTGTGCTTTACCCAGGACAATGGATGACTGATAGA  
AGAGTTAGCATAATGCACAGTATATGGACAACATTAACCCAGAGTAGTCTCTGGTTTGTACAAGTCTCAGCATCTTTTA  
TTTTTCAAGATAGCAAATTTTCCAACCTATTTTCTTTATTTAAAGGTGAGACTTAAAAAGTCATGATAGGGACAT  
TGATAATGCTTTGATTCTCTTTGTTTAAATATTATCATTATGAATGCACCTGAGAACATTTTAACTACTGAATATAAT  
GTATCTATGTCTTACAGCTTGATTTTGAATAACACACAGCTTCTATGCTGTTTCCATTTGCCAACACCATGTTTGGGT  
CATACCTTTTGTGTGCTCACTGGTCACTTTTGTCTTCTTGTGTTTCTCCCTGTGGAACATCAGAGAAAAGATGCAACACA  
GTGCCCATGGATGCAGAGATGCCAGCACTAAGGCCACATCAGAGCCTTGACAGACATTGATTGCCTCCCTCCTCTGTAT  
TCCATTTTCTCTGTCTCATGTTATGAAGTTTGGAGTGCTGCTTCTGGAGAGGACACTCCTGCTTTTGATCACACA  
GGTTGCAAGAACAGCTTTTCCGTCAGTGCATCTCGGTGCTGATTCTGGGCAATGCTAAGATGAGAAAAGGCTTCTCTCT  
ATGTATCTCTGTGCTGAGGTGCAGGCACAAAGAATGA

>Mumu-T2R28

ATGTTCTCACAGATAATAAGCACCAGTGATATTTTACTTTTACAATAATATTATTGTGGAATTAGTAATAGGAATTTT  
AGGAAATGGATTCATAGCACTAGTGAATATCATGGACTGGACCAAGAGAAGAAGCATTTTCATCAGCGGATCAGATTCTCA  
CTGCTTTGGCCATTACCAGATTTCTCTATGTGTGGTTTATGATCATTGTATATTGTTATTCATGCTGTGCCACATTTG  
CTTACAAGATCAGAAATAGTAACATCAATTTGGTATTATTTGGATAGTGAATAACCATTTTCAGCGTTTGGCTTGCCACATG  
CCTCGGTGCTTTTATTTTCTGAAGATAGCCAATTTTCTAACTCTTTGTTTCTTTACCTAAAGTGGAGAGTTAAAAAAG  
TAGTTTTAATGATAATAACAGGTATCAATGATTTTCTGTTTAAACCTGTTATCTCTAAGCATGTATGATCAGTTCTCA  
ATTGATGTTTATGAAGGAAATACATCTTATAATTTAGGGGATTCAACCCCATTTCCACAAATTTCTTATTATCATATTC  
ATCAAAAGTTTTCGTAATCACCACATCCCATATTTTCTTACCCATCAACTCCCTGTTTCATGCTCATACCTTCACAG  
TGTCCCTGGTAGCCTTCTCATGCTCATCTTCTACTGTGGAAGCATCACAAAAGATGCAGGTCAATGCCAAACCACCT  
AGAGATGCCAGCACCATGGCCACATTAAGCCTTGCAAACAGGGTTCTCCTTCTGCTGCTGTATGCAGTATACTTACT  
TTTTATTGTATAGGAATGTTGAGCCTTAGGTTGATAGGAGGAAAATTAATACTTTTATTTGACCACATTTCTGGAATAG  
GTTTTCTATAAGCCACTCATTTGTGCTGATTCTGGGAAATAACAAGCTGAGACAAGCCAGTCTTTCAGTGTTGCATTGT  
CTGAGGTGCCGATCCAAAGATATGGACACCATGGGTCCATAA

>Mumu-T2R29

ATGGTGGCAGTTCTACAGAGCACACTTCCAATAATTTTTCAGTATGGAATTCATAATGGGAACCTTAGGAAATGGATTCAT  
TTTTCTGATAGTCTGCATAGACTGGGTCAAAGAAGAAAAATCTCTTAGTGGATCAATCCGCACTGCTCTGGCAATTA  
GCAGAATCGCTCAATTTGGTTGATTTCTAGATTGGTGGGTGTCTGTTTATTACCCAGCATTACAGAACTGGTAAG  
ATGTTATCAACATATTTGATTTCTGGACGGTGATCAATCATTGTAACCTTTGGCTTACTGCAAACCTTGAGCATCTTTTA  
TTTTCTCAAGATAGCCAATTTTCTAACATATTTTCTTTATCTAAAGTTTAGATCTAAAAATGTGGTATTAGTGACCC  
TGTTAGTGTCTATTTTTCTTGTTCTTAAATACTGAATTATAAAAAATTTTTCTGATGTGTGTTTGTATAGTGTTCAA  
AGAAATGTGTCTCAATTTTCTAATGTATAACCATGAACAAATTTGTAATTTCTTTCTTTTACTAACCTATGTTTAC  
ATTCATACCTTTTGTATGTCCACGGTAATGTTTTCTTTGTCTCATCTTCTCCCTGTGGAGACATCTGAAGAATATGCAGC  
ACACCGCCAAAGGATGCAGAGACATCAGCACCACAGTGCATTCAGAGCCCTGCAAACCATCATTGTGTCTGTAGTGCTA

TACACTATTTTTTTCTATCATTTTTTGTAAAGTTTGGAGTTTGTGTACCAGAGAGATACCTGATCTTTTTGTTTGT  
CTGGGCTCTGGGAAATGCTGTTTTTCTGCTCACCATTTTGTCTATGATTTTTGGTAAACAGAAGATTGAGATTGGCTTCTC  
TCTCTCTGATTTTTTGGCTCTGGTACAGGTTTAAAAATATAGAAGTATAG

>Mumu-T2R30p

GTAACAGACTGTGGTATTCTCTTACAGGTTGTGGCTGCTATCATACGGATCATATTTACAACCATTTTCAATTTTGGAAAT  
TCTCTTTGGGAACCTTTTAAATGGATTATAGCACTGGTGAATTTTGTAACTGGGTTTACAGAGAAGAATAATTTCTCCAG  
TGGGTCAAATAACTACTGCCCTTACAATTTCCGACTTGTTCAGCTCTGGCTGTACAAATAAATATATTGCTTTTCTT  
ATTTACCAAGTAAAAATGACAGAAATAGTTGTAAGAGCGATCAATATTGCCTGGGTTGTACCAATCACTTTAATCTTTG  
GATATCTACCAAACTCAGTATGTTTTACCTTCTGAAGATAGTCAATTTTTCGAGTTCAATTTTCTTTACTTAAAAATAGA  
GAGCTAGGCATGTGGTTTCAGTAACCTGATGCTGTCCCTTGCCTTCTTGGTTTTGAACATCATAGTCATCAATACCCAT  
ATTGATGTCTGGATTGAAGTGAATGTAAGAATCATGCTTATAATTTTAGTTCAAGGAACCTACTTTATTTCTCAACA  
TCTTTTATTCACCAACTCTATATTTGCAAGCATCCCTTTGCTGTATCACTGGTAGCTTTTTCTGTTAATTTCTCTCTT  
TGTGGAACATGAAAAGAAGATGCGTAACAATGTTGGGGCTTCCAGAGACTCCAACCCAGGCCACATTAAAGCCTTG  
AAGATAGCCTTGCTTTCTCTCTCTTTATGCCATATTTTACCTTCTCTTGTATAAATGTTTGAGCATCGAATTCAG  
GAGAATTATATGATTTTTTTATTTAGCTATTTACTGGAATAGCTTTTTCTTCATTCCACTCTATATCTGATTCTGGG  
AAACAATAAATTGAAACAGGCTTCTTTCTGTGCTGTGGTGGATGAGGTGCAGGCCAAAGATGTAAGATTCTCTGGTT  
CCTAA

>Mumu-T2R31

ATGATGGGTATTGCCATAGATATCTTATGGGCAGCTATTATCATTGTGCAATTCATAATTGGGAATATTGCAATGGATT  
CATAGCATTGGTGAACATCATAGACTGGGTGAAGAGAAGAAAAATCTCTTTAATGGATAAGATCACTACTGCTTTGGCAA  
TCTCTAGGATTTATCTGCTGTGGTCTACATTTCTAATTACACTAACATCTTCACTGGATCCAGATATTTAAATGGCTGTG  
AAAACTATTAGAATAAGCAATAACACCTGGATTATTGCAAAATCATTTTCAGCATTTGGTTTGTACATGTCTCAGCATCTT  
TTATTTTCTCAAGATAGCCAATTTTTCTAACTATATTTTTCTCTACTTAAAGTGAGATTAAAGAAGGTGGTTTCAGTGA  
CATTGCTAATCTCTCTTATCTTCTGCTTTTAAATATTTTACTGATGAACATGCATATTGATATCTGGAGTGATAAGTCC  
AAAAGAAACCTTTCTTTTAGTGTGAGATCAAATAATTGCACTCAGTTTCCAGACTTGTCTTTTAAATCAACACAATGTT  
CACATCAATCCCTTCACTGTGTCCCTGTTGGCTTTTCTGCTTCTCATCTTCTCCCTGTGGAGACACCTGAAAACCATGC  
AATACTATGTAAAGGCTCCGAAGACACCACACAGCTGCACATATAAAGGCTTGCACATGGTAGTGGCTTTCTCTCTG  
TTCTACACAGTTTTCTTTTGTCTTCTTGGCATAAATATTGGACCTCTGGGTCTCAAGAGAATAACAACCTGTTTTATGC  
CACAATTGTAATTACTTTCCCTTCACTCCATTATGATCTCTGATTCTGAGAAACAGCCAGCTGAGGCAGGCATCTCTGT  
TGGTGCTGTGGTGGCTGTGTGCAAGTCCAAAGATGTACGGATGTTGGTTCCCTGA

>Mumu-T2R32p

AAGAGAAGAAAGCTTTCTCAGTGGATCAGCTGCTCACTGCACTGGCCGTCTCCAGAATCACTTTGCTGTGGTACCTGTA  
CATAATGAAACGAACATTTTTAGTGGATCCAAACATTGGTGCAATTATGCAATCAACAAGACTGACTAATGTTATCTGGA  
TAATTTCTAACCATTTTAGTATATGGCTGGCCACCACCCTCAGCATCTTTATTTTCTCAAGATAGCAAATTTTCTAAC  
TCTATTTTCTGTTACCTGAGGTGGAGATTTGAAAAGGTGATTTTGATGGCATTGCTGGTGTCCCTGGTCTCTTGTAT  
AGATATTTTAGTAACAAACATGTACATTAATATTTGGACTGATGAATTCAAAGGAAATGTATCTGACAGTTACAAATTAA  
AGATTTTTTTATAGGTTTCCAGACTTCTTGTGTTAACAATACTATGTTACATTTGTACCCTTCACTGTATCTATAAT  
AATATTTTTCTGCTTATCTTCTCCCTGTGGAAACATCTGAGGATGGTGAAGCACATTGCCCAAAGCTCCCAAAATGCCA  
GCACCACAGCCACATCAATGCTTTGAGAACTGTAATTGCTTCTCTCTCTTGTATGTCAATTTTATTTTATCCCTCTTT  
GCACATCTTTGGAGCTTTGAGTTTGGAGAAAAGACATATTTTATTTTCTTTTGCCTTGTGGTATTTTGCATTACCATC  
ACTCCATTATGCATCTTGATTCTGGGAAACAGTAAATTGAGGGAGATCTCTTTTTGGTACTGTCACTGTTAAAGTGCA  
ATATACAAGGATGTGAATCCCTGGGTCCCTGGCACACTAGGGAGGATACTTTTGTAATTTTAA

>Mumu-T2R33

ATGGATGGAATCGTACAGAACATGTTTACATTCATTGTAATTGTGGAATAATAATAGGATGGATTGGAATGGATTCAT  
AGCTCTGGTGAACATGCATACACTGGTACAAGAGAAGAAAGATCTCTGCACTGAATCAAATACTCACAGCCTTGGCTTCT  
CCAGAATCTACCTTCTTTTAAACAGTATTCACTGTTATAGCAGTGTCTACGCTATACACACAGTGTGGTAAC TAGAAGA  
GTGGTAAAACGATTAATTTCCATTTGCTTTTCAGCAATCATTTTAGCATGTGGCTTGTGTCATGCCCTTGGCTTTATTA  
TTTTCTTAAAATAGCTCATTTTCTTAACTCTATTTTGTCTTAAAGATGAGAATTAACCAGGTGGTTTCAGGGACTT  
TGCTCATGTCTTTGGCTCTTTGTTTCTAAACACTCTGCTGATAAACTCATACATTGATACCAAGATAGATGACTACAGA  
GAACATCTACTGTATGATTTCACTTCGAATAATACTGCTTCATTTTACAGGGTTATTTTAGTCATTAACAACCTGTATTTT  
CACATCTATACCCTTTACACTTTCCAGTCCACTTTTCTCTGCTCATCTTCTCCCTGTGGAGACATTACAAGAAGATGC  
AACAGCATGCACAAGATGCAGAGATGCTTGCAGATGCCACATCAGAGTCTTGCAAACCATGGTCACCTATGTCCTA  
CTCTGTGCCATTTTCTTTCTGTCTCTTCCATGCAAATTTTGGAGAGTGAGTTGTTGAAGAACATTTCTTACGTTAGGTT  
CTGCGAGATTGTTGAGCAGTTTTTCTTCAAGGACACTCTGTGCTTAATCTGTAGAGACACAAACCTGAGAGGGACCT  
TTCTTTCTGTGCTATCGTGGCTGAAGCAGAGGTTTACATCATGGATTCTAACATAAATTGCAGATCATCTTGCAATTT  
TAA

>Mumu-T2R34

ATGTATATGATACTGGTAAGAGCAGTATTTATAACTGGAATGCTGGGAAATATGTTTCATTGGACTGGCAAACCTGCTGTA  
CTGGGTCAAGAACCAGAAAAACCTTCATCAACTTCATCATGGTCTGTTTGGCAGCTTCCAGAATCAGCTCTGTGCTGA  
TGTTATTTATTGATGCAACCATAACAAGAACTAGCGCTCATTTCTATTATTCTTACCGTCTAGTAAAATGCTCTGATATA  
TTCTGGGTATAACTGATCAACTATCAACATGGCTTGCCACCTGCCTGAGCATATTCTACTATTCAAAGTAGCCACAT  
TTCCCATCCCTTTTCTCTGGTTTAAAGTGAGATTGAGAGGTGTGCTGTTGTTTTCTTGATTTTCTTTGTTCTTAT  
TGATTTCTTATTTTCTACTGCTTGAACACTTCCTATTTGGGGAGATATTTATGTAACCTTAAAAACAATCTGACCTTA  
TTTTCAGGTACAATTAAGACCACTGCTTTTCAAAAGATAATTGTTTTGATATAATATTTAGTCCCATTTCTTGTGTC  
CCTAGCATCATTGCTCCTTTATTTTTGTCTTGGTGAACACTCCCGAAGCCTTGACCTGATTTCTACCACCTTCTGAAG

ATTCCAGAACCAAGATTATAAGAAGGCCATGAAAATGCTGGTGTCTTCTCATTCTCTTTATAATTACATTTTTTTC  
ATGCAGTTAGCACGGTGGTTATTATTTTTGTTTCCAATGAGCAGGCCAATTAAATTCATCTTAACATTAAATATCTTTGC  
CTTAACCTACTCATTTATTCTCATCTGGGAAATAGCAATCTTCGACAGAGAGCAATGAGGATCTGCAACATCTTAAAA  
GCCAGCTTCAAGAGCTGATCCTCTCCCTTCATAGATTCTCCAGTCTTTACTAG

>Mumu-T2R35

ATGGAGCATCTTTTGAAGAGAACATTTGATATCACCGAGAACATACTTCTAATTATTTTATTCATTGAATTAATAATTGG  
ACTTATAGGAAACGGATTACAGCCTTGGTGCATGCGTGGTGAAGAGAAAAAAATGTCATTAGTTAATAAAAA  
TCCTCACCGCTTTGGCAACTTCTAGAATTTTCTGCTCTGGTTCATGCTAGTAGGTTTTCCAATTAGCTCACTGTACCCA  
TATTTAGTTACTACTAGACTGATGATACAGTTCCTAGTACTCTATGGACTATAGCTAACCATATTAGTGTCTGGTTTGC  
TACATGCCTCAGTGTCTTTTATTTCTCAAGATAGCCAATTTTCTAATTCTCCTTTCTCTATCTAAAGAGGAGAGTTG  
AAAAAGTAGTTTCAGTTACATTACTGGTGTCTCTGGTCTCTTGTTTTTAAATATTTTACTACTTAATTTGAAATTAAC  
ATGTGTATAAATGAATATCATCAATAAACATATCATACATCTTCATTTCTTATTACCATTTAAGTTGTCAAATTCAGGT  
GTTAGGAAGTCACATTATTTTCTGTCTGTCCCCGTTGTTTGTCCCTGTCAACTTTTCTCTGCTCATCTTCTCCCTGT  
GGACACTTCAACAAGAGGATGCAGCAGCATGTTCAAGGAGGCAGAGATGCCAGAACCACGGCCCACTTCAAAGCCTTGCAA  
GCAGTGATTGCCTTTCTCTACTATACTCCATTTTATCCTGTCACTGTTACTACAATTTTGGATCCATGGATTAAGGAA  
GAAACCTCCTTTCATTGCATTTTGTCAAGTTGTAGATACAGCTTTTCTTTCATTCCATTATGTCTTGATTCTGAGAG  
ACAGGAAGCTGAGACACGCTCTCTCTGTGTGCTGGCTGAAATGCAGGCCAAATTATGTGAAATAA

>Mumu-T2R36p

ATGGAGCATCCTTTGAGGAGAACATTTGATTTCTCCAGAGCATACTTCTAACCATTTTATTCATTGAATTAATAATTGG  
ACTTATAAGAAATGGATTAATGGTATTGGTGCATGCGTGGTGAAGAGAAAAAAATTTCAATTTGTTAATCAAAAT  
CCTCACCACTTTGGCAACTTCCAGAATTTTGTCTGCTCTGGTTCATGCTAATACATCTCCTGATTACTTTATTTGTATGCA  
GATTTAGCTAGTACTAGAACGATGATGCAATTCGCTAGCAATCCATGGACTATATCTAACCATATCAGCATCTGGCTTGC  
TACATGCCTTGGTGTCTTTTATTTTCTCAAGATAGCCAATTTTCTAACTCTACTTTTCTCTATCTAAAATGGCGAGTTT  
AGTTCCTCTTGTAAATATTTTACTGGTTAAATTTGAGATTAACATGTGGATAAATGAATATCATCAATAAACATACCA  
TACAGCTTCAATTTCTTATTACCAAAATGTCAAATACAGGTGTTAAGTCTTACATTATTTTCTGTCTGTCCCCCTTATT  
TTGTCCCTGTCAACTTTTCTCTGCTCATCTTCTCCCTGTGGACACATCACAAGAGGATGCAGCAGCATGTTCAAGGATA  
CAGAGATGCCAGCACAATGGCCCACTTCAAAGCCTTGCAAGCAGTGATTGCCTTTCTCTTAATACTCACTTCTTTTATCC  
TGCTACTGTTACTACAATTTGGAAACATGAATTAAGGAAGAAACCTCCTTTTGTGTATTTTGTCAAGTTGCATATATA  
GCTTTTCTTTCATCCCATTCATATGTCTTCTGTTGGGAGACAGAAAGCTGAGACAGGCTGTCTCTGTGTTGTGGAG  
GCTGAAATGCAGGCCAAATTATGTGGGATAA

>Mumu-T2R37p

ATGCAGCATCTTTTAAAGACAATATTTGTTATCTGCCATAGCACACTTGCAATCATTTTAAATCTTTGAATTAATAATTGG  
AATTTTAGGAAATGGGTTTCATGGCCCTGGTGCATGCTAGTGGTGAAGAGAAAGAAATGTCCTTAGTTAATAAAAA  
TCCTCACTGCTTTGGCAATCTCCAGAATTTTTCATCTCAGTTTATTGCTTATAAGTTTAGTCATATTCTTTTCATATTCT  
GATATTCCTATGACTTCAAGGATGACACAAGTCAGTAATAATGTTTGGATTATAGTCAATCATTTCAAGTATCTGGCTTTC  
TACATGCCTCAGTGTCTTTTATTTTCTCAAGATATCCAATTTTCTAACTCTTTTTTCTTTATCTAAAGTGGAGAGTTG  
AAAAAGTAGTTTCAGTTACACTGTTGGTGTCTCTCCTGATTTTAAATATTTTATTAATTAACCTTGGAAATTAGC  
ATATGCATAAAGGAATGTCAAAGAAACATATCATGCAGCTTCAGTTCTCATTACTATGCAAAGTGTACAGGCAGGTGTT  
AAGGCTTACATTATTTTCTGTCTGTCCCCGTTGTTTGTCCCTGTCAACTTTTCTCTGCTCATCTTCTCCCTGTGGA  
CACTTCACCAGAGGATGCAGCAGCATGTTCAAGGAGGCAGAGATGCCAGAACCACGGCCCACTTCAAAGCCCTACAAACT  
GTGATTGCATTTTCTCTACTATATTCCATTTTATTCTGTCTGTCTTAATACAAATATGAATTACTGAAGAAAAATCTTT  
TCGTTGTATTTTGTGAGGTTGTATATATAGCTTTTCCGACATTCATTATATATTCTGATTGTAGGAGACATGAAGCTG  
AGACAGGCTGCTGCTCTCTGTATTATCGCAGCTGAAATTCAGACTACACTATGTAGAAATTTAGATCACTAA

>Mumu-T2R38

ATGGTGTTGACAATAAGGGCTATTTTATGGGTAACATTGATAACTATTATAAGTCTGGAGTTTATCATAGGAATTTTAGG  
AAATGTATTATAGCTCTCGTGAACATCATAGACTGGGTTAAAAGAGGAAAGATCTCTGCAGTGGATAAGACCTATATGG  
CCCTGGCCATCTCCAGGACTGCTTTTATTGTCTAATACACAGGTTCTTGGTATCATTATTGGACCCAGCTTTATTG  
GGAATGAGAACGATGGTAAGGCTCCTTACTATTTCTGGATGGTGACCAATCATTTTCAGTGTCTGTTTGAACATGCCT  
CAGTATCTTTTATTTTCTCAAGATAGCTAATTTCTCAAATTCATTTTCTTCTCAATGGGAAGCTAAAAAGTGG  
TATCAGTGACATTGGTGGTATCTGTGATAATCTTGATCATGAACATTATAGTCATAAACAATTCAGTGACAGACTTCAA  
GTAAACACACTCCAGAAGTGTAGTACAAGTAACACTTTAAAAGATTATGGGCTCTTTTATTATTAGCACTGGGTTTAC  
ACTCACCCCATTCGCTGTGTCTTTGACAATGTTTCTTCTGCTCATCTTCTCCCTGTGGAGACATCTGAAGAATATGTGTC  
ACAGTGCCACAGGCTCCAGAGATGTCAGCACAGTGGCCACATAAAAGGCTTGCAAATGTGGTAACCTTCTGTTACTA  
TATACTGCTTTTGTATGTCACCTTCTTTCAGAGTCTTGAATATTAACATTCAACATACAAATCTTCTTCTCATTTTTT  
ACGGAGTATAGGAGTAGCTTTTCCCACAGGCCACTCCTGTGACTGATTCTTGAAACAGTAAGCTGAGGCAAGCCTCTC  
TTTCTGTGATATTGTGGCTGAGGTATAAGTACAAACATATAGAGAATTGGGGCCCTAA

>Mumu-T2R39

ATGAATGCTACTGTGAAGGTACATTATTAATCATCTTAGGTGTAGAAATCATTATAGGGTGTATTAGGAAATGGATTAT  
AGCTGTGGTGAACATTATGGACTGGGCAAGAGAAGAAAGATCTCTAGTGGATCAGATATTCAGTGTCTGGCCATCT  
CCAGACTTGCTTTTGTGTGGTCACTACTCACAGTTTTATTCACATCTGAGCTGTACTCAGCATTAAATGACAACAAGAAAA  
GTGTTGATAAATATTAATAATTCCTGGACAGTGATCAATCATTTCAATATTTGGCTTGCTACATGTCTCAGCATCTTTTA  
TTTTCTCATGATAGCTAATTTTCAAATTCATTTTTCTTCCCTAAGGTGGAGGGTAAAACTGTGGTTTCAGTAACAC  
TATTGATGTCACCTTCTCTCTTGTGTTAAACGTTTTAGTCATAAACACATTTATTGTTATCTCAGTTGATGTATATAA  
GTAATACGTCCTACAGTTCTCATTAGATAACAATATACATATTTCTAGGATTTTTTATTACCAACACTATATTCAC  
ATTCATACCTTCAGTGTGACGCTGACAATTTTTCTCCTGCTCATCTTCTCACTATGGACTCATCTGAAGAACATGCAAC

>Mumu-T2R40p

>Mumu-T2R41

>Cafa-T2R1

>Cafa-T2R2

>Cafq-T2R3

ATGTCAGGGCTGGGGAATCCGTTCTCTGGTTCTGCTGTCACTCAGTTTCATTCTGGGATGCTGGGGAATGGTTTCAT  
AGTGTGGTCAATGGCAGCAGCTGGTTCAAGAACAGACAGTCTCTTTGCTGACGTTATCATCTAACCTGGCTCTCT  
CCAGGATTGTTCTGCTGTGGATTCTCTGGTTGATGGTGTTTAATGGTCTCTTTTCCAAAGTACATGATGAAGGGACA  
GTAATTGAAATTATTGATATTTCTGGACATTTACGAACCACCTGAGCATTTGGCTTGCCACCTGTCTCAGTGTCTCTA  
CTGCCTGAAAATTGCCAGTTTCTCCCATCCGACGTTCTCTGGCTCAAGTGGAGAGTTTCCAGAGTGGTCTGACAGATGA  
TTTGGGTGCACGTCTTATCGTGTGCCAGTGCCATGCTCTGGTCCATGAATTTAAGATCTATTCTATTCTCAGTGA  
ATTTGCTGGTACGGGAATGTGACCGAGCATTTAGAAAGAAAGAAATGACTATAAAGTGCCCATGTTCTGGGACTCT  
GTGGAACCTCCCTCCCTAAATTTGTTTCTCTGGCTCTCTATTTCTGCTCATCTTCTCCCTGGGAAGGCACACAGCAGA

TGAAGCACAGTGGCACCAGCTCCAGAGATCTGAGCACGGAGGCCACCAGAGAGCCATCAAAATCATCGTCTCTTTCTCT  
TTTCTCTTCTGCTTTACTTTCTTGCCTTTTTAATTACATCATCCAGTTATTTTCATACCAGAACTGAGATGGTTAAGAG  
AGTTGGAGTAGTTGTTACAATGTTTTACCCTGCCAGCCACTCATTGTTATCATTCTGGGAAACAATAAGCTGAAGCAGA  
TGTTTACGGAGATGCTGTGCTGTGAGCCTGGTTATCTGAAGCCTGGATTCAAAGACCTTTGCCCATAA

>Cafa-T2R4-partial

ATGTTTTGGACTCTAATAGTCTCTGGTTTGAACCTTGCTCAATGCCTTGACTGCGTGAAGATTACGGACTTCCAACCT  
GGAGTATTTCTCTGCTGAAGCGAAATCTCTCCCAAGATCCCAGGCTGTTGCTAGCCTGTGACTGATTCTGCCTT  
CACCCTCTCCTGTATGTTGTCTCAACAGACATCATCCCTTCTGAATTTGTGACTCAGAGAAATGGTACAGGATGTG  
GCATCCATGGGAGTGTCTTGTCTTTGGTGACCTCTTGGTCTTGCCTCAGTTCTCCAGTTTATCATTAAATGTGACTTCT  
GCTTCCTTGTGATACATTCTTGGAGAGACATATACAGAAGATGCAGAAAAACCACTATTTTTTGAATCCTCAGAC  
TGAAGCTCATGTGGGCGCTATGAAGCTGATGATCTGTTTCTCATCTGTACATTCTTACTCAGTTGCTACCTTGCTAC  
ATTATTTCCCTTATGGTGGGATGGATTTGAGAACCAGATCCATCTGTTTGGTTATTTCCAGCTTTTACCCTCCAGGACAT  
TCTATTCTCATTATCCTCACACATCTAACTGAAAAACAAAGCAAAGAAGATTCTTGTTCACAAATAG

>Cafa-T2R5

ATGCTGACTGCTGCCCTACCACTGCTGATGGTGGTGGCAGTGGTTGAATTTCTATTGGCTTGGTGGGAAATGGAGTCTT  
TATGGTCTGGAGTTTTGGTGAATGGGTGAGAAATCAACGGGTCTCATACAACCTCATTGTCCTGGGCTGGCTGTCT  
GCCGATTTCTCTGCAGTGTCTGATTATGATGGACTTAAGCCTGTTTCCATTTTCCAGAGTAGCCGTTGGCTTCACTAT  
CTCAGTATCTTCTGGATCTGGTAAGCCAGGCCAGCCTGTGGTTTGCCTTTCTCAGCGTCTTCTACTGCAGGAAGAT  
CATGACCTTGAACATCTGTCTGCTTGTGGCTGAAGCAGAGGGCCTATTGCCTGAGTCTCTGGTGCCTTCTGGTGTACC  
TCATGATCAGTTTGTACTTGTAGCACACATTGGCTTAAAGCCTATAATCCTTCTCAAGGCAACAGCAGCATTCTGTAC  
CCCCTTAAAGCTGGCACTACCTGTATATAGTAAAGCTCAACGCAGGAAGTGGATTGCCTCTCATGGTGTCTTCTGTTT  
TTCTGGGATGCTGATTGTCTCTTGTATAGACACCACAAGAAGATGGAGGTACATACAGCTGGTAGGAGAGATGCTCAGG  
CCAAGGCTCACATCACTGACTGTAAGTCCCTTGGGCTGCTTCCCTTATCCTTCTCATGTGATTTATATCCTGCCAGCCCTTT  
TCCATTACCTCCAAGTCTTCTGCTGATCTCTCTGTTGTCTTCTCTGAGACAGTATGGCTGCCTATCCTTCTCTTCA  
TTCTGTCTATTCTGATCCTGGGAATCCAGGATGAAGCAGACTTGTGAGAGAATTCTGTGAAGACAGTGTGTCTTGGG  
AATCCTAG

>Cafa-T2R7

ATGCCGGATAAAGTGGAGAGCATCTTAATGCTCGTAGCAGCTGGAGAATTTTCAATGGGGATTTTAGGGAATACATTCAT  
TGGATTGGTAAACTGCATAGGCTGGATCAAGAAGAGGAAGATTGCCCTCATTGATTTAATCCTCACAAGTCTGGCCATAT  
CCAGAATTTGCTATTATGTATAATACTATTAGATTGTTTTATATTGGTGTGTATCCAGATGTCTATGCTACCGGTA  
CAAAATGAGAATAATTGACTTCTTCTGGACACTAACCAACATTAAAGTGTCTGGTTTGGCCACTGTCTCAGCATTTTCTA  
TTTCTCAAGATTGCGAATTTCTTCCATCCCTTTTCTCTGGATGAAGTGGAGAATTGACAGTGCGATTCTAGGATCC  
TGCTGGGATGCTTGGCCCTTCTGTGTTTATTAGCCTTGTGTCACTGAGAATTTGAATGATGATTTCAGATGTTGTGT  
AGGACAAAGAAGAAAAACAACTTAAGTGTGAGATGCAGAGTAAAGAAAGCTAAATATTCTCCATCAAGATTTGCCTCAA  
CCTGTTAACGCTATTTCCCTTTTCTGTGTCCCTGATCTCATTTCTCCTCTTGATCCTCTCCCTCTGGAGACATACCAGGC  
AGATGAAGTTCAATGCCACAGGGTGTAGAGACTTCAGCATAGAAGCCACATGGGAGCCATGAAAGCTGTCTATCTCCTTT  
CTCCTCTTTTCTATCGCCTACTATTTGGCCTTTCTTGTAGCCACCTCTAGCTACTTTATGCCAGAGACTGAATTAGCTGT  
GATCATTGGTGAGTTGATAGCTCTAATCTATCCCTCGAGCCATTGTTTATCCTAATTTCTGGGAGCAATAAATTAAGAC  
AGGCATCTCTAAGGTAATGAAAAGTAAATATGTCTTAAAAAGAAGAACTTCTAA

>Cafa-T2R8p

ATGCTCAGTATGGAAGACATCATCTTCATGATCGTAATAACTGGAGAATTCATAATAGGAATGTTGGGAATGCATGCAT  
TGGACTAGTAAACTCTATTGACTGGATTAAGAAGAAAAAGATCTCTCAATTGACTATATCCTCACCAGTCTAGCCAAAA  
TTGGTTTGTCTGTATAATGATACTAAATGGCACCAAAATCGTATTCTGCCAGATTTTATAAAAGGATAAGCTACAA  
GCAGTCATTAATATCTTCTGGATACTCACCAACTACTTAAGTATGTGGTTTACCACCTGCCTTAATGTCTTCTATTACT  
CAAGATAGCCAATTTCTCCACCCACCTTTTCTCTGGCTAAAGAGGAGAACTGACAGAGTGATTCACTGGATTCTGCTG  
GGTGTGTTGGCTCTTCTTCTTAATCAGCCTTATACTAGCAATGACACCAAAATGATTGTGAGTTTTGTAACATTGC  
AAAACATAAAGGAACTGAATGAAATGCTCTCTGAAGTAAAGTCAATACTTCAAGCCATTGACTCTCTTAACTTGT  
TGGCAATTTGCCATGCTGTTGCTCTGACACTTGGTCTCATTTTCTTCTTAAATTATGTCCTATGGAGACATCAAGCAAATG  
AAACTCAACGTTATAGGCTGTGGAGACCTCAGCACAGAGCGGGAGCCATGAAAAGTGTGACTTCATTTCTTCTCTCT  
TTTTGTGACTATGGGCTTCTCTTTTGGTAACCTTTAGCTACCTTATGAAAGAAAGCAAGTTAGCTGTGATGTTGAAG  
AAATTATAGCAACACTCTATCCTTCTGGTCATTCACTTATTTTGGTTATTGGAAATAACAAGCTGAGGCAGGCATTTATC  
AGGATGCTGAGATACGGAAGAACAGTCTGCATGATGTAA

>Cafa-T2R9p

ATGCTAAGTACAATGGAGGTAATATACATCTTCTTGATTGCCGGAGAAATGACTATAGGAATTTGGGGAATGGATTAT  
TGCACTGGTTAACTGCACTAGGTGGCTCAGAAGGAGAGACATCTCCGTGATTGACATCATCTGGTGATCTTGGCCATCT  
CCAGAATCTGTTTGTGTGTGGTATCTTTAGATGGCTTTATTTTGTCTCTCTCCAGATATATATGCCAAATAGCGAG  
CTAATGAATATTGGGATGTTGTCTGGACACTTAGCAATCATTCAAGTATCTGTTTTACTTCTTCCCTCAGTATTTTCTA  
TTTACTGAAGATAGCCAATATATCCCATCCGTTTTTCTCTGGCTGAAGCTAAAGATTAACAGAGTCATTCTGGGATGT  
TTCTGATGTCTTTTCTTACCTGTATAATTATTAGTGTTCATTGAATGAGGACTTCTGGGATCCCTTCAAAGTCAATCAT  
AAGGAAAACATAACTTGGGAATCCAAAGTGAAGTAAATCCCAAGTGCTTTCAAAGTGTATCCTGAATCTGGGAGCTAT  
AGTTCCTTTTGTCTTTGCTTAACTCTCAGTCTCTTGTACTTTTCTCCCTATTTAGACACACTAGGCAGATGAACTTT  
ATGCCACAGGGTCCAGAGACCCAGCACAGAGGCCACATGAGGGCCATAAAGGCAGTGATGATCTTTCTGCTCCTCTTC  
ATTATTTACTATGCACTCTCTTGTAGTAACCTCTAGCTTCTGATTCTCACGGAAAATTAGTGGTTATGTTTGGTGG  
CGTGGTAGTTGGCATTTCCTATCGAGCCATCGTTCATACTGATAATGGGCAACAGCAAGCTGAGGGGGGCTTCTCTAAA  
AGTGCTTAGGATTGTGAAGGGTTTCCACAAAAGAAGGAAACCTTTGTTCCATAG

>Cafa-T2R10

ATGCTAAGCATACTGGAAGGCCTCCTCATTTTTATAGCTGTTAGTGAATCAATACTGGGAGTTTTAGGGAATGGATTTAT  
TGGACTTGTC AATTGTATTGACTGTGTGAAGAACAAAAAGTTTTCTATGGTTGGCTTTATTCTCACTGGCTTAGCTACTT  
CCAGAATTTGCTGATATTGATAATAATTACAGATGGATTTATAAGATATTCTCTCCAGATATGATTCTCTGGTAAC  
TTAATTGATTATATTAGTTACCTATGGGTAATTATCAATCAATCAAGTATCTGGTTTGGCACCAGCCTCAGCATCTTCTA  
TTTCTGAAGATAGCAAAATTTTCCACCACATTTTCTCTGGCTGAAGGGTGAATCAATAGCGTTCTTCCCTTCTGA  
TGGGATCCTTGTTTATTTTCATGGTTATTTACTTTTCCACAAATTGTGAAGATTATTAATGATAATAGAATGAAGAGTAGA  
AATAACAACCTGGCAGCTCAACATGCAGAAAAGTGAATCTTTACTAAGCAGATTTTACTCAACCTAGGAGTCATTCTTCT  
CTTTACTCTATGCCTGATTACATGTTTCTTGCTAATCGTTTCCCTTTGGAGACACAACAGGCACATGCAATTGAATGTCA  
CTGGACTCCGAGACCCAGTACAGAAGCACATGTGAAAGCAATGAAAATTTTGGTATCTTTTATCATCCTCTTTATCTTG  
TATTTTATAGGCATTGCCATAGAAATATCATGTTTCATTCTGCCAGAAAACAACTGCTGTTTATTTTGGTATGATGAC  
CACAGCCATCTATCCCTGGGGTCATTCAATTATCTAATTCTAGGAAACAGCAAGCTAAAGCAAGCTTCTTTGAAGACCC  
TGCAGCAACTCAAGTGCAGGGCAAGGAGACTGCTCACAGCTGCACAGATCCATGTGGGGGAAATGGATGTTCCAGGAGA  
ATAATCTAG

>Cafa-T2R12

ATGGCAGGCACAATGAAGAATGTATTTATGATGATTTTTGCCGGAGAATTCATAATAGGGATTTTGGGAAATGGATTCAT  
TATATTGGTTAACTGTATCGATTGGATCAGGAGCTGGAAGTCTTCTGATTGACTTTATTCTTACCTGCTTAGCCATTT  
CCAGGATATTTCTGCTGTGCATAATAATGTTAGGCATAGGTCTAGATATAATTTGAAGGAAATATGGTACAATGATAAT  
CAACTGATAACCTTTGAAGTCTCTGACAGGATGCAATTTATTTCTGCACAATCTGTAAGTGTGCTCAGTGTCTTCTA  
CTTCTCAAGATAGCCAACCTCTTCCAATCCATTTTCTTCTGGCTAAAACGGAGAATTCACAGACTGCTTCTCATTATTG  
TCCTGGGAGCAGTCTTCTATTCTGCTTGTCCCTGCTTTGAAGGATATAGTATTTAAGAACATGATCAAAACCAAGGTA  
AACACTGAAAGCAATGTGACATTAATTTACAGCGAGAAAATATGATTACTAATCTTCTAATATATTCTGAACATGCT  
ATTCTGTCATCCCTTTTGCAGTGTCTCTGGCTTCTTTGTCCTTTTGATCCATTCTTATGGAACCATACCAAGCGGATGA  
AGGGCATTGATTCTGGGATCTTATCACAGAGGCCCATGTAAGAGCCATGAAGTTTATGATTTCATTCTGCTATTCTTC  
TTTATATACTATTGAGCAATATTATAATATATTTTGCCTATGTTGTTCTGGATAGTCTGGTGGCAAAATTTTGTCTAA  
TATATTAGTATTTTCTATCTTCTGGCCATCCATTTCTCTGATTTTATGGAAGTCAAAATGAAACAGGCTTCTCTCT  
ATGTCCTGAGGAAGCTGAAGTGGTGCATGAATCTAAGGAAACCCGCATACATAAAGCATACCTGA

>Cafa-T2R38

ATGTTCTTTTCAGTACTGGAGCTCGCAGTGGGGATCCTGACCAATGCCTTCATTTTCTTGGTGAATTTTGGGATGTGGT  
GAGGAGGCAGCCACTGAGCAACTGCGATCTTATCCTTCTGAGTCTCAGCCTCACTCGACTTTTCTGCATGGGCTGCTGT  
TTCTGGATGCCATCCAGCTTACATACTTCCAGCGGATGAAAGACCCACTGAGCCTCAGTACCAGACCATCATCATCTC  
TGGATGATCAAAACCAAGCTGGGCTCTGGCTCACCACCTGTCTCAGTCTTTTCTACTGCTCAAGATTGTCCGTTTCTC  
TCATACCCTCCTTCTGCTTGGCAAACTGGGTCTCCAGGAAGGCACCCAGATGCTCCTGGGTGCCATGCTTTTCTCTT  
CTGCCTGCACTCTCTCTGTTTGGGGGACTTCTTAGTAGACTGGCTTTCATTACAACTGTGCTACTCATGAATAAT  
ACAGAATTTAATTCACAAATTGAAAACCTCAATTTCTATTATCTCTCATCTTCTGTACCCTGGGGTCAATCCCTCCTTT  
CATGTTTTTCTGGTTTCTTCTGGGGTGTCTGATTATCTCTCTGGGAAGGCACATGAGAACCAATGAAGGCCAACACCAAAG  
ACTCCGGTGACCCAGCCTGGAGGCCATATCAAAGCACTCATATCTCTCATCTCTTCTCTGCTCTATGTGGTGTCA  
TTCTGTGTTGCCCTATCTCAGTGCCTTTAACCATGGTGTGGCACAACAAGATCGGGGAATGATCTGTGTAGGGATCCT  
AGCAGCTTGTCCCTCTATACATGCAGCCATCCTGATCTCAGGCAATGCCAAGCTGAGGAGAGCTGTGGAGACCATCTAC  
TCTGGGTTACAGACGCCCTAAGGTAAGGGCAGGCCACAGGGCAGATCTCAGGACTCCAGATCTATGTTGA

>Cafa-T2R39

ATGGAAACCTGCAATCCCCAGAAAATGAATTGTACCATTGGCATCTCTCGATTTTAAACAATTACAGGCACTGAATG  
CATCGTTGGTATCATTGCAAAATGGGTTTCATCATGGCTATAAATGCGGCTGAATGGATTAAAAATAAGACAGTTTCACAA  
GTGGCAGAGTCTGTTTTTCTTGAGTGCATCCAGAATAGCTCTCCAAAGCTTCACAATGCTAGAAATTACCTTCAGTTCA  
ACATCCCCACGTTTTTATAATGAAGATGTTATGTATGACACATTCAAAGTAAGTTTCATGTTCTTAAATCATTGTAGCCT  
CTGGTTTGTCTGCTTGGCTCAGTTTCTTCTACTTCGTGAAGATTGCTGATTTCTCCACCCCTTTTTCTCAAGCTGAAGT  
GGAGAATTTCCAGACTGATGCCCTGGCTTCTGTGGCTTTCAGTGCTTATTTCTTGGGTACAGTATGCTCCTCTCCAAT  
GACATCTACACTGTGATTGTAAACAATTTCTATCCCTCTTCCAACTCCACTAAGAAAAAATACTTCACTAAGACCAA  
TGTGGTCAACCTGTTTCTTCTATACCTGGGATCTTCATTCTCTAATCATGTTTCATCTTTTGGGCCACCTGCTGA  
TCATCTCTCAAGAGACATACTACATGGAAGCAATGCCACTGGCTGCAGGGACCCAGCATGGAGGCTCACATA  
GGGGCCATCAGAGCGACCACTACTTCTCATTCTCTATATTTTCAATTGCTTCTATTTCTCTATATGTCCAACAT  
CTTTGATATCAACAGCTCCTGGAATATTTTGTGCAATTCATCATGGCTGCCTACCTGCTGGTCACTCCATTCTGCTGA  
TTCAGGACAACCTGGGTTGAGAAGAGCCTGGAAGCGGCTTCAGCCTCAAGTTCATTTTTACCTAAAAGAGCAGACTCCA  
TGA

>Cafa-T2R40

ATGTCAGGTTTAAATCGTCCTCACCTTGGTGGTCCCCGGAATAGAGTGCCTCACTGGCATCGTTGGGAATGGCTTCAT  
CACAATCATCCATGGGGCCAAGTGGGCCAGAGGCAAAAGGCTCCCGGTCACTGACTGCATTCTGCTGATGCTCAGCTTTT  
CCAGGCTCTTACTGCAGATCTGGATGATGCTGGAGAATATTACAGTCTACTATTCCGGGTCACTTACAACCAAGACACA  
GTGTTTATAGTCTTCAAAGTCACTGTCAATTTCTGAACTATTTCAACCTCTGGCTTGTGCTGGCTCAACATCTTCTA  
TTGTCTGAGAATCACAACCTTGGCTACCATGTGTTCTTCATGATGAAGAGGAAAATCACGGAGCTGATGCCTCGGCTTC  
TGGGACTGTCACTGTTCACTCTCTTATGCTTCAGCTTCTCTTCTCTACAGATATCTCCATGTGTACGTAACAGTTCC  
ATCCCTATCCGTTCTCCAATACCACCGAGAAGAAGTACTTCTCTGAGACCAATGTGGTCAACCTGGTTCTTCTCTATAA  
CCTGGGGATCTTCATTCTCTGATCATGTTTCATCTTCTCGGCCACCTGCTGATCATCTCTCTCAAGAGACACACACTAC  
ACATGGAAGCAATGCCACTGGCTGCAGGACCCAGCATGGAGGCTCACTTTGGGGCCATCAGAGCGACCACTACTTT  
CTCATTCTCTACATTTTCAATGCAGTTGCTCTATTTCTTCCATGTCCAACATCTTCGACATCAACAGCTCCTGGAATAT

TTTGTGCAAAATTGTCATGGCCGCTACCCAGCTAGCCACTCAGTGCTACTGATCTTGGGTAACCCTGGGCTGAGAAGAG  
CCTGGAAGAGGTTTCAGCACCATGTTCTCTTCACTGTAA

>Cafa-T2R41

ATGCAGCCCCCGTGTCCGCTTCTTTCATGCTGCTCTTTGCTGCTGTGTCTGGGGATCCTGGCCAACGGCTTCAT  
CGTGCTGGTGCTGAGCAGGGAGAGGATGCGCGGGGGAGGCTGCTCCCTCCGACGTGATCCTCCTTAGCCTGGGCGCT  
CCCGCTTCTGCCTGCATGTCATTGGGATGATGAACAACCTTTACTACTACCTCCACCTGGAGGATACAGCACGGGCCG  
GCTCGGAATTCTTTGGCTCCACTGGGACTTCTGAACTCGGCCACCTTCTGGTTCGGCTCTTGGCTCAGCGTCTCTT  
CTGCATGAAGATCGCCAGCTTCAACCCACCCACCTTCTCTGGCTGAGGTGGCGGCTCCAGGCTCGGTGCCCTGGCTC  
TCGGGGCTTCCCTCTGATCTCCTTCTCTGTCACCTGCTCTTCTTTGGGAAACCATGCCGTGTATCAAGGATTCTTA  
ATCAGAAAATACCCCGGGAACATGACCTTCCAGCAGTGGAGCAGGAGGCTGGAATTCATATTTCTTCCCCGTAAATT  
CATCACCTTGTGCTGCTTGTCTGCTTCTGCTGTCATCGCACTGTTGATTAATCCCTGAGGCGACACAGGGGGA  
GGATGCGGCGCAGTGGCCACGGCTGCAGGACCCAGCAGGCTCACACCAGGGCTCTGAAGTCCCTCGTCTCCTTC  
CTCATTCTGTATGCTCTGCTTTCCTGGTCCATCGATGCTGCGGGTTTCTTCTGCTCGCAGAGTGAAGTGGTACTG  
GCCCTGGCAGATTTTAACTACCTGTGCACCTCTGTCCATCCCTATATCCTCATCCTCAGCAACCTCCGGCTCCGAGGGG  
GGTGCAGGCAGCTACTTCTGTTGGTCAAGGGCTCCAGCTGGCCTAG

>Cafa-T2R43

ATGCTACCTTTACTACAGAGCATTTTTTCCATCCTAGTAATGACAGAATTTGTTCTAGGAAATTTGCCAATGGCTTCAT  
AGTGCTGGTGAACACTACATTGCATGGGTCAAGAGACAAAAGATCTCCTCAGCTGATCAAAATCTCACTGGTCTGGCTGTCT  
CCAGAATTGGTTTACTCTGGGTAATATTAATAAATTGGTATGCAACTCTGTTGAATCCAGCTTTATATAGCTTAGAAGTA  
AGGCTTCTTGTTCATATTGCCTGGACAGCGAACAATCATTTTAGCATCTGGCTTGTACTAGCCTCAGTGATTTTATTT  
GTTCAAAATAGCCAATTTCTCTAACCTTATTTTTCTTCGCTAAAGTGGAGAGTTAAAGTGATTTTTGTGATGCTGT  
TGGGGTCTTTGTTCTTTTGGTTTTTCATGTTGCAGTGGTAAGCATATATGAGCAATGCAGATGAAGGAATATGAAGGA  
AACATCACTAGGCAGACCAAACTGAGGGACATTGCACAGCTTATGAATATGACTGATTACGCTAATGAACCTTTGTACC  
CTTTGCTATATCCCTAACATCTTTTCTGCTGTTAATCTTTTCTGTGGAACATCTCAAGAAGATGCGATCCGGTGGTA  
AAAGATATCAAGATTCCAGCACCAAGGTCCACATAAAAGCCATGCAGACTGTGATCTTTTTCTTTGTTATTAGTTTGT  
TACTTCTGACTTTAATTGCCATAGTTTGGAGTTCTAATAGGCTGCAGAACAAGTTGATCTTCTGCTTTGCAAGGCTAT  
TGGAATCCTGTATCTTCAAGCCACTCATTTATCCTGATTTGGGAAACAAGAAGCTCAGAGAGGACTTCTGTCTATTTT  
TGTGGCAGCTGAAGGGCTGGCTGAAAAAAGGATATAAGAGGAGCATCATGTCTTCTAGGAGAAAACAAATTGATGGAG  
TCTGTAATATTTTTTCTTCTACTTCTTTTCTAATGAGTATGTAATTGAGCAATTTCCAAGATTTACCTAAAAAAGTC  
TTTTCTCTGA

>Cafa-T2R44p

ATGCTACCTTTACTACAGAGCATTTTTTCCATCCTAGTAATGACAGAATTTGTTCTAGGAAATTTGCCAATGGCTTCAT  
AGTGCTGGTGAACACTACATTGCGTGGGTCAAGAGACAAAAGATCTCCTCAGCTGATCAAAATCTCACTGGTCTGGCTGTCT  
CCAGAATTGGTTTACTCTGGGTAATATTAATAAATTGGTATGCAACTCTGTTGAATCCAGCTTTATATAGCTTAGAAGTA  
AGGCTTCTGTTTCATATTGCCTGGACAGCGAGCAATCATTTTAGCATCTGGCTTGTACTAGCCTCAGTGATTTTATTT  
GTTCAAAATAGCCAATTTCTCTAACCTTATTTTTCTTCGCTAAAGTGGAGAGTTAAAGTGATTTTTGTGATGCTGT  
TGGGGTCTTTGTTCTTTTAGTTTTTCATGTTGCAATGGTAAGCGTATATGAGCAATGCAGATGAAGGAATATGAAGG  
AAACATCACTAGGCAGACCAAACTGAGGGACATTGCACAGCTTATGAATATGACTGATTACGCTAATGAACCTTTGTAC  
CCTTTGCTATATCCTTAACATCTTTTCTGCTGTTAATCTTTTCCCTGTGGAACATCTCAAGAAGATGCGATCCAGTGGT  
AAAAGATCCCAAGTTCCAGCACCAAGGTCCACATAAAGAGCGCAGACTGTGATCTCTTTTCTTTCTGTTATTAGTTTGT  
ATTCTGACTTTAATTGCCATAGTTTGGAGTTCTAATAGGCTGCAGAATGGACTATTCTTCATGCTTTGCCAAGTTTTTG  
CATATGCATATCCTTCAAGCCACTCATTTATCCTGATTTGGGAAACAAGAAGCTAAGAGAAGCCTTCTGTCTGTTTTA  
TACCAGGTGAAGTACTGGTTGAAAGACCAAAAACCTCAACTCAATAA

>Cafa-T2R55

ATGTTAGCTGGATTGGATATAATCTTTCTTACACTGTCAACAGCAGAATTCATAATTGGAATGTTGGGGAATGCGTTCAT  
TGGACTGGTAAACTGCTCTGAATGGGTCAAGAACCGGAAAACTCTTTAGCTGACTTCATTCTCATCTGCTTGGCTATCT  
CCAGAATCGCTCAGCTGTTGGTGTATGTTTGAATCATTTATGATGGGACTATCTCCACTTTTCTTTTCCACTTATAAA  
CTGGCAAAATCTATTACTTTGCTTTGGAGAATACTCATATTTGGCTACGTGGTTAGTACCTGCCTAAGCATTTTCTA  
CCTCCTTAAGATAGCTCAGTTCTCTCATTTCCCTTTCTCTGGCTGAGGTGGAGAATGAACAGAGTGGTTCTTGCAATTC  
TTGATTTTTCTTTGTTCTTTCTACTGTTTGACTTTCTAATGCTAGAAACATTCAATGATCTCTTCTCGAATGTCGATGCA  
ATGGATGAAAGTAATCTGACTTTATATATATATGAAAGTAAACTTTTTATGTTAAACCTTGATTCTTCTTAGTTTTTC  
CTATATCATTCCTATTATTCTGTCCCTGACCTCATTGCTCCTTTATTTCTGTCTTGGTAAACACATCAGAAATTTGC  
AGCTCAACTCCATGGGCTCCAGGGATTCCAGCACACAGGCCATAAAAAAGCCATTAATGATGTTCTTCTCTCTTC  
CTTTTACAGTTCACCTTTTTTCCATACAATTGTCAAAATGGATGTTTTTTTTATTTTGGAAACAAGAAGATCACAAAGTT  
TATCATGTTGGCGTTTATGTCTTCTTCAAGCCACTCACTAATTTGATTCTGGGAAACAGCAAGCTGAGACAGACAG  
CCTTGAAGGTACTGTGCATCTTAAAGCTCCCTGAAAAGAGAAAAACCAATTCATCTTTACCGATAGACTTTCCAGAA  
TCTTTCCAATGA

>Cafa-T2R62p-partial

ATGCTCTCTCACCTACATTGATCTTCATGGTCATCTTCTCTGGAGTCGTTGGCTGCAATGCTGCAGAATGGCTTCAT  
GGTACTGTGTTGGGCAGGGAGTGGGTGCGACGCGGACGCTGCTGCAGGTGACATGATTGGGCTCCCTGGCTGCCT  
CCTGGTCTGCCTGCATGGGGTGGCCATCCTGAACAACCTCTTGATCTTCTTGGTTTTCACTTCGTAAGGGATTATTAC  
AACACCTCTGGCACTTTGTCAACACTCTCACTCTCTGGCTCACTGCTGGCTTGTGTCTTCTACTGTGTGAAGGTCGC  
CGTCTTCTCTACCCGGTCTTCTTCTGGCTGAAATGGAGGATTTCTCGGTTAGTGCCAGGCTGCTGCTGGGCTCCCTGG  
TCTTAGTTGGCCTGACAGTCATCTCATCAGCCATTGTGACTGGAATTTCTGAAACAGATGATTGCCTCCAAGAGTTCCCAA  
GGAACAGCACCTGGGCTGAGAGAGTACAGGCCCTCTATAGGTCTTTTCAAATATTTGATGTAATGCTTATGTGGTCAGT

TCCATTCTCATGGCTTGTGCCATGCTCTGCTGG

>Cafa-T2R67

ATGCCATCTAGAATTGAAATGCTTTTCTGGTAGCAGCAGCAGGAGAACTCATAACTGGAATGTTGGGGAACGGTTTCAT  
TGTA TAGTTAACTGCATTGACTTGGTGAAGAATCTAAAGCTCTCTACTGCTGACTGCATCCTCACCAGCCTGGCTCTTT  
CCAGAATCATTCTTTGTATAATACTACTTGATTCACTTTTAATGGTGTTTTGGCAACATCTTATGCCATTGATAAG  
CTAGCAAAATTCATTAGTGTTTTTTGGACACTAAGCAATCACCTAACTACCTGGATTGTTACCTGTCTAAATGTTTTCTA  
CTTCTTTAAATAGCCAATTTTTCCACCCCTGTTTCACTGGCTGAGGTGGAGAATTAGCAGAGTGCTACTGTGCTTC  
CACTGGGGTCTTTATTCTACTGTTTTTCACTTTGAATTATTAGATACATTTACGAATTTCTGGGTTAATCTCTATCAA  
AGACATGAAAGAACTCAATTTGGTCCCTAGATGTAAGTAAACTCTGTATCTTAACAGCTTGATTGTTTTCAGTTTCAT  
CTACTTAATCCCCTTTCTCTGTCCCTGGCCTCTTTGCTCCTTTATTTCTTTCTTAATGAGACATATCAGGAATGTGC  
AACGGAATCCAGCTCTAGGACTTCAGAACAGAGGCCCATAAAGGGCCATGAAATGGTGATGTCTTCTCTTTTTCTT  
TCCATGGTTAATTTTACTTCCATCCTATTAACAGGATGGTTTTCCCTTTTACTGCAGAATCATCAGGCCAATTTGGCTGT  
CCTGTTATTATCGACTCTGTACCCTCAGGCCACTCATTTATTTCTAATTTTGGGAAACAACAGTTGAGACAAGCTGCGT  
TAGGTCTACTGTGGCATCTAATTGCCACCTGAAATGGTGAAGCCTTTCGCTTCTTAG

>Bota-T2R1

ATGCTGGAGTCTCACCTTGTTAGCCACCTTGTTTTGGCAGTGGTACACCTTCTCTTGGGATTTTAGTAAATGGCATCAT  
TGTGATTGTGAACGGTACTGACTTCATCAAGCAGAGAAAGTTGATCCGCTGGATCTCTTGTTCCTGCTTGGCGATT  
CCAGGATGGGAATTCAGCTGGCCTTCTCTACACTAACCTGGCTCTTCTTCTTGATCAAATCCCTCAATTTACTGAG  
ACGCTTGTAGTTTTACATTTGTAAATGATTGGGACTTTGGTTTGGCACCTGGCTCAGTGTCTACTACTGCACCAAGAT  
TGCTACCATCGCTCACCCGCTCTCGTTCTGGTTGAAGATGAAGATCTCCAAGTTGGTTCTTGGCTGATTCTTGTGTCCC  
TGCTGTATGCATGTAGTACTTCTGCTATGCATGTCAAATATAAGTGGGTATTTATGGAGAAGACTTCTGGGCCCTTTT  
TTCCCAAATGTAAACACTCACATCAAAGTAACCCCTACCTTACAGTTTGCCTTTCTGTTTGTGAGTTTGCATTGCCATT  
GTTTCATCTTCTGATTTCTCTGCTGCTTGTATTTTCTTGGGAAGACATGCCTGGCAGGTGAGAAACACATGGACAG  
GCCCCAGAAACCCTCACACAGTGGTACATCAGGGCCTTTCTCCATCCTGTCTTCTTGGCCCTCTATCTCTGCCAC  
TACCTGATCATTGCTTTGATCTTTTTCAAATTTTTAACCTCAGAAGCTTTCTATTTCTGTTCTGCACCTTCGTGGTTGG  
TTCATACCACTCCGTCCACTCTATTACTTTAATTTTAGGAAACCCGAAAATGAAACAAAATGCAAAGGCATTGCTCCTCC  
TCAGAAAGTGA

>Bota-T2R2p

ATGATCTCTTTGTGAGGATTCTCATGTTATCATCATGTGACGAGAATTTATCACAGGGGTACAGTAAATGGATTCT  
TATAATCATCAACAGCAATGAATTTGGTCAAAAGCAGAAAGCTAACACCAATGCAACTCTGTTCTGATGTATAGGGATAT  
CTAGATTTGGTCTACAGATGGTGAATGGTACAAGGTTTTTCTCAGTGTTCTTTCCACTCTTTTATAGCGCAAAAAT  
TATGGTACACCAATGCTGTTTTTTGGATGTTTTTCACTCTGTGCTGCTGGTTTGGCACCTGTCTCTTTATTTTA  
CTGCCTCAAGGTTACAGGCTTTACCCAGTCTGTTTTCTTGGCTGAAAGTCAGGATCTCATAGTTAATGCCTTGGATGC  
TTCTGGGAAGCTGCTGACCTCTGTGAGCATTGCAGCTCTGTGTGCAAGGTGGATTACCCTAAAATTTGGGATATTGAT  
ATCCTCGGGAATGCCACAGCTAAGAGGACTAAACTCAACACAAAGCAAATTAATGAAGTTCTTCTCATCAACTTGGCATT  
AATATTTCTCTGACTATATTATAATATGCACTGTTATATTATTAATTTCTCTCTACAAGCACACTCATCGGATGCAAA  
ATGGACCTCTTGGTTTTAGAAACACCAGGACTGAAGCCCATATTAATGCATTAAGAACAGTGATAACATTCTTTTGCTTC  
TTTATTTCTTACTTTGGTGCCTTCATGGCAAATATGACATTCAATATTCCTTATGGAAGTCATTGCTTCTTTGTGGTAAA  
GGATATTATGGCAGCATATCCCTCTGGTCATTGAGTTATAATGATTTGGAGTAATTTAAGTTCCAGCAACCAATCAGGA  
GACTTCTCTGCCTAAGAAGGAGTCAATGA

>Bota-T2R3

ATGTTGAGACTCAGCAATATGGGTTTTCTGGTTCTGACCGCCATTCACTTCATCCTGGGAATGCTGGGAATGGTTTCAT  
AGGGTGGGTCAATGGCAGCAGCTGGTTCAAGAGCAAGAGGATCTCTTTCATGACTTCGTTATCACTAACCTGGCTGTCT  
CCAGGATTGTTTTGCTGTGGATTCTCTTGATCGATGGTATTTTACTGGTGTTCTTTCCAAACTACATGATGAAGGGATA  
ATCATGCAAATTATTGATGTTTTCTGGACATTTACAAACCATCTGAACATTTGGCTTACCACCTGTCTCAGTGTCTTCTA  
CTGCCTGAAAGTGGCCAGTTTCTCCATCCTATGTTCTCTGGCTCAAATGGAGAGTTTCCAGGGTGGTTGTATGGATGC  
TGTTGAGTACCCTGCTGTTATCATGTTGCAGTGCCATCTCTGATCCGGGAATTTAAGATCTATTCTGTTCTTGGTGGGA  
ATTGATAGAACCAGGGAATATGACTGAACTTTTAGAAAGAAAGAAAAGAAATATAAACTGATCCATGTTCTTGGGACTCT  
GTGGGACCTCCCTCCCTAGTCAATATCGCTAATCTCCTACTTTCTGCTTATCCTCTCCCTGGGAGGCATATGCGGCAGA  
TGCATCAAGACTGTGCCAGCTCCAGAGATCTCAGTACCGAGGCCACAGGAGGGCCATCAGAGTCATCCTCTCCTCTCTC  
TTTCTCTTCTACTCTACTATCTTTCTTTTATGTTTTAACATCCAGTTATTTCTTACCAGCACTAAGATGATTGCAAA  
GATTGGAGAAGTAATTGCAATGTTATATCTTGTGCTGGCCACTCCTATGTTCTATTCTGGGAAATAGTAAGCTGAAGCAGA  
TGTTTGTGGCGATGCTACGGTGTGAGCTGGTTGTCTGAAGCCTGGATCCAAGGATCTGTTTATCCATAG

>Bota-T2R4

ATGCTTCGGATAGCTTTTTTTCTTCTGTGCTTGTCTGAAATTTTAACTTTTGTAGGACTCATTGTGAATCTCTTCAT  
TGTAAGTGGTCAGTTACAAGACTTGCATCAAAAGCCACAGGATCTCTTCTGACAGACTCCTGTTCACTTTGGGCATCA  
CCAGATTTTTTATACTGTTACTGAATGTTGTTGTATCATCTCTCCAAATATGGAAAGGTCAGTCTCCTTATCCTATTTT  
TTTCTGTGATGTTGGATGTTTTTGGACTGTAGTAGTCTTTGGTTTGTAACTTGTCTCAACGTCTTGATTGTGTGAAGAT  
TGCTAACTACCAACTCAGTGTCTCTGCTGAAACGAAATCTACCACCAAGATGCCCCGGCTGCTGCTGGTCTGTGA  
TGCTGCTTTCTGTCTTACCACCTCTCTGTATATTATGCTCAGACAGTTGGCACCCTCTCTTGAATTTGTGACTATGAGA  
AATGGCACAGTATTTGACATCAATGAGGGACTCTTGTCTTGGTGACTCCTTGGTCTTGAGCTCATTTCTCCAATTCAT  
CATTAAATGTGACTTCTGCTTCTTTGTTAATCAATTCCTTGAAGAGACATATACAGAAGATGCAGAGAAGTGCCACTGTTT  
TTTGGAAATCCCCAGACTGAAGCTCATGTGGTGCTATGAAGCTGATGATCTGTTTCTCGTACTTACATTCCATATTCA  
GTTGTACCCTGGTCCATTATCTCCCTCTTCTATAGGGATGGATTTGAGAACCAAGTCTATTATGTTATTATGTCCAC  
CATTTACCCTCCAGGACATTCTCTTCTTATTCTCACACATCCTAACTGAAACAAAAGCAAAGAATATTCTTTGTT

TCAGTAAATAG

>Bota-T2R5p

AGTTTCGGAGAATGTCTCCGAACGTTACAGGGCGTCTCGTATAACCTCATTGTCTGGGCTGGCGGTCTGTCAGTTGCT  
TCTACAATGGTTGATTATGGTGGACTCAAGTCTGTTCTGCTTTTCCAGAGCAGCCATTGGCTTCGCTGGCTCAGTGTCT  
TCAGGGTTCTGGTAAGCCAGGTCAGCCTGTGGTTTGCGAGTTTCTCAGTGTCTTCTATTGTAGGAAGATCATGACCGTT  
GAACACCCTGTCTCTTTGTGGCTGAAGCAGAAGGCGTTACCTGAGTTGCTGGTGCTTTCTGGTGACTTCACGATCCATT  
TGTTACTTACAGTCAGGGGTAGCTTAGACTTCTCCAGTCTTCCCAAGGAAACAGCAGCATCTTATTTCCCATTTCAAAC  
TGGCACTATATATGTATATTACAGCTCAATACAGAAAGTATGATGCCTTTCACGATGTTTCTGTTTCTCTGGGCTGCT  
GTGTCTCTTTGTATAGAGCTACAGGAAGATGAAGGTCCATACAGCCGGCAGAAGAGATGCTCAGGCCAAGGCTCATATC  
ACTGTCTGAAGTCTTGGGCTGTTTCTTGTACTTTACATGGTCTACATCCTGGCCAGCCCTTCTCCATCAGCTCCAA  
GACTTTTCTGCAGATCTCTTACTGTCTTCATCTCTGAGACACTCATGGCCACCTACCTTTTCTTATTCTGTCTATAC  
TGATCATGGGAACCCAGGATGAAGCAGGCATGTCAGAGAATCCTGTGGAAGACTGTATGTGCTTGA

>Bota-T2R8p

TACTGGCACTACCCAGGTGTTTATGAAAAAGAGAAAAAAGGTAGTTCTTAATATCTTCTGGACATTACCAACTAC  
TTAAGTATGTGGTTTGCCACCTGCCTCAATGTCTTCTGTCTTTTCGAGATAGCCAATTTCTCCACCGACTTTTTCTCTG  
GCTGAAGTGGAATTGAGAGGGTGGTTCAGTGGAGCCTACTGGGGTCCCTGGCCATTTCCATGTTGATCAGCTTATACA  
AGCAACGTTAACAATTCTGATTATGATTTTCTTAAATGCAAAACATAAAAGAAACGTCACCGAATTGTTCCATGTGA  
GTAAATTAATACTTCGACCCATTGACATTGTTTAACTGTTTGTATTATTCCATTTACTGTGTCTTGTGATCTCATTT  
TTCTTTTAAATTACATCCCTGTGGAGATACAGTAAACAAATGAAATCCAGTGTTACAGGCTCCAGAGACTCCAGCACAGA  
GGCCACGTGGAGGCCAGGAAACAGTGACCTCATTTCTTTTCTTCTTTTGTATACTACCTGGCCTGTCTTTTGGCAA  
CATTTAGCGACTTTATGAAAGAAAGCAAGTAGCTATGATGTCTGGAGAGATTATAGAAATTTCTAATCCCTTAGGTCAC  
TCACTGTTTTTTATTGTTGGAATAACAAGCTGAGGCTGGCATCTGTGAGGACGCTGAGATGTGGGAAACAGCCTGCAT  
GATGTAA

>Bota-T2R10A

ATGCTGAGTATAGTAGAAGGCCTCCTCTTTTTGTAGCAGTTAATGAGTCAGTATTGGGGGTTTTAGGGAATGGGTTTAT  
TGGACTAGTAAACTGCATTAAGTGTGTGAAAAATAAGAAGATCTCTACTCAGCCTTATTCTCACTGGCTTAGCCTCTT  
CCAGATTTTTGCTGATATGGATAATAACTACAGATGCATATGTGAGGGTGTTTTCTCCAGATATGATTTGTCTGGTAAT  
CTAAGTCAATATATAGCTTACTTATGGATAATTATGAATCAATCAAGTGCTGGTTTACCACTAGCCTCAGCATCTTCTA  
CTTCTGAAATAGCCAATTTTCCCACTGCATTTTCTCTGGCTGAAGGGTCACATTACTGAGATTCTTCTTCTTCTAA  
TGGGATGTTTGCCATTTTCATGGTTATTTACTTTTCAAACATTACAATGCCTTTTATTAATAATATTATGAAGAACAGA  
AGCACAAACGGGTTGGTCACCATGCAGAAAGTGAATACCTTTATAAATCAGATTTTGTTCATCTTGGAAACATTTCTTGT  
CTTTGTACTATGGCTGATTACATGTTTCTTAATAATCACTTCCCTTTGGAGGCACAACAGGAGGATGCAATTGAATGCCA  
CAGGATTAGAGACCCAGTACAGAAGCACACATCAAAGCAATGAAGATTTTGGTGCTTTTATCATCCTCTTTATCTCTG  
TATTTGTAGGCACTGCCATACAAATATTAAGTGTGACAGTGCCTGAAACAAACTGCTATTTATTTTGGTATGACAAC  
CACCATCCTCTATCCCTGTGGACACTCATTTATCCTAATTTCTGGAACAGCAAGCTTAACCAAGCCTCTTTGAGGGTAC  
TGAAGCTATTAAGTGCTAG

>Bota-T2R10B

ATGCTGAATATAGTGAAGGCCTCCTCATTTATGTAGCAGTCAGTGAATCAGTATTGGGGGCTTAGGGAATGGATTTAT  
TGGAGTTGTAAGCTGCATTGACTGTGTGAAAGCAAGAATCTCTACTGTGAGCCTTATTCTCACTGGCTTAGCCTCTT  
CCAGATTTTGCCTGATATGGATGATAAATTACAGATGCATATATAAGGATGTTTTTCCAGATATATAATTTGTTGGTAAT  
ATAAGTCAATATATAGTTTACTTAAGGATAATTATGAATCAATCAAGTACCTGGTTTGCCACCAGCCTCAGCATCTTCTA  
TTTCTGAAGATAGCCAATTTTCCCACTGCATTTTCTCTGGCTGAAGTGTACATCAACAGGGTTCTTCTCCTTTTCA  
TGGGGTCTTGTCTTATTTTCATGGTTATTTGCTTTTCAAAGCATTGCAAGCCTAGTACCAATAATATTATGAAGAACAGA  
AGCACAACTGGCTGATACCATGCATAAAAGTGAATACTTGACAAATCAGATTCTGCTCAATATTGGAGTCATTCTTGT  
CTTTGTACTATGCCTGATTACATGTTTCTTATTAATCACTTCCCTTTGGAGACACAACAGAAAGACGCGATTGAGTGCCA  
CAGGATTAGAGATCCCAGCACTGAAGCACATATCAAAGCAATGAAGATTTTGGTGCTTTTATCATCCTCTTTATCTTG  
TATTTGTAGGCACTGCCATACAAATATCAGGTAGTAGTACTATGCCTGAAACAAACTGTTGTTTATTATTGGTATAAC  
AACCAGACTCCTCTATCCCTGGGACACTATTGATTCTAATGCTAGGAAACAGGAAGCTGAAGCAAGACTCTTTGAGGG  
TACTGAAGCCATTAAGTGCTGGGAAAAAGAGAACTTCTTAGAATTCATGA

>Bota-T2R10C

ATGCTGAGTGACTGGAAGGCCTCCTCATTTTTGTAGCACTTAGTGAGTCAATATTGGGGGTTTTAGGGGATGGATTTAT  
TGGACTTGCACTACTTATTGAATGTGTGAAGAACAAGAAGTTTTCTACTATCAGCTTTATTCTCATGGGATTGGCTACTT  
CCAGAAATTTGCCTGATAGGGTTAATAACTACCGATGGATTTGTGAAGATTTTTTCTCCAGAAATGATTTCTCTGTTTAC  
CTAATTGACTGTATTACTTACTCATGGGTAATTCTGAATCCAACAAGTGCTTTTTTGGCACCAGCCTCAGCATCTTCTA  
TTTCTGAAGATAGCCAATTTTCCCACTGCATTTTCTCTGGTTGAGGAGTGACGTCAAAGGGTTCTTCTCCTTCTGA  
TAGGATACCTTCTTATTTTCATGGTTAGTTACTTTTCACTAAGTATGAAGATAATTAGTGATTCTAGAGCAAAGAATAGA  
AGTGTAGTCTTTTCAGTTGAAGTGCATAAAGGTGAATCTTTAGAAACAGATTTTGTCTCAATCTTGGAAACCTTACCAT  
CTTCACTACTATGCCTGATTACATGTATCTTATTGCTCATTTCCCTTCGGAGGCACAACAGAGGATGCTACTGAATGCCA  
CAGGATTAGAGACCCAGCACAGAAGCACATATCAAAGCAATGAAGTTTTGATATCTTTTATCATCCTTTTTATTTTG  
TATTTTATAGGCATTACCATAGAAATATCATGCACTACTATGTCAGAAAGCAAGCTGTTGTTTATTTTGGTCTGACCAT  
CACTGCCCTCTATCCCTGGGACACTCATTTATCCTAATTTCTAGGAAACAACAAGCTAAAGCAAGTTTTTTTGGAGTAC  
TGAAGCAATTAAGTGCTGGAAGAAAGAGAAGCTCCTCAGAATCCTTGA

>Bota-T2R10Dp

ATGGACTGGTTGGATCTCCTTGCACTTAGTGAGTCAATATTGGGACTTTAAGGGAATGGATTTATTGGATTTATAAGCTG  
CATTGATGGTATGAAAAACAAGAAGATCTCTACTATCAGCTTTATTCTCGCTGGCTTAGCAACTTCCAGAGTTTGCCTGA

TATGGACAATAGTTACTGATGGATTTTTAAAGTTATGCTCTCCAGATGTACATTCTCTGGGAACCTAATTGAATATAAT  
GGTTACTTGTGGATAGTGATGAATCAATCAAGTATCTGGTTGTCTACCTGCCTCAGCATCTTCTATTTCTGAAGATATC  
TAGTTTTCCCACTGCATCTTCTCTGGTTGAAGGGTAGACTCAACATGGTTGTTTTCTTCTTTTGGGATGCTTGCTTA  
TTTCATGGTTAGTTACTTTTCCACATTTTGTGAAGATTGTTAATGATGATAAAAGGAAAAATAAACACAGTCTGGTCAA  
TGGATATGCATAAAGGTGAACCTTTTGGAAAACAAATTTGGCTCCATCTTGGTGTCATTCTCTTTTATACAATACCTG  
ATTATATGTGTCCTTGTGCTCATTCTCTTTGGAGACACAACAGGAGGATGCAATTGAATGCCACAGGATTCAGTGACCC  
CAGTACAGAAGCACATATCAAAGCAATAAAAGTCTTGGTATCTTTATCATCCTCTTTATCTTGAATTTTGTAGGTACTG  
CCATACAAATATCTAGTGTGACAGTGCCTGAAAACAACTGCTTTTATTTTGGTATGACAACCACAGTCTCTATCTC  
TGAGGTCACTTGCTTATCTAATTCTAGGAAATAGGAAGCTCAAGCAAGCCTCTTGAGAGTACTGAAGTCATTAAAGTG  
CTGGGAAAAAGAGAACTTCTCAGAACTCCTTGA

>Bota-T2R11p

ATGTTGAATATATTGGAGAAGATTTTCATGGTTGTGACTGGTGGGAATTTATAATAGGAATTTTAGGGAATGGATTAT  
TGGACTCACAACCTGCATTGCCTGGATTAGAAATCAGAAGTTGAGCTTGCTTGACTTCATTCTTACTAGTTTGGCCTTTG  
CCAGAATCAGTCAATTATGGATAACCACTGTCATGTTCTTTTCAATGATGTTCTATCAGGCAGGCTTTGGTACTGTGGGA  
AGAAAATATATCTTTTTTGTATCTGGATACTGACCAGTCACTCAAGCACTTGGCTTGCTACTTGCCTTGCTGTCTTTTA  
TTTCTGAAGATTGCCAGTTTCTCCCATCTCTTCTTCTTGGCTAAAATGGAGAATTAACAAGTTGTTTTCATGCTTC  
CACTGGTATCTGTGCCCTTCTAGTCATAAGTTTTCTTGGCCAAATAATGTTGATGTCTCTGGTGTCATGTCCAAAAG  
ATGTCATGAGAGAAGTATGACTGAGTTATGCAATGTGAATGAATATCAAAATTTAAATTTTATTATTATCTTACAATGGA  
GTCCCTCCCACTTCTTCTTCTTCTGATTTCTTCTCTGTTGCTCCATTCTTGTGGAACACAAGAAAGAACATTGC  
ACACACTGTGAGGAATCCAGAGACCCCCGTGTTGAGGCCCATTTAGAGCCATGAAAATGTGTTTTCTTCTCATGC  
TCTTTGTCTGTACCAATTTGGCCTTTTATGACATTTGGGGGGCATTTTTCTACAGAACAGCTGGCTGTGATGTTT  
GGTTATATGTTAGGAATGCTGTATCTTCAAGTCACTCATATGTTTTAATTTTGGAAACAGTCAAATGAGGAAATCTT  
CTTGGTGATTCTTAG

>Bota-T2R12

ATGGAGAGAACATTGAACAATATACTTACGATCATTTATGCTGGAGAGTTCTTACTGGGTATTTTGGGAAATGGATTAT  
TGTTCTGGTTAACTGATTGATTGGATCAGGAGTAGGAAGTTCTCCCTGATTGACTTTATTCTCACCTGCTTGGCTATTT  
CCAGAATATGTGTCTGTGCATAATGATTTCAAGTACAGGTTTATATGTAATCTCTAAGGAAATACGGTACAATAAGAAT  
CTCCTGATAAATTTGAGGTTCTCTGGACAGGATCCAATTATTTCTCCATAGCTGCACCACCTGCATCAGTGTCTCTA  
TCTCTCAGAATAGCCAACCTTTTGAATTTCTTCTCTGGATGAAATGGAGAATTCACAAGGTGCTTCTCATTATTG  
CACTGGGGGCTGTCTTCTTCTGCTTGTGCTTCTTCAAAAGGATGCGGTAGTTGAAAGCCGGCTCCAAAACAGGTA  
AACAGCGAAAACAATGTGACATTTGGACATTTCTAATGATAAAATATGATTTGTTCTTACCATAATGTTCTCATCCCTT  
TGTAAGTGTCCCTGGCCTCTTCTCTTTTAAATCCTCTCTTATGTGGTCATCTCAGGCGTATGAACGGTGTAGACTGTA  
GCTCGGAGGCCATGTGAGAGCCCTGAAGGCTATGATTTCACTCTCTCTCTGTTCTATACTATTTGAGCACTATT  
ATAACTGTGTGGGCAATCACATTTAGGTAGTTTCTGGCAAGATTTTGTGAACATGCTGTTATTTTCTGTCTTCT  
TGGCCACACTTTGCTTCTGATTTTGTGGAACAGCAAATGAAACAGGCTTCACTCTGTGCTCTAAGGAAGCTGAAGGGTT  
ACATGAATCTAAGAAAACCTGCTCTTCCAAAAGAGCCTGAAGCGATGA

>Bota-T2R13

ATGGAAGATTCCTTGGAAAACATCTTTATCACTTTAATAAATTCAGAATTCATAATTGGCATTCTGGGGAATGGGTTAT  
AACACTGGTGAACCTGACTGACGAGATCAAGATGCAAAAGGCTCTCTTGGCTGATCAAATCCTCACTGCTTTGGCAATTT  
CCAGAATTGGTCTGATTTTGGTAATGATAGTGAGTTTGTTTACAAAGGAGTCTTATCCATCTTCACTTTAGACATAAAG  
GGAAATAAAGTCATACTTTTATGATTGCTGGGCTCTTGGCCAATCATTTTATGTGCTGGCTTGTCACAGGCCTCAGCCT  
CTTCTATTTCTCAAGATAGTCAATTTTCAAATGCTGTTTTCTTCACTAAAGTTTGAATTTGAATGGTATGTTATGG  
TAATGTTTCTGGGACATTAGTATTGCTGCCTTAAAGTCTTACTCTGGTGAGTAGCTATATTAATATCAAGATACATCCG  
TATGAAAGAAATATGACTTTAAATTCATAAAGGCATGACACTGAAACCTTTTCCAAATTAATTATATTACCGTAGGATC  
TTTCTTACCTTTTATTATATCCCTGAGTTGTTTTCTCTATTAATGTTCTCCTACTGAAACATGTCAAGAAGATGAGGA  
GCCATGCAACAGGATTCAGAGATCCCAGCAGCAAAGCCTACGTCAGAGCCATGATCATGGTGATATCTTTTCTCATACTA  
CTTGCCATTCACTTCTATCTCATCTCATGACAATTTTATCACAATGTGATACAGAGTGAAGTGGCCTTTATGCTTAG  
AGAAGCTCTTGGAACTATTACCTTCACTCATTTTGTCTGATTCTGGGAAATGACAAGCTAAGAAAAGGTTACAC  
TTTTGGTGCTGTGGCAGTTGAGGTGTGGC

>Bota-T2R16

ATGACAACCAGCCAACCTCTCTGTCTTCTCATGATTATCTATATGCTCGAGTCTTGATAATAACTGGGCAGAGCAGCCT  
GATTGTTGTAGCGCTGGGCAGAGACTGGGTGCACTCAAAGGCTGCCACCTGCGGACATGATTCTCATCAGCCTGGGCA  
TCTTTTGTCTCTGTCAACTGTGGTCATCGATGCTGTACAACCTTTGTTCCCACTTCCACCCTAATTACAATTTTGGTAT  
TTCGGGATCATCTGGGAATTTACTAACATCTTTCTTCTGCTGAGTGGCTGCTGTCTTCTACTGTGTCAAAGT  
CTCTTTCTTCAAGCACCCTGCTTCTCTGCTGAGTGGAGAATTGTGAGATGGGTTCTCGGCTGTTGCTGGGCTCTC  
TGCTGATTTCTGTGTGTCTACCATATTTCCAGTACTAGTTATTACATTGATATTCAATTCATCGCCATGAAGCATTTCT  
CCTAGAAAACAGCACCATGCTTGAGAGACTTGAGGCTTCTGTTGGGATTTTCCCACTGCACAAAGTAGTTGTGTTGGT  
TATTCCTTTCTCTGTTCTGCTGCTCCACAGTCTTGTCTCATGGCTTATTATCCCGACATCTGAAGCAGATGAAAGACC  
TTCACACAGGCTGCTCAACTCCAGCCCGAAGCTCACTCTGCCGCCCTGAGGTCCCTTGCCATCGTCTCATCTTGTTC  
ACCTTTTATTTTCTACCGTGCTCTCTCCATATTGGATGTCTTATTAATAAAGAGTCTGGTCTGGGCTGGGAAGC  
TATCATCTATGCATTAGTCTCTATTCTACTTTACTAATGTGAGCAGTGTCAAAGTGAAGAGATTTTAAAGGCAA  
GGTGCTGAGCCTAGAAGCTGCCTGA

>Bota-T2R39-partial

ATGATCCAAACCTGCAGTTCTCAGAAAATGATCTGTCAACATCTCTTGTCACTTTGATGTTAATAATTATCGGCACGGA  
ATGCATCCTTGGTATCTCGCAAATGGGTTCAATGCAAGCATAAATACAGCTGAATGGATTACAGTAAGGTACTCTCCA

CCAGTGGCAAGATCCTGCTTTTCTGGGTGATCCAGAATAGTTCTACAAAGCTTCATGATGCTAGAACTTACCTTAAGC  
TCAACATCCCCACAGTTTTATAATGATGACATCATGTATCACACATTAGAGGATGTTTCATGTTCTTAAATCACTGCAG  
CCTCTGGTTTGCTGCCTGGCTCAGTGTCTTCTACTTCGTGAAGGTGGCGGATTTCTCCTACCCCCCTTCTCAAGCTGA  
AGTGGAGAATTTCCGACTGATGCCCTGGCTTCTGCAGCTATCAGTGTGTTGTTTCTTGGGCCAGAGTGTGCTTCTTTC  
CAAAACAATACTATAAGTAACAATCTTTTTCTCTCCCGTCTTCAACTCCACTAAGAAAAAGTCTTCGCGGA  
GTCCGCTGTGATCAACCTGGTTCTTTTCTTAACCTGGGGATCTTCATCCCTCTGATCATGTTTATGCTGGCGGCCACCC  
TGCTGATCATCTCTCTCAAAAGACACATCTCCACATGAAAAGCAACGCCACTGGCTCCAGAGACCCAGCATGGAGGCT  
CACCTGGGGCCATCAGAGCCATCAGCTATTTCTATTCTCTATATTTCAAAGTACTTGCTCTCTTCTCTACATGTC  
CAACTCTTTGACATCAATAGTCCCTGAATATTTGTGCAAAATCATCATGGCTACCTACCTGTG

>Bota-T2R40p

ATGGCCTCATCACCGTCATCCATGGAGCCGAGTGGGTGAGAGGCAAAAGACTCCCCATTGGACTGCATTCTGCTCATGCT  
GAGCTTTCCAGGCTCTTGCTACAGATTTGGATGATGCTGGAACACGTACAGTCTGCTGTTCTGGGTCATCTACAATG  
AAAAAGAGTATACATACTTTTCAAAACCATCATGTTTCTGAATACTCCAACCTCTGGCTTGCTGCCTGGCTCAAT  
ATCTTCTATTGTCTTAGAATCGCAAGCTTTTACTCACCCGTGGTCTCCGTGATGAAAAGGAAGGTCATGGCTGATGCC  
TGGGCTTGAGGCTGTCTTGTCTTCTCTCTTTGCTCCAGCTTCCCTTCTCTAAAGGTATATTCAACGTGTATGTGA  
ACAATTCGTCCTCCATCCCTCTCAACTCCACTGAGAAGGTGACTTCTCCGAGACCAACATGGGCAACTTGGTTACC  
ACCTTTACCTGGGATCTTCATCCCTCTGATCATGTCTATGCTGGTGGCCACCCTGCTGATCATCTCTCTCAAAAGACA  
CACCTCCACATGAAAAGCAATGCCACTGGCTCCAGGGACCCAGCATGGAGGCTCACCTGGGGCCATCAGAGCCATCA  
GCTATTTTCTCATTTTCTACATTTCTCAATGCAGTTGCTCTGTTTTTTTCCATATCAACATCTTTGCCGCCAACAGCTC  
CTGGAATATTTATGCAAAATCATCATGGCTGCCTACCTGCTGGCCACTCAGTGTACTGATCTTGGCAACCTGGGC  
TGAAAAGGCATGGAAGCAGTTTCAGACCAAGTTCATCTCTACCTGTAA

>Bota-T2R41-partial

ATGCATCCAGCATTACAGTCTCTTCTCATGCTGCTTTTGTCTGCTGTGATCCTGGGCCTCTGGCCAATGGCTTCAT  
TGTGCTGGTCTGAGCAGAGAATGGGTGCGACGTGGGAGGCTGCTCCCTCTGACCTGATCCTCTTTAGCTTGGGACTCT  
CCCGCTTCTGCCTGCAGTGGGTGGAATGGGAATAACTTCTACTATTTCTTGCATCTGGTCGACTACTGCAGTGGTCCC  
GCCCGCAGTTCTTTGGTCTACCCTGGGACTTCTCAACTCTGTACCCTGGTGGTGGCTCTGGCTCAGCGTCTCTT  
CTGATGAAAGGTTGCTAACTTCAACCCACCTGGCTTCTCTGGCTAAAGTGAGGTTCCCCAGGTCAGTGCCCTGGCTT  
TGCTGGGCTCTCTCTCACTCATTCTGTGCTACCTACTGTTTTTGGGGGAACACGCTTTGTATAAAGAGTCTCTC  
ACTAGAAAACCTTCAAGAATATGACCTACTATCAGTGGACAGGATTTCTGGAAA

>Bota-T2R43p

ATGATAATGTTTATGTCAACATTGTTTCCATTCTATTAATGACAGAATTTGTTCTGGGAAATTTGCCAATGTCCTCAT  
AGCACTGGTGAAGTCAATGACTGGACCAAGAGACCAAGATCTCAGCTGATGGGATTCTCACTGCTCTGGCATTCTGCA  
GAATTGTTATGCTCTGGGCAATGTTAATAAATTGGTATGTAATTGTGTATAATTTAACTCTATATAAATCAGAAGTAAAA  
ATTATTGTTTATGTTGCCTTGACAGTAAGCAACATTTTAGTAAGTGGCTTGTCTACTAGCCTCAGTATATTTTATTTGTT  
GAAGATAGCCAAATTTCTCAGCCTAATTTTTCTTACCTGAAGTGGAGAGTTAAAAGTGTAGTTCTCATGATGATGTTGG  
GGACGTCAATTGTTCTGTTTTTCAAGTGCAGTGTAAAGCATGGATGAGGCTATTAGACAAATGAATATGAAGGAAAT  
ACCACTCAGAAGATCAAACTAAGGGACATTTTACACCTTTCAATGTGACTCTGTTACACTAACAACTTTATACCTT  
CACTATGCTCTTGACATCTTTTCTGCTGCTAATCTTTCCCTGTGGAACATCTCAGGCAGATGCAGCTCAATGGTAAAG  
GATCCCAAGATCCAGACCAAGGTCCACATAAAAGCCATGCAAACTGTCATCTCTTTCTTTTCTGTTGTTATTTAC  
ATTCTGGCTCAATTGTATCAGTTTGAATTCTAATCAGCTGCAGAAAGAACAGTCCAAATGCTTTATGATGTTGTTTT  
AATCATGTATCCTCAATCCACTCATGTTATCTTGATCTGGGAAATGGGAAATTAAGTCAAGCCTTTCTGTCATTTCTA  
TGGCAGTCAAGATGCTGGCTGAAGGAAAGGAAATAG

>Bota-T2R44-partial

TGGGAAATTTGCCAATGTCCTCATAGCACTGGTGAAGTCAATGACTGGACCAAGAGACCAAGATCTCAGCTGATGGG  
ATTCTCACTGCTCTGGCATTCTGCAGAAATGTTATGCTCTGGGCAATGTTAATAAATTGGTATGTAATTGTGTATAATTT  
AACTCTATATAAATCAGAAGTAAAAATTATTGTTTATGTTGCTGGACAGTAAGCAACATTTTATAGTAAGTGGCTGCTA  
CTAGCCTCAGTATATTTTATTTGTTCAAGATAGCTAATTTCTCAGCCTAATTTTCTTACCTGAAGTGGAGAGTAAAA  
AGTGTAGTTCTCATGATGTTTTGGGACTTCAGTGATTTTGTGTTTTTCAAGTTGAGTGTTAAGTATAGATGAGACTAT  
TCAGACAAGTGAATATGAAAGAACATCACTGAGAAGACCAATTAAGGGACATTTTACACCTTTCAAAATATGACCTGC  
TCACACTAACAACTTCATACCTTCACTATGTCTCTGGTATCTTTTCTGCTGCTAATCTTTTCTGTGGAACATCTC  
AGGAAGATGCAGCTCAACGGCAAAAGATCCCAAGATCCAGCACCAAGGTCCACATAAAAGCCATGCAAACTGTCATCTC  
CTTTCTTTTCTGTTTGGCACTTACATGCTGACTGTAATTTTAAACAATATGGAATCTAATGAGCTGCAGAGGAACTGG  
TCCAATGCTTTTCCAGGCTCTTGCAATCACATATCTTCAATACACTATTATCTGATTTGGACAAACAGGAAATTA  
ACACAGACCTTTCTGTCAATTTCTGTGGCAGCAAGATGCTGGCTAAAAGTAAAGGAACTAGGTAG

>Bota-T2R45p

ATGATAACTTTACTATGGACATTTTTTCCATCCTAGTATTAACAGAATTTGTTCTAGGAAATTTGCCCATGGCCTCAC  
AGCACTGGTGAAGTGCATTGATTGGGTCAAGAGACAAAGATCTCCTCAGCTGATGGGATTCTCACTGCTCTGGCAGTCT  
GCAGAATTGTTTTGCTCTGGGTAACGTTAATGAATTGGTACTTAGTTGTGTTGAATCCAGTTCTATATAGTTTAAAGTA  
AGAATTATTGTTTATGCTGGATAGTAAGCAACATTATAGCACCTGGCTTGTACTAGTCTCAGCATATTTTATTT  
GTTGAAGATAGCCATTTCTCAGCCTAATTTTTCTTACCTGAAATAGAGTTAAAAGTGTGATGCACATAATACTTCTGG  
GAACCTCATTTCTCTTGGTTTTTCTGTTGAGTGTATACAACGATAAGGCTATCCAGACAAATGAATACAAAGGAAAC  
ATTCCTCAGAAGACCATATTGAGGGGAGTTTATGGCTTCCACATGTGACTCTGCTTATGCCAGGAAATCTCATATGCTT  
TACTATGCTCCTGACATGTTTTCTGCTATTAAGTGTGCTGTGGAACATCTCAAGAAGATGCAGCTCAGTGGTAAAG  
GATCTCCAGATTTAGCACCAAGTCCATATAAAAGCCATGCAAACTGTGATATCTTTCTTTGCTGTTTGCATTCTG  
TTCCTGGCTCTAAATGGATCCATTTGGAGTTTTAAAGGCAGCAGAAGGAACTGTCTTTTGTCTTTGAGGCTCTTG

GATTCCTCTATCCTTCAAACCACTCATGTATCCTGATTTGGGAAACAGGAAGTTAACAAAGGCATTTCTGTCAATTTCTG  
TGGCAGCTAAGGTGCTGACTGAGAGAAAAGAAATAG

>Bota-T2R46

ATGATAACTCTACTATCAACCATTTTTTCCATCCTAGGAATAATACAATTTGTTCTGGGAAATTTGCCAATGGCTTCAT  
AGCCCTGGTGAACCTGACTGGGTCAAGAGACAAAAGATCTCCTCAACTGATGTGGTTGCTACTGCTATGGCAGTCT  
CCAGAATTGTTTTGTTCTGTGTAATGTTAATACATTGGTATTATATTTTGCTTCATCCAGCTTTATATAGTTTAAAGTA  
AGAACTATTTTTCATGTTGCCTGGACAATAAGCAATCATTATAGCACCTGGCTTGCTACTAGCCTCAGTATATTTATTT  
GTTGAAGATAGTCAATTTCTCCAGCCTAACTTTTCTTCCCTGAAGTGGAGAGTTAAAGTGATGTTCTCATGATGCTTC  
TGGGAACTTCATTCATTTTGGTTTTACAAGTTGTAGTTATAAGCGTAAGTGGGACTATGCAGAGAAGTGAATTTGAAGGA  
AACTTCACACAGAAGACCAACTGAGGGATATTTTATGGCTTTCACATGTGACCCTGCTCATTCTAGGAAACCTCACACC  
CTTTACTATGTTCTTAATATCTTTTCTGCTACCAATCTTTTCCCTGTGTAACATCTCAGGAAGATGCAGCTCAATGGCA  
AAGGATTCCAAGATCCCTGTACGAAGGTCCACATAAAAGCCATGCAAACTGTATCTCCTTTCTCTTGCTATTTGCCTTT  
TACTTTCTGGTTCTAATCATATCAATCTGGAGGCCTAAAAAAGTGCATGAGGAACCATTTCTCTTGCTTTTCCCAACAGT  
CAAAGTCATCTATCCTTCAGTCCACTCATTATCCTGATTTGGGGAAACAGAAAGTTAACACAGGCCTTTCTGTTGTTTC  
TGTGGCAGCTGGGGTGCTGGCTGAAAGAGAGGAAATAG

>Bota-T2R47p

ATGACAACTTTACTACATTTTTTCCATTCTGGTAATAGAATTTATTCTAAGAAATTTGCCAGTGGTTTCATGCTACTGG  
TGAAGTGCATTGACTGGTCAAGAGACAAAAATCTCTTCAGCAGATGGGATTCTCACTGCTCTGGCAGTCTCCAGAATTG  
GTTTGCTCTGAGTAACATTAATAAATTTGGTGTGAAAATGTGTTAATCCAGCTTTAGACAATTTAAGAGCAAGAATTAT  
TATTATTGCTGGATAATAAGCAACTGTTTTGGTACCTGGCTTGCTGCTATCCTCAGCATATTTTATTGCTCAAGATAG  
CCAATTTTCCAATATTATTTTTCTTTACCTAAAAATGGAGAATTTAAATGTTCTTCTGTTCACTTTGCTGTTTGGTT  
TTATTAATTCATGGTGAATATGAACAAGACTATCCAGACAAATGACTATGAAGGAAACATCACTCAGAAGACCAAGCT  
GAGGGACATTTTACACCTTTGAAATATGACTCTGTTTCATGCTAGTAACTTCACACCCTTTGCTATGTCCTGACTTCTT  
TTCTGCTGTTTATCTTTTCCCATGAAACATTTTCAAGGAAGATGCAGCTCAGTGGTAAAGGACCCCAAGATCCAGCACC  
AAGGTCCATATAAAAGCCATGCAAACTGTATCTGTTTTCTATTTGCCATTTGCTTCCGGGTTCTAATTTTCTGTTTGAA  
GTTCTAATAGGCAGTGGAAACACTTGGTTATCATGGCATGCCAGGCTTTTGAATCATATGCTTCACTTATCCTGACA  
TGGGGAAAGCAGACACTAGGACAGTCTTCTCTGCTATTTCTGCAGCAGCTGAGTTGATGGCTAAAAGAAAGGAAATAA

>Bota-T2R56-partial

ATGGTTCCTGGACCTCAGTTGGTTGATAAGACAGCCCTGTCTGCATTATTATTTTATTCCTTTTGTCTGGTGGCATT  
GGTAGGTAATGGCTTAATCATCATGGCACTGGGCAGCGAGTGGCTGCTGCAGAGAACGTTGTGCTTGGCATAAGTTAT  
TGGTCAGCCTGGGGCCCTCTCGCTTCTGCTGCAATGGGTGGTGATTAGTAAGAACATTTACATTTTCTGAATCCCATG  
GCCTTCCCATACAACCCCGTGTTCAGCTCCTGGCCGTTCAAGTGGGACTTCTGGAACCTCTGCAACACTGTGGTTCTCCAC  
CTGGCTCAGTGTCTTCTACTGTGTGAAAATTGCCACCTTCACCCACCCCGTCTTCTCTGGCTAAAGCGGAATGTATCTG  
GGTTGGTTCTTGGATGCTACTCAGCTCTCTGGGGTCTCTACCTTTACCACCATTTCTATTTTTCATAGGCAACCACAGA  
ATGTATCAGAACTATATAAAGAAGGGTCTGCAACCTTGGAAATGCTCACTAGGAATGCTGTGAGAACATATGAGAGGTTCTG  
CCTCTTCCCTTTGAGAATTGTTACCTGGACCGTCCCTACTGTTATCTTTATTGTGGGCACAGTTTGTCTATTACATCTC  
TGGGAAGACACACCAAGAAGGTCTTCTTCTCATCTCAGGCTTTCACAGTCCAGTGGCCAGGCACACATCAAGGCTCTC  
TTGGCTTTTATCTCCTTT

>Bota-T2R62p

ATGTTGATATTCAAAGTCATCTTTTTCTGGAGTCATTGGTTGCTGTCTGCAAAATGGCTTCATAGTTACTGTGTTGAG  
CGGGGAGTGGGTGTGAAGCCAGATGCTGCCCGTGGTGACATGATTGTGACCTGCCTGGCTGCCTCCTGGTTCTGTCTGC  
ATGGGATGGCCCTCTGAACAACATCATGGCTCTTCTGGCTTTTGTCCAAAATCGACTATTTCAAGATTCCCTGGGAT  
TTCATCAACTGCCTCAGTTTCTGGCTGACTGCCTGGTTTGTCTGTCTTCTACTGCGGAAGATCTCCCTCTTCTCTCATCC  
CCTCTTCTTCTGGATAAAATGAGGATTTCTCGGTGCTTCCCGAGCTGGTGCTGGGCTCCTTGATCTTATCTGGTCTGT  
CCGTCATCTCAGCTGCTGGGAATACAATTCTTGCCAGATGACGGCTGCCAGATTTCCTATGGAACGACACCCTGGCT  
GGTAGAATACATGCTACCTATTTGCACTTTTTCTACCTCATGTAATTTCTCATGTGTTGGTTCCATTCTCTCTGTTCTCTG  
GTGTCACCCCTCTCGCTCATGTTCTCACTGCGCCGGCACCTCTGGCAGATGCAGGACCACAGACCCAGCCACGTGATCC  
CAGTACCTGGGCTCACACCATGGCCCTGACGTCACTTGCCCTTCTCTCATTTCTACACCTTGACTTCTGTCCCTGG  
TTATCATTATGTACATCCAGCCCTCCAGGAACACTGGCACTGGGCTGTAAAGGTGGTGACCTACACGGGCATCTGTCTG  
CACTCCAGCATCTTGGTGACAGCAGCCCCAAGCTGAGAAAGGGCTGAAGAAGAGGCTTTGGCGAGCCCTGGACAAGGA  
CCAGTTTGTCTCCAGTTATCAGTATCAATAG

>Bota-T2R65A

ATGTCTGACTTTGTGCGACCCCATAGACAGCAGCCACCAGGCTCCCCCATCCCTGGGATTCTCCAGGCAAGAACACTGG  
AGTGGGTTGCCATTTCTCTCTCAATGCATGAAAGTGAAAGTCAAAGTGAAGTGCCTCAGTTGTGTCTGACTCCTAGCG  
ACCCCATGGACTGCAGCTACCAGGCTCCTCCATCCATGGGATTTTCCAGGCAAGAGTACTGGAGTGGGGTTGGGCACTA  
ACAAATCACTTAATATCTGTTTGCACCTGCCTAAGCATATTCTACTTCTTAAAGATAGCCAGTTTCTCTCACTTCTT  
TTTCATGTGGCTGAAATGGAGAATGAACCGAGTGCTTCTGGTGCTTTTCTGGCCTTTTCTTTTATTATCTTTTGACC  
TCTTAATGCAGGATGCTCTTGGTGAGTTGTGGATGAACACCTTTAGAGAACCTGAAAGGAACATGACTTTGCAATTTAGAT  
GCAAGTAAAATTTCTATCTTAAAGCCTTATTCTTCTCAGATTGACATATGTTATCCCTTTTCTTCTCTCTTGGCTTC  
TTTCTGCTTTTCTTCTTCTTCCCTGGTGAGACACATCAAGAATTTCAAAGTCAACTGAACCACTCGAGAGACTTCAGCA  
CAGAGCCGATAAAAGGGCCAGGAAATGGTGACAACATTTCTCCACCTCGTCATGTTTACTTTATTTCCATTCTAATT  
GGAGAATGGATCTTCTTAAAGTACACTGGTATGAGGTCATGATGTTGTATGCTGATTCCAATCTCTTTTCATCCGG  
CCACTCGTTTGTATAATTTTGGGAAACAGCAAGCTAAGGCAGATTGCTTTCAGACTATTGTGGGGTCTTAAGTTCTCTA  
AAAATAA

>Bota-T2R65Bp

ATGTCAGTTGGAATGAAGGGCTCTTTCTACTAGTGGCAACAGGAGAAGCTCATCTTAGGAGTGCTGAGAAATGGGTCAAGA  
ACAGGAAAGTCTCATCAGCTGGTTTCATCCTTACCTGCTTAGCTGTGGAGAGAATCATTCAAATGTGGGTAACACTATTG  
GGTTCATTTACACGCGGGCTATTTTCACATCTGTATGCTACCAGCAAAGTAGCAGAGGTGATTACTCTTTTTTGGGCACT  
AACGAATCACTTAACCTACCTGGTTTGCTAACCCCTAAGTGTGTCCATTTCTTTAAGATAGCCAAATTTCTCTCATTTCTT  
CTTCACATGGCTGGAGTGAGAACAGAGTCACTTCTTACTTTTCTGGGCTCTTTGCTCTAACTGTCTATTAACC  
TCTTAATGCTCTTGGTGAGTTTGTGGATGAGTAGCTATAGAGAGCCTGAAAGAAACACAGCTTTGCATTTAGATGCAAATA  
AAATTTTCTATCTTAGATGCCTTATTCTTCTAGCTTGACCTATGTTATCCATTTTCATCTCTCCCTGGCCTCGTTGTGC  
TTTTATTTTCTCCTTGGTGAGACACACCAAGAATTTCCAACCTCAACCTGAATGGCTCAGAAGACACCAGCTCAGAGGCC  
CATAAAGGACCGTGAAGGGTGACAACCTTCCTCTTCTGTTTCATCTTACTTTTCCACTCCATTAGGGAGCTGGA  
TCTTTCTTAAGGTACAGCAGTATCAGGCCATGATGTTTGCATGAAGATTTCAACTGTCTTCACTTTGGGTCTCTTATG  
TTTTAATTTCTGGGATTAGCAAGCTAAGAAAGATCACCTTGAGTTTAATTTTGAATCTTATATTCTCTTGAGAAAACCA  
AGATCATTAGTTTCATGGACAGAATTTAAATGTACTTTATGTATTCTGGAGAAAATGCCTTAA

>Bota-T2R67

ATGCCATCTGGAATTGAAACACCTTTTCTAGCAGCAACAATAGGAGGATTCTGATTGGAATTTTGGGAATGGGTTCAT  
TGTAAGTAACTGCATTGACCTGGTGAAGAGACAAAAGCTCTCATCAGCTGACTGCATCCTCACAGGCCTGGCTATCT  
CCAGAATCAGTCAACTTTGGGAATACTATGTGACTCATTTTATTGGTACTATGGCCACACCTATATGCCATTGATAAA  
CTAACAAAAGTTGTTAGTAGTTTTTGGATATTGTCCAATCACCTAGCTACCTGGTTTGCACCTGTCTAAGTGTCTTCTA  
CTTCTTTAAAGTAGCCAATTCTCCACCCCTGCTTCACTTGGCTGCGGTGGCGAATTCGTAGTGTGGTACTGGTGCTTC  
TCTTGGGGTCTTTGCTTACTGTTCTTTAATTATGAATCAATATATACACTTAGTCATATCTTAACTAACAGCTACAAA  
ATATATGTAAGAACTCAACGTGGTCTCAGATGTAAGTGAACTCATTATCTTACCAGTTGATTGTTTTAACTTCAT  
CAACTTAATCCCCTTTCTTCTGCTCCCTGACCTCACTGCTCTTCTAGTTCTCTCCTTGATGAGACACATCAGGAATTTGC  
AGTTCAACCCAGCTCAAAGGATCTCAGCACAGAGGCCATGAAAGAGCCATGAAATCGTGATGCTTTCTCTTCTCTC  
TTCATCATTATGCTCTTCCATCCTATTAATAGCTTGGGTTTTCTTAAACTGCAGGGACGCTGGGCCAATTGGTGGT  
TGTGTTAACTTCGACTGTTTTCTTCAAGCACTCCTTATCTAATTTTGGGAAATAGCAAGCTGAGACAGAATGCCT  
TAGGACTACTGTGGTATCTTAACTGCCACCCGAAAAGAGTGAATCTTAGCTTCATAG

>Bota-T2R71p

TCAGCAGTGACCAAGTAACCAAGGATTTCACTTCTGCAGTCATGTCCAGTGTAATCAAAAGATTTTATGATCATTGAAA  
TGTTATAATTCATAACAGGAATAACTGTGCTGACTTTGTCAAAGCAAGAATAGTGCCTTGTGTTGACTTCATCTTACAT  
GGATTAGCGTGATGTTTCTACTTTTCTAGATTGCGTTAACTAGTGTTCATCTAGAAATATTAGATGGTCACCAAGTA  
ATAAGAGGAGTTTCTGAGTTCTCCTGGAGTCTGAGAACTCATTAAAGTACTGGATGTGCTGCCTGCCTCAGTGCTTCTA  
CTTCTCTCAAGCTATCTGTTTCTCACCCCTTCTTCTGCTGGTGAAGTGAGAAGAGATAGAGTTGTTTTACCATT  
TGTTGGGATTCTGTCTTTTTGATTTTTAACCTTCTGAGCATAAAAATTTACTTTTGTGTTGCAAGCATTTAGAAA  
AGGAAAGACTTAACCTGGAAAAAAGATGCATAAAAAATCAGTATTATAACAGTCAAGTTCTCTTACAGCCTTGGGTCTCT  
CATCCCCTTGTCTGTATCACTCATTATTTTTCTGTTAATCTTTTCTATGGGACATACCAAGCAGATGACATGCCA  
TAACACAGATCCCAGGGACTTCAATGCCGGGAGCCACCACGGGAGATTCCACCCATGACAAAGGTCATGCGGAAGAGACC  
TGACAGGCAAGGAGGATCAGGCCTCAAGGGACCCCTGAATCTTCTTGAGCATCTACCCCAAAACCAAAATCTGTCTAC  
TGTTTATTATATTATGCCTTTACCAACTCTTCTGTCTAATACAGGGGGCTATCCCCAACCGGGAGAAATATCAATAACC  
TCAGATATGCAGATGACACCACCCTTATGGCAGAAAGTGAAGAGGAACTCAAAAGCCTCTTGATGAAAGTGAAGAGGAG  
AGTGAA

>Bota-T2R72p

ATGTCAAGTGTAATCAAAAAGTTTTTATAACCATTGAAATCTTAGAATTCATAACAAGAATTTGCAGAAATGAATTCAT  
TGCACTAGTACTCTGTGCTGACTCTCTCAAAGCAAGAATGTCTCCTGTTTGACTTGATCTTAACAGGCTTGGCCATCT  
CCAGAACTGGCATGATATTCTAATTTTCTGGATGGCATTAGAATAGTGTCTATCCAGGAATATTTGAAAGTCATCAG  
GTAATAGATGAATTTTTTATTTCCCATCTGTTGGGATTCTGTATTTCTTTGATTTAATTTTCTGAGTATAAGTTTTCT  
ATACATTTGGGGTCACTGACCATTTAGAAATAGAAAATAACTTGACTTGGGAAAAATATGCATAAAATCCGATCCTATAG  
CAGTCAAATCTCCTCCACCTAGGATCTCTCATCCCCTTGGCTGTGTCACTCATTTTATTTTCTGTTAATCTTTTCT  
TATGGAAACATACCAGGCAGATGACACGTGTCAAAGGATCCAGAGACCTCAACACAGGAGTCTTGTGAGAGCCAGA  
AATACATGACTTCTTCATCATTTTTCTAGTTGTGCACTATTTGGCTACATTTCTGTTAACTTGATCTGTTTACACATA  
GAAAATGAAATGACTTTTATTGTTATTAAGTCTGTAGCATTTCTCTATCTTCAATTCACCCCTTTATTTGATTCTAGG  
AAACGGAAAACCTGAGA

>Modo-T2R1

ATGACACGTCTATTTTAAATATCCAATTAATTTTGGGAGTGGTCCAATTTCTTACAGGAATTGTGGCAAATGGAATTAT  
CGTGATAGTGAGTGGCATTGAGTGTATCAAGAGGAAAAAGTACTGCATATGACCTCCTTCTGATCAGTCTGGGAATCT  
TCAGAATTTTTTACAAGCTTTAATACTTACATGTCACATGATATTTGTCTTTACTCTAAATATATATGTAGAAAAGGAA  
GCATTTTATTCTTTATTTTGTAAATGAAGTCAATCTTTGGCTTGCTACCTACCTTTGTCTCTTCTACTGTGTTAAGAT  
TGCCAAACATTTTACCCCTTCTCTGTTGAAGATGAGGATCTTAGGCTTGATCATGGCTGATTCTGGGATCAC  
TGCTATTTTCACTTGGCCCTTCTGTATGCTATTTACTTCTCTATTGGCTGAGGCCAAAGAGGAGATAAGAAGATATTTT  
TCAGGAAACCTCACTGCCTCCAATTTTATCTAGTCTTTTCCAGTTCCAATTTCTGTGGTGGGACTGATAGTGCCATT  
AGTCATATTTGATGCTTCATTGTTTCTGATGATCTATTCTGTGTAGACATACCAGAAAAATGAAAAGCATGGCACTG  
GCAGAGACTTAAGCACTGAAGCTCATATCCGTGCTGTGAATCTGTGTTCTCTTCTTCTCCTGTATACCTCCTATTAT  
ATGGGGATAAATAATATCATTATCTAGAACTTCTCACAGAATGAATCTTCAATGTTTCTTTTGTGGCTGCTGA  
ATATCCTTCTGGACACTCCATCATCTTAATCTAGGAAATCAAAGTTGAAGCATTATGCAAGAAAGTTTCTGCTTTGTG  
CCAAGTGCTTGTGGGAGGAGATTCAACAGGAGTATACAAACCAATAGAACATGCTGCTTCTAA

>Modo-T2R2

ATGGGAGTTCCAGTAGGAAGCATGATCTCTCTGGCAGAAGTTTGTACACCTCAGTCTGATAGCCCTGTTTATTATGGG

GACTATTGGAATGGCTTTCTAGTGGTGGTGAATGGTAGTAACTGATGGGAGACCAGAGACTGATTGGCATTGAGCTCC  
TCCTCTATGCCTTGGGATGTCACGGCTTGGCCTGCAGATTTTGTAAACGTTTCAAGGACTCATCAGTGTCTCTTTGCC  
AAGTTTTACCTGCACAATGTCTATGGATCTCTGTTCTCTTATCTGGATGTTTCTAAACTCCTGTAGCCTCTGGTTTGC  
CACCTGCCTTGGCATTCTACTGCCTTAAATCTCTGACTTCACACATCCCTGCTTTTGTGGCTGAAGTTCAGGGTCT  
TCAAATTGATGCCCTGGATGCTCCTGGGAAGCCTGCTGGCCTCTGTGGTCATTGCTGGGCTCTGTGCCTGTATGTTGGAC  
TACTCTATCGCTCCAACACAGACTGGCCAAGAATGTCTCTCAGGCTGGTGCTGATTCTGTAAGCGTCATCATCAATGA  
TGTGCTCCTGTCAACTTCGCATTAATATGCCCTCTGTGTCTGTTGTAATGTGTACGGTGATGTTATTTGTCTCTTT  
ACAACCATACACACCGGATGCAAACCCAGTCCCTGGATTGGGGAATCCCAACCCGAGGCCACATCAATGCCTTGAGG  
ACTGTGATCACATTTTTTGTCTCTTCGTTTCTACTTTGCAGCCCTGATGGTGAACTGACGTTCAATTGTGCCCTTCAA  
AAGCCACTGGTTCTTCTTCTAAATCTGTGATGGCAGCTACCCCTCCGGCCATTCCGGTGATCATCATCTTAGGCAATT  
CCCAGTATTGGCAGCTGTTCAAGAGGATCCTGCCTGA

>Modo-T2R3A

ATGAAGAGTTTATTCAAAACTTTTTTGTCTCATGGCCTTCATTGAGTTCATCCTGGGGATTTAGGGAATGGCTTTCT  
TGGGCTTATCAATTGCATCCACTGGGTCAAGAGCAGCAAGATCTCCTTATCTGACTTAATTATTATGAATCTAGCTTTCT  
CTAGGATCATTCTGCAATGTGTGATAAGTTTGGATGGTGTGTCTGGTGTCTATCCTAGTATCTATGATTAGAGAAA  
TTCATTCAAATTCGTGAAATTGGCTGGACCTTTAGTAACATTTAAGCATTGGCTGGTCACCTGCCTCAGTGTCTCTA  
CTGCCTGAAGATTGCCATTTCTCCACCCTGCCTTCTCTGGCTTAAATGGAGGGTTTCCAGGTAGTTGCCTGGATTC  
TGTTCTTTCTGTGCTCTTCTCTCTCAATATAGTGTCAATTGATCCGAAAATTCAGTATGTATTCTGACTTCCTTAAA  
ATGAAGCACATTGAAACTGCACTGAAATTAGCAGAAGAAAAGAAATGGAATATTATAATGCCAGATTATTGGTCTCCT  
GTGGTCAGTGATACCTTTCATTATATCACTGATCTCCTATTCTACTTATCCTCTCCCTGAAGAGGCATACCAGAATGC  
TACAGACCACATCACTGGCCCCAGAGATATGAGTTCTGAAGCCCATGTGAAAGCCACCAAGTAATGTTTTCTTTCTC  
TTACTTTTTGTCTTTTATCTTATCATTATGTACATTGGGTCATCAAACTTCTTCTTGACAGACCAAGTTATCAATAAT  
GATTATAGAGTTGGCTGCCCTCTCTATCCCTCTGTGCATCTTTCATCCTCATTCTTCAAAACAAAACCTGAAACAGG  
AGTTTTTGAGGCTTCTGTGGTTGAAAAGGGCTGCATAAAGATGGAGTCACATCCTAA

>Modo-T2R3Bp

ATGCCATGTTAAGTGAATTTGGTCTTTGTTGTGACCTTCACTATGTTCTTTCTGGGTGCTTGGATAAATGGCTTCAT  
CGTATTGCTGCACGTATCACTTGGGTCAAGAAATGAAGAAATTTCTTTTCTGACTTCATCATTCTGAATCTGGCTCTCT  
CCAGGATCATCCTGCAAGGGACACCACTGGTGGATATTGTGTTAAAAAGATATGTTATCCCCATTTACGTCACAGAGGT  
TATATGTGAAATTTCTAGATATTTTCTGGTGGTTTACTAACAATTAAGCATCTGCCTGACCACCTGCCTCAGTGTCTC  
TACTGCCTGAAGATTGCCAATCTCCAACCAGACCTTCTCTGGCTCAAGAGGAGGGTTTCTCATGTGGTTGTCTGTAT  
TCTTGTGGGTCTGTGCTTATCTTCTTCCACATATTGTTACTGATTCTAAAAATACCACGTCTATTCTACCATGAATCAA  
TGATACTCTCAAGAAACCACTGAAGAAATCAAAAGAATAAAATGCACTATTTTCTTACATTTTCTTGGTACTCTC  
TGGTCAATCCTTCACTCTCCTGTCCCTGGTCTCCTCTGTCTGCTCATTCTCTCCCTGGTGAGACATACCAGGCAGAT  
GAAATATCATTCCATTGGCACCAGAGACCTCAGCACCATGGCCCATGTGAGAGCCACCAAGTCATCCTCTCTCTTTCA  
TACTCTTCATTGGATACCTCCTCGCCTTCTTTCTTGCCATGTCTTCTTATTTATTTCTAACCATCAAGATGTCAGAGATG  
ATTGCCTTACTGATTTTACAATTTATCCCTCTATTCAACCTTCACTCTAATCCTGGAAAATCAGAAGCTGAAGCAGGC  
ATTCCTCAGGATGTTCCAGGTCAAAAAGTGAGACTAAAATGTTAG

>Modo-T2R3Cp

AAACATACTGAGTTATTATATGTAATTGTGTTAAGTATTGAGTTTATCTGGGGCTTTTGGTGAATAGTTCCTTTGACCC  
AATGAATTGTATCAAATGAGTCAAGAACAAGCAAATTTCTTTGTCTGATTTTCATCTACTAACCTGGATTTCTCCAGAA  
TCTGCATACAATGGATTATCAAATTAATAGTATCTTACTGCTATTGTATCCCTATTTACATTATTAATTTTAAAAATACA  
AGAAATGTTTTTACTCTTTGTGCGATTTTTGGGCACTTGCTTTGTTGCCTGCTCAGTGTCTCTGCTGCCTTTTCCCC  
AGTCAATCTTCTCTGGCTAAAGTAGGTTTCTGCATGCTGTTGGGTTCCATAGTCTACTCCTTTAGTGAATATCACTGA  
TCTATAAGTTTAATATTTATCTGATCTAGGACAAATGAGACACAAAGTGATTTATCAAAATATGTGAGGAGAAAGGAA  
AAGAAATATCATGTCCCCACTTCTTGGTCTTCTTAGACACTGCTCCCTTTTGTGGGTTCTGATCTCTTCTCTCTT  
GCTCATTTTCTCCCTAAGGAGACCAATGAGGAGATGCAGCATCATGTAACCTGGCTCTAGACACTCAAACCCGAGGTTCA  
TGTGAAAACATCAAGGACATCCTCTCTTTCTTCTCTCTCACTTTAAAAATATTTTGTACTTTCTTCATTGTGAT  
ATTGAAGTATGTCTTCCAGACCAATAATGACTTAATTAATAAAGATTATTTAGCTATCTGTCTTCTGTGGACT  
CTTTCATCCTCATCCAGAGAAGGAAAACCTGAAACAGAAATCCTGAATCTACACAATGTGAAGAAATGCTATTTGCAA  
GGTCAAGCCAGCAAACCTTTTGACTCATAG

>Modo-T2R3D

ATGGTGAATTTAAGCCAACCTTGGGGTTTTATTTGTAGCCTCCACTGAATTGTTTCTGGGAACCTTGGCTAAATGGATTCAT  
TATGTTGTTGCATGTATCACTTGGGTCAAGACAGGAAATATCTTTGTCTGACTTCATCATCCTGAACCTGGCTCTCT  
CCAGATTCATCCTGCAGGGGATACCAATAATGGATATTATTTTACAAGTTTCTATCCCCATTTCCATGGCATAAGCATA  
TTTATGCGAATTATTGATATTTTCTGGGTGTTTGGCAATAATCTTAGCATCTGCCTGACCCTTGCCTCAGTGTCTTCTA  
CTGTCTGAAGATTGCCAATCTCTCCACCAAGCCTTCTCTGGCTCAAGTGGAGGGTTTCCATGTGGTTATCTGGAGTC  
TTCTGGGCTCTGTACCTTATTCCTTCTCAGCACACTGGCATTGATCCTGAAGTTTAAATGTTTATTCTAACCTCAATCAA  
ATAAACTCTTAGGAACTGCACTGAAGATGACAAAAGAAAGATAATTGGATATTTTGTCTGTATATACTTAGTGCCCT  
CTACTCAATCATTCCCTCTTCTGTCCCTGGTCTCCTTATTCTTCTCATCCTTTCCCTGGTGAGACATACCAGGCAGA  
TGCAACATCATGCCAGTGGCACCAGGATCTGAGCACCATGGCCCATGTGAGAGCCACCAAGCCATCCTATCATCTCTC  
TTGTTCTTATTTGGATACTTCTTGTCTTTTTTCTTGCTATGTCTAGTCATTTCTTGCCAGACCCCAAACCTGGCAGGAAC  
AACTAGCATACTGATTTTGTGCTAATCCCTCTATTCAAACCTTTGTTCTCATCCTGAAAACAGAAAGCTAAAGCAAG  
CATTCTCAGGATGTTCCAGGTCAAAAAGTGAGGTTGAAATGTTAG

>Modo-T2R3Ep

TTGGGATTGAATTTAAATCCCTGGTGACCATTAATATAATATATTAGTCTCAACCCCTAATTTAACCCCTAACAGTCTT

GGGAATTTTACCTAAATTTAATCTTAACAAGAGCAAGAAAATGTCTTTGTCTGAATTTATCATTACCAGCCTGGCTATTT  
CTAGGATTTGTTTCTCTGGGTATATAAATGATATTTTAAATGTTGCTCTATCCAGTTTTTCATGAAATAAGCATAAAT  
GCAAATATTTTCTACATTATGGATTTTGTCTAACTTCTTAAGCATCTGGCTGGTACCTGCTTGAAGTGGACTCTACTGCC  
TGAAGATTGCCAGTTTCTCCACCATGCCTTCTCTGGCTAAAGTGGGAGGCTTCCAGGTAGTTAAATGGATTCTGCTT  
GTATTTGTGCTCTTTTCTTTCTTTAGTACATTGTGAGTCAAGAAATTTGGGGCTACTTTTACTTAAAGACAAATAAT  
ACCCATAGCAAACTGCATTGGAAGACATTAGGAAAAAGAAAAGTGCTTTTTTTTTTTAAGTATGCCTTTATTTCCCTATG  
GATACCTATCCTTGATTCCCTATATTCTGATCATACTATTCTGGGAAGACACACCAACAGATGTAGGACAATGACAC  
TTGCTACGGTGACTCAAGCACCAAGGTTACGTGAGAGTGACCAAAATCATCTTCTCCTTCTTTTCTTTTATTGTAT  
TATTTTGTGCTCTTTTCTTTTATCATTATATTGAATTTTTACTGCCAGACCAATTTGGCATAGATGACTGGGAGAC  
AATTGCAACTGTCTACCTTCTATACACTCAATCATCTCTATTTTGGCAACAACAAGCTGAAATGGGCATTGCTGGGGA  
TGTTTCAGATAAAGAAGTAGGGGTAAAGGGTGAAGCAATGAACCTGCACCCAAAAGAAGAAAAAAGCATTGTTT

>Modo-T2R3F

ATGTCAAATTTAGAGGTAATGGTTATGTTTGTGGTCTCTATCGAGCTCTTTCTGGGAACCTCGCTAAATGGCTTCATTGT  
GTTGCTGCATTGTATCATTGGGTCAAGACCAGGAAAAATTTCTTTGTCTGACTTCATCATTCTGAATCTGGCTCTCCA  
GGATCATTCTGCTTGGGATAATGATGTTTGATACTGTTTATCCATATTCTATCCCATTACAAAACGTAGGCATATTG  
ATGCAAATTATTGATATTTCTGGATGTTTACCAATAACTTAATCATCTGCCTGACCACTTGCTCAGTGTCTCTACTG  
CCTGAAGATTGCCAACTTCTCCACCAAGCCTTCTCTGGCTCAAGTGGAGGGTTTCCCATGTGATTTGGGAATTTGGG  
GGGGCTCTGGGCTCTACTCCTTCTCAGCGCACTGGCAATGATTCTGAAATTTAGTGAATATGCTGACCTCAGTCAAATG  
AAACTCTCAGGAAATTACAGTGAAGAGGTCAAGAAAAAGCTAACTAATATTATGTTTTACATATTCTTGGTCTCCTCTG  
GTCAGTTATCTCTCTGTGTCTCTGCTTCTCTGCTCTTCTCTCTCTCTCTCTCTCTCTCTCTCTCTCTCTCTCTCTG  
AGCATCATGCCAATGGCACCAGGACCTCAGCACCATTGGCCATGTGAGAGCCACCAAGTCATCTCTCTCTCTCTCTCT  
CTCTCTCTCTCTCTCTCTCTCTCTCTCTCTCTCTCTCTCTCTCTCTCTCTCTCTCTCTCTCTCTCTCTCTCTCTCT  
TTGGAGACTGTTTTTATTGCTTATCCCTCTATTCAAACCTTTGTTCTAATCCTAGAGAACCAGGAGTAAACAAGCAT  
TCATCAAGATGTTCCAGGTCAAAAAGTGGAGGCTGAAATGTACGCCCTTGGGAACCTTCACCCAAGACTTGA

>Modo-T2R3G-partial

ATGACAAATTTTATATTAATAGTAGTTTTGTTGTGACCTCCATTATTTCTTTCTGGATGCTTGGATAAATGGCTCCAT  
TGTGTTGCTGCGCTGTATTACTTGGATCAGGACAGGAAAAATTTCTTTGTCTGACTTTATCATCCTGAATCTGGCTCTCT  
TCAGGGCCATCCTGCATGGGATACCATTGTTGGTTTCAGCTGTGACCATATTTTATCCCCAATTCGTCACCTGGATATA  
TTTTTGCATATTGTTGATATTTCTGGATGTTTACCAATAACGTAACATCTGTCTGACCACTGCCTCAGTGTCTCTCTA  
CTGCCTGAAGATTGCCAATTTCTCAACCAGGCCTTCTCTGGCTCAAGAGGAGAATATCTTGTGTTGTTGTCTGGATTCT  
TTGTGGGATCTCTGCTCTATTCTCTGCTTTCAGCACACTGTGAGGGTCTTGAATTCATTTTATTCTGACAAGAGTCAA  
ATGATATTCTCAAGAAACCACTGAAGAAATCAAAAGAATAAAAAATGCACTATTTTCTCTTGCAATTTCTTGGTACTCT  
CTGGTCACTCATTCCACTCTCCTTGTCCCTGGTCTCCTCTGCTCTCATTCTCTCCCTGGTGAGACATACCAGGCAGA  
TGAAGCATTATCCACTGGCACCAGGACCTCAGCACCATTGGCCATGTGAGAGCCACCAAGTCATCTCTCTCTCTCTCT  
ATGCTCTTCA

>Modo-T2R3H

ATGCAGAATTTAAGTGAACCTTGGTCTTTGTTGTGGCCTCCATTGAGTTCTTTCTGGGTTCTGGGTAAATGGCTTCAT  
TGTGTTGCTGCACTGCATCACTTGGGTCAAGAAATAAGAAAAATTTCTTTTCTGACTTCATCATTCTGAATCTGGCTCTCT  
CCAGGATCATCCTGCAAGGTATACCAATGGTGGGTGTTGTGTTAATGGTTTTTATCCCCATTTACATCACAGAGGTTTA  
TATGTGAAAATTCTAGATATTTTCTGTTGTTTACCAATAACTTAAGCATCTGCCTGACCACCTGCCTCAGTGTCTTCTA  
CTGCCTGAAGATTGCCATTTCTCAACCAGGCCTTCTCTGGCTCAAGTGGAGGGTTTTTCATGTGGTTGTCTGGATTCT  
TTGTGGGATCTGTGCTCTATTCTTTCACTATATTGACACTGATTTTAAATACCACATTTCTTCTGACATGAGTCAAATG  
AAACTCTCAGTAAATTACACTGAAGAAGTCAAAAGAATAAAAACTATTATATCTTGAATTTCTTGGTACTCTCTG  
GTCAATCCTTCCACTCTCCTGGTCCCTGGTCTCCTCTGCTCTCATTCTCTCCCTGGTGAGACATACCAGGCAGATGA  
AACATCATTCTATTGGCACCAGGACCTCAGCACCATTGGCCATGTGAGAGCCACCAAGTCATCCTTTCTTTCTTTAATA  
CTCTTCATTGGATACCACCTTGCCTTCTTTCTTGCCATGTCTACTTATTTCTTTCTAACCACCAAGATGTCAGAGATGAT  
TTGGTCACCGATTTTTGTAATTTATCCCTCTATTCAAACCTTCACTAATCCTGAAAAATCAGAAGCTGAAGCAGGCAT  
TCTTCAGGATGTTCCAGATCAAAAAGTGGAGACCAAAATGCTAG

>Modo-T2R3Ip

ATGCTAAGTTCAAGTTGCATAGTGGTTTTGTTTATAACCTTCATCGAGTTCTTTCTGGGAACCTGGGTAAATAGCTTCAT  
TGTGTTGCTGATCTGTATTATTTGGGTCAAGACCAGGAAAAATTTCTTTGTCTGACTTCATCCTCCTGAATCTGACTCTCC  
AGAATCATCTGCAAGGGTTACTATTGTTAGATTGTGTTTTATCCATGTTCTATCCTCATTATATGACTTAGGTATATT  
GCAGCAAAATTGGTGGCATTCTCTGGATGTTTATCAATAATTTAAACATGTGTCTGACCACCTGCCTCAGTGTCTCTACT  
GCCTGAAGATTGCCAATTTCTCCACCAAGGCCTTCTCTGGTTAAAGTGGAGTGTTCCTATGTGGTTGTCTAGATTCTT  
CTGGGCTCTGCTTACTCTTTCTGAACTCAATGTTTATTCTGGCTTCAAGTCAAATGAACTCTCAGGAACTGCACTGA  
AGTCATCAAAAGAAAGAGAATTGAGTGTATTATGTCATGATTTTCTTAGTGCTCTCTGTTCACTCTTCCCTCTCTTTT  
ATCGCTGCTCTCCACTGCTCCTGCTCATCTCTCTCTGGTGATACATACCAAGCAGATGCAGCATATGCCACTGGCCCCA  
GGGATCTAAGCACCATTGGCCATGTGAGAGCGACCAAGTCATCCTCTCATCTCTCTCTCTCTTAAATTGGATACTTTCTT  
GTCTTCTTTCTGCTATGCTAGTCATTCTTGTGACACCCAAAGTGGCAGGAAGAACTAGGACCATAATTTTGTCTGC  
TTATCCCTCTATTCAAGCCTTTATTGTAATCCTGGAGAACCAGAAGCTAAAGCAGGTATTTCTAGGATGTTCCAGGTCA  
AAAAATGGAGGCAGAAATGCAAGACTTTGGGAACCTTACCAAAAGCCTTGAGAAAAGAGCTGCACACTTTTTTACCTTA  
CGATTATATTCTTTTCATCATTTTCTCCATCTCTTTCTTT

>Modo-T2R3J

ATGATGAATTTAGCCAAAATTGTATATTTGGTGTGTTTCATCATTGAGTTTATTCTGGGTTTTTGTCTGAATAGTTTCAT  
AGGACTGGTGAATTGCATCAACTGCATAAAGAGCAAGAGAATGACTTCATCTGATCTAATTATTACAAGTCTAGCCCTGT

CCAGAATATGCTTGCTTTGGGTACCTATAGTTAACATTTTACAACACTCTATCCCAATTTATATGAGAAAAAGATATTA  
GGTATTATTGTCATAATCTGGATATTTATTAACCATTTAAGCACTGGGTTGGTCACCGGCTCAGTGTCCACTATTGCCT  
GAAGATTGCCAGATACTCCCACTCTGCCTTCTCTGGCTCAAGTGGAGAGTTTCTGTGTAGTTATCTGGATTCTGTCTGG  
GTTCTGTGCTTTTCTCTTTTTTAGTGTAGCACCAGTAATCAAAGAATTAATTGTTTCCTTTAGCAGCAGACAAATGAAA  
TTCATAGCAAACCTGCACTGAAAAATTACAAAAAGTTATGCATTTATTTTAGTGCTGTCTGGATGGTCATCCCTTTTGT  
GATAATTTCTGTGTTCACTCTCTCTACTTATTTCTCTCCCTGAGGAGACACACCCAGCAGATGAATAACAGTATCACTGGCT  
CCAGAGACCCAAACACTGAGGCACATTTAAAGCTGCCAGAATCATTGTCTCCTTCTCTTTCTACATATTATATTTT  
GTTGCCTTTTTATTCTTATATTGAGCGACTACCTGCCAGACTATAATTTAGCATTGATGATTGGGGAATGATTACAAC  
TGCCTATCCTTCTGCACATTCATTATCTCTATTTTGTAGCAACAACAACTGAAACAGGCATTCTGAGGATGTTCCAGA  
TACGGTGTGGGACTTGGGGGACTTGGTGACCTTTGCCTCACTGGTAAATCTGGAACAATAA

>Modo-T2R4

ATGCTTCTGCCCATTCTTTTTCTTTCATATTTCTTCATGATTGTTGCTCTAACTCAGCTCCTGACAGGAATTGTTGG  
AAATCTATTGATCATGATAGTCAATTGTAAGGCTTGGATCAAAAGTAGAAAACTTCTCCTTTGATAGGATCCTGTCTA  
GTCTCTCCATCACCAGATGCATAAGTCTGAGTCTAATGTTCTCTGCATTTAATTTTCAGCTTAATTTTCCAAAGAGCAAA  
TACCTGAGCTTATGGCCTTGATTATTTGAACTCTTGTTATTCTTGATTCTGCAGCCTCTGGATTGTGACCTTGCT  
CAACATCTTTTATTGTGTGAAGATTGCCAACCTCAACCATTTATTGTTTCTCTGGATAAAGCGAAATCTATCCTTGAAGA  
CACCTGGCCATTGCTAGCATGTCTACTGGTCCCATCATTTCAAATTTCTACAAATTTTGCTCAACAAAATCTTTGAG  
TTAGTTCATCCCACTCAGGAGAATGTGAGAAACAGCACCATGGTCAACATCAATGGCTCCATCTTCTTTGATGGCTCC  
TGTAATACTGAGCTTCAGCCTCCCGTTCATCATCAATTTGGTTTCTGTTCCCTGTTAATCTCTTCCCTGAGGAAGCACA  
TGCTGGAGATGCAGAAAAATGCCACCAGCTTTGGAACCTCAGACCAAAGCTCATGTAGGTGCTATGAAAGTTATGATA  
TATTTCTCATTCTCTATGTTCTTACTCCATTGCTCAACTGTTATCTTTCTCCTTCTTTGGGATTAGAAATAATTG  
GATCAGAAGCATATTGATAATAGTCAATTGACTTACTCTCAGGACATACTATTTTCATTATCCTATTGCATCCTAAAC  
TCAAAGCAAGAATAAAGAGCATTCTATGGTGCAATTGA

>Modo-T2R7A

ATGCCAAATGCAATGAAGACCATCTTTATGATCATGATTATTGGATTGTTTCATGATGGGGATTTTGGGAATGGATTGAT  
TGGACTGGTGAATTTCACTGACTGGGTTAAGAGAAGGAAAACTACTTGGTTGATTTCACTTTACCGGTTTAGCCATCA  
CCAGAATTGGTTTGTGTTCTCGTTGCTACTAAATGGATTTTTAGTGGTTTTTACCAGAGATATATGAGTATGCTAAT  
ATAATGAGAATTATGGATAAATCTGGACAATTTCCAACATTTAAGTGTCTGGTTTGTACATGCCTCAGTATATTTCTA  
CTGCTTGAAGATAGCCAATTTCTCCCACTTTCTTTCTCTGTTGAAATGGAGAATTAACAGAGTGATTCCCATATTTCT  
TACTGGCATCGTTGTTTCTGTTCTGATTCTTAATTTCCAATAATAGAGAAATTAATGAGGATTTGAGGAGCCTGGTA  
AGCAGGAGGAACAAGAGAAATACCTCAATCTCAATAATGATAAATTTACATACTTTAACTCTGGTTTTCTCTCAATCT  
GGGAATCTCTTTTCCCTTACTGTGTCCCTGATCTCATTTTCTCTGTTAATTTCTTTCCATGTGGAGACATACCAGGAAGA  
TAAAGCTCAATGCCATGAATGGTAGAGATCCAGTACAGAGATCCATCTGAGAGCCATGAAAGCTATAATCTCTTCTCTC  
ATCCTCTTTATCATTTACTGTTTGGCCTTTCTCATAGCCACATCCAGCTACTTTTCCAGAGAGTGAAGTAGCAATGAT  
ATTTGGTGAGATAATTGCAGTCACTACCCCTCAGGCCACTCATTTATCCTGATTTTGGGGAACATCAAGCTGAGGCAGA  
CATCCTTGAGTGACTACAGCAAATGAAAAATTGTCTCAAAGGAAGAAATCCTTAG

>Modo-T2R7B

ATGTTAAATGCATTGAAGACCATCTTTATAATTTTATGCTTGGAGAGTTCATAATGGGGTTCTGGGAATGGATTGAT  
TGGACTGGTGAATTTCACTGACTGGATCAAGAAAAGGAAAACTACTTAGTTGATTTAATTTCTACCAGTTTAGCCATTT  
CCAGAATTAGTCTGTTTGTGATAATGATGATAGATGGCCTTGAGGGGTGTTTTTCCAGAAAGATATACCAAGAGAAAG  
TTCACAAGAATTTAGATGGCTTCTGGACAATTTCCAACCTTTTAAATGTCTGGTTTGTACTTGCCTTAGCACGTTTTA  
CTGCTTGAAGATAGCCAGCTTCTCCCATCTCTTTTCTCTGGCTGAAGTTGAGAATTAACAGAGTGATTCCCGTAATTC  
TACTGGCATCTATATTCTTTCTGTGTTCACTAGCCTTCCAATAACAGAGATTTAATGAAGATGTGAGGAGCCAGATA  
AACAAAAACATAAGGAAAAATACACTTCATTTCTCAAAATGAGTAAAGGTGAATATGTTGCCACCCCACTCTCCTTAA  
TCTTGGGCTTCTCTTCCCTTACTGTGTCTCTGATCTCATTTTCTGTTAATTTCTTCCATGTGGAACATACCCGGA  
AGATAAACTCAATGCCGTGGATACCAGAGATGCCAGCACAGAGATCCATTTGAGAGCCATGAAAGCTGTGATCTCTTTC  
CTCATCCTCTTTGTCAATTTACTGTTTGGCCATTCTCATAGCAACCTTTAGCTATGTTTTCCAGACCAGAATCTAGCAAT  
GATATGTGGGAGATAACTGCAGTCACTACCCAGCTGCGCACTCATTTATCCTGATTTTGGGAAACATCAAGCTTAGGA  
GGATATCCTGAATGCACTACAACAGCGCAGCATTGTCTCAAAGGAGGAAATCCTTAGTGCCCTAG

>Modo-T2R7Cp

ATGTACAATGCAATGAAGACCTTCTTCACAATCACAATAATTGGAGAGTTCATAATGGGAATTTTGGGAATGGATTGAT  
TGGACTGGTGAATTTCACTGACTGGATCAAGAAAAGGAAAACTACTTAGTTGATTTAATTTCTACCAGCTTAGCCATTT  
CCAGAATTAGCCTGTTATTTATAATAATGCTAGATGGCCTTATATTGGTGTTTTTCCAGATGAATATGCCAAGAGTACG  
TTCACGAAAATTATAGATGGCTTGTGGACAATTACCAATCATTTAAGTGTCTGGTTTGTACCTGCCTTAGCATGTTTTA  
CTGCTTGAAGATAGCCAATTTTCCACCTCTTTTCTTGGCTGAAGTTGAGAATTAACAGATTGATTCTTATAATTTCT  
TACTGGCATCCATATTCTGTTCTGTTAATTGTCTTCCAATAACAGAGAACTTAATGAAGATTTGAGGGCCAGATA  
AACATAAAGAACAAAGAGAAATAATGATTGAAGTTAAAGTGAGTAAATCTGAATACTTTTGGGATCCATTTTTCTCAA  
TCTGACAACCTCTTGTCCCTTACTGTATCCCTGATCTCATTTTCTGTTAATTTCTTCCATGTGGAACATACCAGGA  
AGATAAACTCAGTGCTATGGATGCTAGAGATCCAGCACAGAGATCCATTTGAGAGCCATGAAAGCTGTAATCTCTTTC  
CTCATCCTCTTTGTTATTTATTGTTTGGCCTTTCTCATAGCCACATCCAGCTACTTTTCCAGAGAGTGAAGTAGCAGT  
GATATTTGGTGAGATAATTTAGCCATCTACCCCTCAGGACACTCATTTATCCTGATTTTGGGGAATATCAAACCTGAGG  
CGGACATCCCTGAATGCACTACAGCAAATGAAGCATTGTCTCAAAGGAGAGAAATCCCTTGTGCCTAG

>Modo-T2R21

ATGTGTGTGACTATGGCATCTGGAGAATTCCTAGCAGGAGTTTTGGTCAATGGTTTCATTGGAATGGTAACTTCATAGA  
CTGCATCAAGACCAGAAGAATCTCTACTTGAATCTTATCTTCATTGGCTTAGCCGTCTCCAGAATTGGTCTGTTAGGAA

TTTTGACATCACAAATCTTTTTCTCTCATTCCATCCATTATGTTTTGAGATCAACTGGAGATATTTTAAATATGCTTTGG  
ATTTTGGCCAATACTTCTAGTTCCTGTTCTCTGCCTTTCTCAGTATCTTCTACTTTCTGAAAATTGCCAACTTTACCCA  
TCCTATCTTCTCTGGCTGAAGTGGAGGGTAAATAGAGGAGTCTTCAGGATGCTCTTTGGCTGCTATTTTCTTTCTTTT  
TCATTTTCTTTTGTATCATTGTAAAGTATGCTTTAGAAGTTACTTTTGATCTAGAAAACAACAGAACTTGTACAG  
GAGATCCAAAACTAAAACTTCTTTTTTCTTCAATGATACTCTTCAGTATTGGTGGTCTTATCCCTTTTGCTATGTC  
CCTGATCTCCTGTTTCTCTCTAGTCCGTGCACTTTGGAGGCACACTTTGAAGATGCAACTCAGTATCACAGGCTCCAAAG  
ACCCTAGCATGGAGGCACATATAAAGGCCATGAAATCCATGGTCTCTTCTCTCTCTTTGTTCTGTATTATGTATGC  
ATGTTCTTACTAGTCACAATAATCCAGTGACGAAGAGGACACAGTCTGTACTGCTTATTTGATAACTATGATCAAGTA  
TCCCTTGGTCCACTCCATTATCCTTATTTTGGGACACAACAAGCTAAAACCCACTGCCCTGAGGGTGCTTTGGAAGCTCA  
GGATCTGTTTCAAGTGTTCTGAAAAGGATGA

>Modo-T2R22

ATGTCAAATGCAGTGGAGAAAATGTATGTGGCTGTAGCATGTGGAGAGGTCTACTTGGAATTATGGCAAATGGCTTCAT  
TGGAGTCATGAAGTGCATTGACTGTGTCAAGACCAGAAAAGTTTCTACTTAAATTTTATTCTTACTGGCTTAGCCATCT  
CCAGAATTGGTCTGCTAGGAATCATCACATCACATGCTCTTTGCCATCTCATTCTATCCTTCTCTGTAATTTGTTAGGCAAC  
ATGAAAACTCCAATGCGTTATGGAGTTTGGCCAACAATTCAGTACCTGGTTTTCTGCCTGCCTTAGTGCTTTTACTT  
GCTGAAAATTGCCAATTCTCCCATCCCATCTTCTCTGGCTGAAGTGGAGGATAACAAGGGAGTCTCAAGGTGCTTC  
TAGGTTGCTATTTCTCTCCTTTCTTCTTCCCTTATGGTAACATTGATGAGTGATGCTTAGAAGTAACTGTTAATTTA  
GAAAGCAAATAAATTGACTCAGAAGATACAAGTACATAAAAAACCAATTTTGTGTTATGATGATGTTTCAAGTGTGGG  
GGGAATCTTGCTTTTGTCTGTCTGATCTCCTGTTTCTGCTGGTCTATCACTATGGAGGCACACTCAGCAGATGC  
AACTTAATGCCACAGGTTCCAGAGATCCTAGCATAGAGGCTCATGTGAGGGCCATGAAATCCATGGTCTCTTCTCTTC  
CTCTTTGTTGGGTACTATGTAGGCATGTTCTCAATAATCACAAATGGCTCGATATTAGAAAGGAAGACGTCTGTAAGTT  
TACTTTGATGGCTATGATCATGTACCCATTGGCCCACTCCATTATCATTATTGTTGGACACAACAACTAAGACTCACTG  
CTCTAAGGGTGCTATGGAAGTTCAGAGTCTATTTCAAGTGCTTTGAAAAATGCTGA

>Modo-T2R23

ATGTTAGAAAATGGGAGATCTTAATGGTTCTGATAACTAGTGAATTTCTATTGGGTGTTCTGCTGAATGGATTTATAGT  
AGTGGTGAATGCACCGACTGGATCAGGCACAAGAACTGTTAACAAGTATCTATCCTGGTTGGCTGGCTATCTCCA  
GAATTGGACTATTATGCACGATGATGTGGACTGCCTATTTATTTGTAATGGTCTTATGCAAGTATCGCAGATAGAGTC  
AGAGTAATTGACGTCTTCTTGGTGCTGACACACAGTTCAAGTATTTGGTTTGGCACTGTCTCTCAGCATCTTCTACTTCT  
AAAGATTGCTAACTTCTTAATCCCTTCTTCTCTGGATGAAATGGAGAATTAACAGGATCATCTACATGCTTCTTGGAG  
GACCTTGGTAATTTCTTTGCTTTTGTCTTCCAATGATGGAGAGAATGTATTACTATGCTGACCACTTTTCAAGAGAA  
AGAGAGAGAAATGTTTCTCAGGAGGTCCAAGAGAAATAAAGCTCATCATGTTCCAGATTCTTACCTTGGCTGGG  
TCTTATCCCTTTTGTCTGACTCTAGTCTCATTATCCTTATTCTCTCCTATGGAGGCATACCCAGCAGATGCAAC  
TGAATGCCACTGTTCCAGGGACCTAATACAGAGGCCCATGTTGAGCCATGAAAACATGTCTTCTGTTCTCTATTCTC  
TTTTTATTGTACCATATAGGTTTTCTTCAACTACTGGACTTACTTACTGGGTACGAGCAAGATGTTTTCTTATTGAA  
TATATCAATCATGTTTCTATCCCTTTGGCCACTCACTGATCCTGATTCTGTGGAATAGCAAGCTAAGGAAGGCTGTCC  
TGAAGTTGTGGTGAAGATAAGGTGCTACCAGCAAGGAAGTCATCCTCAAGTCTGTGGACAATTTGGCATTCTTGAGG  
GGACTGAAGTCACGATGGAGTCTTAA

>Modo-T2R24

ATGCAAAATCATGTAGAGAAAATCTTGTGGTTCTGATAATTGGAGAGTTTGTAAACAGGGGTTCTAGGGAATGGATTCAT  
GGTATTGGTGAATTGCATTGACTGGGTCAAGAGTAAGAACTATCAACTGTTGATCTCATCTGTTGCTGCTGGCATCT  
CCAGAATTGGTCTATTGTGCTTGATTAATGGGATAGTTTTCTATTCTTATTCTTTTGGATCAAACAGATGATGAGCAT  
CAAAATTTTATTAGAGATTTATTTGGATAATTACCCACCTTTCTAGTGTGTTGGTTGCTACCTCACTCAGCATTTTCTA  
CTTACTAAAGATTGCCAATTCTCCCATCTTTCTTTTGTGGCTGAAGTGGAGAATCAATCAAGTGGTCTACATACTCT  
TGGTGGGGCCCTATTTGTCTATGTATCCTATCAATCCATAAAGTTAGTGGAACTTTACTCTGATAGGACCCTTAGTAGA  
AGAGAGAATGAGAGAAATGAATCTCAAGCGGTCCAAATGAATAGAAAGCATTACTTTATTGAAGAGGTGGGAATAAATAT  
TCTAAATATCTCTCTTCTATCCTTTCTATCATATCTTGTCTGCTACTATACTCTTATGGAAGCATTCCAGAAGA  
TGCAGCTCAAAGTCAAGACCTCCAGAGATCCAGCACAGAGGCCACAAAAGAGCAATGAAAGCCATGCTTTCTTCTCTT  
ATCCTTATAATAGTTTATCATATCGGCATCCTCTTCACTCAAGAAGCTTCTCGAAGCTAACTTCCATGTTTGGTATGGC  
ACTAATGTCCCTTTATCCACAGGACATTCACTGATATTGATTCTATGGAATAGCAAGTTAAAACATGCTGCGCTATTGG  
TGTGGAGGCAGCTGAAATGCTGTCTGAAATTAATAAATCTCCAATGTCTAG

>Modo-T2R25

ATGCCAAGTGGCGGGGACAATATTTTGTGGTTCTGGTAGTTGGACAGTTCTTAATGGGGATTCTGGGGAACGGATTCAT  
GATATTGGTGAATGGCATTGATTGGATCAAGAGCAAGAAATTGGCAACAGGGGATATCATCTTGGTAAGCTTGGCCATCT  
CTAGAATTGGTATGTTAAGCACATTAACATGTGTTAGCTTTCAATTAGTGTTAATCCAGACGAATTACTAAATGAGGGA  
ATTAATGTCAGTGAAGTTTTCTGGATCCTGACCTACCTTTCAAGTATTTGGTTTGGCACCTGTCTCAGTGTCTTCTACTT  
CCTAAAGATTGCCAATTCTCCACTCCCTCTTCTCTGGCTGAAGTGGAGAATCAACCAGCTTGTGCTGTGCTAATGG  
TGGGACCTTGGCTTTTATGATGACCATCAATCTTCCAATGTTGGAGAGAGCTTATAACAATGCTCTTATTAGAAAGAAC  
AACACAAAAGTATACAGAGACTACCAGGTGAATGAGAGTGAATATATACCATACAAATGTTACCAACCTCTCGAGTCT  
CATCCCTTGTCTTCTATCTCTGGTCTCATTCTTGTCTCTTGTCTTCTCTCGGAGACATATGCATCAGATGAAGCACA  
GTGCCACCGATCTAGGATCCAGCATGGAGGCCCATGTTGAGCCATAAAAGCCATACTCTCTTCTCATCTTTGTT  
GTACTCTTCTTTTGGGATCATTATCATCTTGTGGAACCTCTCAATCCAGGAAAAGACTCAAAATTTAAGGTGTGGAAT  
ACCATTGATGTGCTCTGTCCCTCAGGTACACACTAATCCTGATTCTGCACAATAGCAAGCTGAGACAGGCAGCTTTGA  
AGGTGTGGTGGCAGGTGAGAGACTGCCTGAAAGGAAGCAATGA

>Modo-T2R26

ATTCAAGATCCCATAATGAAAATCTGTGTGATGCTGGCAGCTACAGAGTTTCTAGTGGGAGGGTTGGCCAATGGCTTCAT

TGGACTGGTCAACTTCATAGACTGGGTCAAGACTCGAAGAGTGATTCAATAGACTTAATCCTCACTGTATTGGCCATCT  
CTAGGATTACTTTCTTGGGATCATTCTATCTATAATCATAATGAATTTCTATTTAAATTTATATGCCACTGGTAAGGCG  
AGCTACCTAGAACCTCTTTGGAACCTTGAGCAACCATGTAAGTTCCTGGTTTGGCACCTGCCTCAGCATCTTCTACTTCCT  
GAAGATCGCCAACTTTTCCACCCTGCCTTCTCTGGCTGAAGTGGAGGATTAACAGGGTGATTCTCAGTATAATGATTA  
TCAGTTCCTCATTCGCTTGTCTCAATCTTCCATTGACAGTGAATAATCAGATTTATATAATCCTTGCTGAGCAT  
AAAAATAAGCAAAATGGAACCTATAAGATGAAGATAAAATAAAGCCACATCCTTTTCTATTTGGTTTTCTACCACATGGA  
GGGATTTGTTCCCTTCGGTGTCTCTGTTATCTCTGCCTTTTGTAGTCTTCTCCCTGTGGAGGCATACCCAGCAGATCA  
CAGCCTCCAGAGACTTCAGCACAAAGGTGCATAAGAAGACCATGAAATCCATGGTGTCTTTGTCTTCTCTATTTAATA  
TACCATTGGGCATCATCATGCCAAATCTGAGCTACGGGTTTTTGAAGTACTCTACCTGTGTTTTATCAATGTTAAT  
AGCTACCACCTACCCCTTGGCCATTCCATTATTTAATCAAGGAGAATAACAAGCTTAGGCAGGCCTTCTGAGCATTC  
TATGGCAGCTTAAACACTGCCTCTAA

>Modo-T2R27

ATGCCAAGTGTACTTGAGAGCATCTGTATGATTGTGGTCTTTGGACAGTTCCTAGTCGGGGTTTTTGCCAATGGCTTCAT  
TGGATTGGTAAACTGTATTGAGTGGGTGAAGACCAGAAGAGTGACCCCAATTGATTTCATCCTTACTGGCTTGGCCATCG  
CCAGGATTGGTACATTGTGGGCACTAATGATAATGACCTTTTTTGTCTTCTCTATTTAAGAGAAATTCATTAATAAT  
TGGACTCACTCAGAAGTTATTTGGAACATCAGCAACCATCAAGTGCCTGGTTTGAACCTGCCTCAGTATCTTCTACTT  
TCTGAAGATTGCAAAATTTCTCCACCCTGCCTTCTCTGGCTGAAGTGGAGAATTAACAAGGTAGTCTCAGGATGCTGA  
TGGGGTGCTTACTCATATCCTTGGTCATTATCCTTCCAGTGATGGAGAGAATCACTAAGATGCAACTGATTCCAGTGGT  
CAGGAAAATGGAATAAATATTAGTTATAATGTCCAAAGATTGAAAACCTACAATTTTCTGCCTCAATTCCTTTAAATAC  
TGGTGGTTTGATCCCTTTGCTCTATCTGTCGTCTCCTGTTTCTGTAGTACTGTCACTGTGGAGGCATACACGGAAGA  
TGCACCTCAAAGTCATAGGCTCCAGGGATCCCAACAGAGGCCCATGTGAGGGCCATGAAATGCATGATCTCTTCTCTC  
TTTCTTTTGTGTATATCATTTGGGCCTCGCCATTGGAGTCTTAAACGTTTTATATTCCATTGTAACTTCTTGCCAT  
ACTTTCAGCGATTATCATGAATGTCTATCCCATGACCCACTCCATCATCTAATACTGGGCCATAGCAAGCTGAGGCAGG  
CCTTTCTGAGGGGACTGAGGAACTGCCTCAACATCCCTGGGGAAGTCTAAGTGGCAGAGGCTAA

>Modo-T2R28

ATGGAGAACATCTGTGTCACTGTGGCATCTGGAGAACTCTCCATTGGAGTTTTGGCTAACATCTTCATTGGTGTGGTGAA  
CTACTTGAACCTGGCTCAAGACCAGGAAAGTGTCCCACTGGACTTCATCCTTACAGGCTTGGCCATATCCAGGATCATTC  
TTCTGTGGACAATAGCATCTATGATTATTTATTGGGTCACTATTTCAAGAATAACCTTGAAATTAGACTGAGATTTTGG  
AAGCTTCTATGGTACCTATGCAGTCTGTCAAGTGCCTGGTTTGATGCTTCCCTCAACATCTTCTGTTTCTGAAAATCGC  
CAGTTTCTCCACCCTGTCTTTCTTTGGCTGAAGTGGAGAGTTGATAAGTTGGTCTTCAGGATGCTGATGGGGTGCTTGA  
TTATTTCTTTGTCTCATTTTACTTTCACCTGGTAGAAAAATCACTTCCAATTTTCTTTTATAAAAGAAATAAAGCAACATA  
ACTGAAATGATTCAAATAGATAGCATCAACCTTTTACTTTCTACAGTATTCTTTTATATGGGGAATCTCCTCCCTTTTAC  
TCTATGTCTGATTCTTGTCTTCTACTAGTCTATCACTATGGAGACACACCCAAAAGATGCAGCTCAATTTAGAGACT  
CCAGAGACCAAGCACACAAGCACATATAAAGCCATGAAATTCACATCTCCTTCTCTCCTCTTTGTACTATACCAT  
GTGGCGATCATCATAGCAGTTTAAAGTTTTATTCTATTTGACAGTAATCTGATTATAATGTTTGCAATGATAACCATGTC  
CATCTATCCTTTGGTCCACTCCATAATTCTGATCCTGGAGAATAGCAAGCTGAGGCAGGCCTTACTGAAGGCATTTTGG  
AACTCAGATGCTACCTCAGAAACTCTGGCAGACTCTTGGGAACATGA

>Modo-T2R29

ATGCCAAATAGTGGGGAACCATCTCAATTGTTCTGGTAACTGGTGAATTTCTATTGGGCATTCTGGTGAATGGATTAT  
AGCAATGGTGAACAGTACCGACTGGGTGAGGAGCAAGAACTGTTAACAAGTGACATCATCTGGTCAGCCTGGCTATCT  
CCAGAATTGGACTTGTGAGTATTATAACGTGGAAGAGCTATTTGGTTATGAATGATATTATGTATTCTCTCGATGGA  
GTTTTAAGAACAATTGATATCTTCTGGTACTGACTCATAGTTCAAGTATTTGGTTTGGCACTGTCTCAGCATTTTCTA  
TTTCTTAAAGATTGCTAAATCTCTAATCCCTTCTCTCTGGATGAAATGGAGAATTGACAGGATGATCTACATGCTTC  
TTGGAGGGCCTTTGATAGTTTATTTGTTCTATCTTTTCAGTGATGAAGACAATGTATTGCTACAGTAGCAGCTTCCTT  
TTTAGCAATAAAAAGGGAATGATTCCAGGAGTCCAAGTGAATGAACCTTTGTTTCATCATATTTCCAGCTTTTCTTTGG  
TTTTCTGAGTTTTATCCCTTTTACTCTGACATTATTTCTATTCTCTCTACTATTCTCTCCCTGTGGAGGCATACCTGTC  
AGATGCCAACTCAATGCCACGGTTCCAGAGACCTAAAAATAGAGGCCATGTCCGAGCCATGAAAGCTGTGTCTTCTTCT  
ATCCTCCTCTTTTATTGATGATATAGGTTTATGTTTCACTATGGGAGTACCTGACAAATAGTAAGGTGTTTTTCTT  
GCTGAGTATGTCAGTCATGTTGTCTATCCCTTGGTCACTCACTGATCCTGATTCTGTGGAACAGCAAGTTGAAGAAG  
TTGCCCTGAGGGTATGGTGAAGATGAGGTGCTACCAGAAAGGAATCATTTGTAA

>Modo-T2R30p

ATGCCAAAAACAATGGAGAACATCTGTATGACTAAGGCATTGAGTCACTTTAGGGGTATATTTTGGCAATGACTTCATTG  
GATTGATCAATTGTATCGACTGGATCAAGATAAGAAGATGGTCTACTTTGGACTTCATCTCTGCTGGCATGGCAATCTTT  
AAGACTGCTCTAGTGGAGTTATGTGTAGTAATTTTCTATACTCTATCCTAAATGACACGACCCTGGCAAAATGAGACAT  
GTGGATGCCATTTGGTACCTGAGCAGTGATTCAAGTGGCTGGTTTTTCTCTGATCCAGTTTTTTTCTACCTCCTAAAAA  
CTGCCAACTTCTCCAATCTACCTTCTCTGGCTGAAAGGAAGAAAAATGATCGACTGTTTGTCTATTCTGCACT  
AATTAGGCTTCCACTTATAGAGAAAAAAGTAATAATTATGGTTTTCAAGCTCATCAAGAAAAACAAAACACGAATA  
AAAAGAATCAGATAATTATCACAGCCCCCTCCATCCTTTTCTATATGAATAATGTTTTCTCTGCCTGTCCCTGACTAA  
GTTTCTGTAAATCTTTCTAGAGAGGCACACCAACAGCTGCACCATAATGTTTCGAGGCTCTAGAAATCTCCACAA  
AGAAGTCCACTTGAAGGCCACAAAATCAGTTGCCTCTTCTCTTGTACAGAACCATCATGAAATTGTCTATAAGAA  
TATGAAGCTACGCCATATTTAATAAAGGTGGATTGAGTGTACCTGGATGGTATGGCTATCTTATAGTACTTGGCC  
CACTCCATTCTCTGATCCTGGAGAACGCAAGGTGATACCTCCCTCCATGAGGAAGTGA

>Modo-T2R31p

ATGTCAAATACAAAGGAGGAAATTTTGTGGTCTTGGTAGTCGGAGAGTTTCTAATGGGGATTCTCATGTATCCTTTTTG  
GCATTGGTGAGCCGAATTGACTGGGCCAAGAACAAAAATATCTCAGCAGTTGATCTTCTCTCTGGTCAGCTTTGGCAT

GTCTTGATCATTCTGTTATGCACAATGAAATAAGATAGATTTCAAATCATGCTCTGGACACTAAAGATGGTTGATCTCT  
TTTGGATAATGGCCCCACTATTCAAGTGTTTGGTTCACTACCTGCTTAGCATCTTCTACTTATCAATGATCACCAACTT  
CTCCCATTCTTGTCTCTGGTAAATTTGGAGAATCAACAAAGTAGTCTTCATAATCTTAGTTGGACCTTTGGTCATTT  
CCTGATCCACTAGTTTTCTATTATAGCTGAGAGCTTATTATTATTATAGAATCTTTATTAAGTGAGAGAAATGCTTA  
CCAAGAGATTGAAAGGAGTACAAGTAAACACATTATTGTCCAGATTTTCTTGGTTTGTGAGTCGGATCCCTTTTCATTT  
GGTCCATATTCTCTTGTCTTCTGATAGTCCTGCCCTGTGGAGACTCACTTGAAAACGAAGTTGAATGTCACAGGCACC  
AGAGACCCAAACACAGAGGCCCATGTGAGAATGAAGACAGTGAATGAAGAATGAAAGAATGAAGAATGAGGAAAGAAAGA  
AGATGAAGACAGTGATCTTCTTATCATCTCTTATACTGTACTTTGGGGGCTCCCTTCTCATCATCAAGAGCTACTCT  
TCATCTGTTATTAGGTAAGGCAATTTTGTCCCTCAATCCTTCAAGTAACTCATTGAACCTGATTCTAAGAAAGGCCACCC  
TGAGGGTTCTGAGGCAGGTGAAGCGACCCCTTGACGTGAAATAA

>Modo-T2R32p

CCAAGGGTGTGGAGAGCACATATGTGACTATGGCTGCTAGAGAGTTCTTAGTGAGGTCTTTGACCATTGGCTCCATTGT  
TTTGGTGAAGTGCATAAATTGGATGAAGATCAAAAGAATGTTCACTGGGGATTTCTTCTCATTGGCTTGATCATCTCTA  
GGTAGTGGAACACTAGTGATGAACACTAAGAGTAGGCATTTTGTAAATTGAGTTCTATCCTGGATGTTATGTCCTTGCTAA  
ACTGAGGTATTTGGGGGCTCATGGCACTTGAGTAGTCATATGAGGGCTGTTTTCCACTTCTCCAGAATTTTCTACT  
TTCTAAAGATTACAATCTTCTTCTCACTCTGGCTTCTTAGCTAAAGAGGAGAATTATTGAGGGAGTCTTAGGATGCTA  
CTGGGTGATGGTTCATCAACTTGTTAATTGATCTTCAATGGAAGGAAAGCAAAATGATTCCACAATCCATATTGATCT  
AGAAAAAAGACAATCATGACCCAGAAGGTCCAGTAAGTTAAGACCAAAATTTTCTATCTTGATTCTTTTCAATAGGGA  
GTTATGTGTGTGACATGTGCACATGAGACTTTGCACTAATAAGCTTTTAAAGGGAGACAAAAATAGAGACAGTGATGCA  
CATGATGATAGACAAAGCCTAAGAGGGCCAGAAGTTGACTACCATGATGCCACTGTCTTTTTTTTTTACCTTGATTTTC  
CTTCTCATTCTTTAAAAAAGTCTTGTGACTTTTCGTTTTTTTTTTTTCATTAACCTTTCATATCACAATGGATAAAATC  
AATGCCTAGAACAGGATCTTGACACAGAAAGGCATTATAAATGGTAATTTATTGTTTGAATGCAGGCACATATATGT  
ACTGATTGTGTTTGTGGAAGCAAAACATGTCTTGTCTCTTTTCTCCTTCTTGCACTTAAAAAATTAATAATTAATCTAAA  
TAACAAAAATATTATATTTTAAAGATTTATTAAGATAATTAGAAATAAAGGAATAAAAGGATACAAAGTAAACCA  
TGTGCCCATGGCTCATCAACCTATTACATACACACCCATGCTTACCACCACCACCATG

>Modo-T2R38

ATGGCCCTCTGGCCCTAGCCATCACAGTGTCTATGAAGCTAAGTGGATATATTTTCCCTCTCAATCCTGGAAGTGGC  
AATAGGGATTCTTAGCAATGCGTTTCATTGTGTTGGTGAATGCTGGGATCTAGTGAGGAGGCACCAAGTGTCCAAATTTG  
ACTCTGTCTGCTATGCCTTGGCGCCTCTCGGATCTTCTACAGATTTTGTCTTTATGGATGCTCTTACCTCACCCAT  
TTTCAAGTGATGAGGGACCCACTGAGCATCAAGTACAAAACGTCATCTTATTTGGGATGCTTGTCAACCAACCAAGCCT  
CTGGCTTGCCACCTGGCTTAGCATTCTCTACTGTGCAAGAATTGCCGAGTCTCTATGCCTTTCTAATATGGCTTAAAG  
GCTGGCTCCTCATGACCATCCCCAGCTGTTACTAGGTTCCCTGATTTTCCCTTGGCTCAGTTTCTTTCTTGTATATGG  
AAACATTTTAGTTTATCTACTCAACTCTACAGTTTCTTCTGGAACATCACAGAGAATAGCATAAAGGAGAGATT  
CATTTTTTCCATTTCTTCTTCTTGTCAATTTGGGCAATATCTTCCCTTCTGCTCTTCTGCGATCTTCCAGCATCC  
TTATCATCTCCTTAGGAAGACATGAGGACAATGACAGCTCAGACTACTGGCTCTGGAGACCCAGCCTGGAGGCTCAC  
ATCATTGGCCCTCAGTGCTTGATTTCTTCTTTTGTCTATGTAATAGGTTTTGTAGCTACCCTAGCGGCAGTCCCTT  
CACCTTACTTATTTCCAGCAAGATTGGGGTGATGGTATGTGTGGGATAATGCTCACTTCTCCCTCAGTACACTCGATCA  
TTCTGATCCTCAGCAACAACAAGCTGAAAAGAGTTCTCAAAGCATTCTGTACTGGCTTCGGTACTTTCTAAGGCATGC  
ATAGTATAA

>Modo-T2R39

ATGTGTGAAATCTGCAGTCTCCAGAGAAGAGCCCTCAATGTTTGTATTATCATATCTTCTACTATTTTCAGGAACAGA  
GTGCATCATTGGCATTACTGGGAATGGTTTCATTATGGCTATCAATGGGACTGAGTGGGTTGAGAACAGAAAGTTCTCCA  
CAAGTGGTAGGATTTTGTCTTCTCAGTTTGTCTAGAATTGCTCTCCAGACCCGCATGATGATAGAAAATTTGCTCT  
TTAATATTCTATCTTTTACAAAGAAGACACTATCTATGAACATTAGAGTCATTTTCATGTTCTTGACTTTTTCAG  
CCTCTGGTTTGCTACTTGGCTTAGCATTTTCTATTTGTAAAGATTGCTAATTTCAACAACCCCTGTTCTCTCAACTAA  
AGTGGAGAATCACCAGATTGATGCCCTGGCTATTGTTGTATCAGTGATCATTTCTTCTGCAACAGTGCTCTTTTCT  
CTGCATGTTTACAATGCATCTGCACTGACTTAATCCTCAATCATTCTCCAACCTCCACAAGAAGAAATACAACATTAA  
TACCAATATGATTAACTTGGTTGTTATCTACAATGTAGGAATGTTATCCCTCTCATCATGTTTCTGAGCCCTCT  
CATTGATCATTTCTCTCAAAAGACACCCCTGCAGATGGAGATTAATACCATAGGCTCCAGGAATCCAGTATGGAGGCT  
CACATGGGAGCCATCAAGCCATAAGTTCTTCTCATTCTCTACATTTTCAATTTTGTGCTTGTCTCTCTCATGTC  
TAACATTTTGTGATGAAAACAGTTTCTGGAATATATCTGCAAAATCATTATGGCTGCCTATCCTTCTGGTCACTCAATAT  
TATTAATCTTGGGAATCCAAACTAAGGAATGCATGGGAACGTTTTCAGCACCAATGAAATCTGCCTAAAAGGGAGG  
ACTTCTAA

>Modo-T2R40

ATGGCAAAAGTGACTACTGATTCCACAATGATGATATATCTGAATCTGTCCTTTTGATCACCTTAATAGTGCCAGGAAT  
TGAGTGATCACAGGCATGATTGGGAATGGTTTCATTGTGGCCACGAATGCCATTGAGTGGTTCCAGAGCAAAAGACTCT  
CCACTAGTGATTTTACTTTGATGATTTTGAAGTTGTTCAAGACTCTTGTACAGTTCTGGTTGATGTTGAAAAATACCTTAC  
AGTTTATTATTTCCATTTTCTTATAATCAAAATATAGTGTATAAAACCTTCAAAGTCATCTTATGTTCTGAACTATTC  
CAATCTCTGGTTTGTGCTTGGCTCAATGTCTTCTATTGCATCAGGATTGCCAATTCACCCATCCCCTGTTCTCAGGC  
TAAAGTGGAGAATCACTGGATTAATGCCCTGGCTCTCTGTTCTGCTTTTCAATTTCTTGTGCTACAGTCTTCCATT  
TCCATGGATGCTACAATGTTTTTGTAAATCTTCCATTCCAGTTCCTCTCCCAATACCACAGAGAATAAATTCATTAC  
AGAGACCAATGTGGTTAACTTTGCTATCATGTATCACCTGGGCATTTTATCCCTCAATCATGTTATCTTGTGAGCTA  
CTCTATTGATCATCTCTCAAGAAACATACTCTCCAAATGAAGAATAATGCCACAGGTTCCAGAAATCCAGCATGGAG  
GCTCATATGGGAGCAGTCAAAGCAATTAGTTCCTTCTCTCTCTATGTCTTCACTTTGTGGCTTGTCTCTCTATAT  
GGCCAATGTCTTTAAAAACAACAGCGTTGGAAATATTTTATGCAAAATATCATTACTGCCTACCCTGCTGGTCATTCAA

TTCTACTGATCTTCAGCAATCCCAAACCTAAGAAGAACCTGGAAGAAGCTTCAGCACAAATGTTAGATTCCACCTAAAACAT  
TAG

>Modo-T2R41

ATGGTAGCAGCACTCATTATCTTCTCTATGGTTCTCTATGCCCTATTGTGCCTTCTGGGGATCATGGCTAATGCCTTCAT  
TGTTGTGGTATTTGGGAAGGGAGTGGGTTTCGATGCCACCGGCTGTCTCCTTCTGACATGATCCTGATCAGTCTGGGCATCT  
CCCCCTTCTGCCTGCAGTGGGTTGGAATGATAAACTGCTTTTACTATTTTCTCCACAGGACACAATATAACACGGGGCTT  
GCCCCGCCAGTACTTTGGGCTTTACTGGGATTTTCTGAATACGTCACATTCTGGTTTGGCACTTGGCTTAGTGTCTCTT  
TTGTGTGAAGATTGCAAACCTTCACTCATCCATTTTCTTTGGCTGAAGTGGAGAGTCAATGACCTGATACCGTGGCTTC  
TACTAGTTTCCCTGCTAATCTCGTTCATTGTCAACATGCTATTTTGTGGGGAACAACATTATGTACCAGGCATTTTGT  
AAGGGGACATTCTCCGGGAACCTAACCTTATATGGCTTGCCTAAGAGACTAGAAATCCAGTATTTTCTCCCTTTGAAACT  
CATTGCTTTGTCTATCCCTGTTCTATGTTTCATAGTCTCAACAGTTCCTTCTGATTGCCTCTCTGCGGAGACACTCCTGCA  
GAATGCAACACAGTGCCCGAAGGACCCAGGATCCAAGTGCTCAGGCTCACTCCAGAGCTCTGAAGTTTCTGGTTTCTTTC  
CTGGTCTCTATGCTCTTTCTGTCTTCAATCATTGACGCTGCTGTCTTTGCTTTGATTGAGAAGATCTGGTACTG  
GCCATGGCAAATTTCTGATTTTCTGTGTGTTTCAATTCATCCCTTCATCCTTATCTTTGGAAACTCCAGCTAGGAGGAA  
CTCTCAGGAAGCTCCTTCGGCTGCCTAAAACCTTCTGTAATGACAAGGGGACATCGTCTCCTTCTAG

>Modo-T2R56

ATGTTTCAGAGGAGACATAAAGCTTGAAAATGGCGTGATTACCTTAATTGCCTTTTTTTTCTTCTGTGTCTGATACTGAT  
TGTGGAGAATGGCTATATCCTTGTAGTGCTGGGCAGGGAATGGGCACAGTGTGGGACACTGACTCCAGTTAATAAGATCT  
TGACCTGCTTGAGTGCCTCTCGCTTCTTTCAGTGGGGGGTATGTGGAAAAACCTGTATGTGTGCTCTATCCGATG  
GTCTTCCCATACAACCTGTACATCAGTACTTATCCTTCCATTGGGATTTCTTGAACCTGTCTCTCTATGGTCTCTGC  
TTTGCTCGGTGTCTTCTACTGTGTGAAAATCACCACCTTCACTGACCCTGTTGTCTCTGGCTGAAATGGAGGATCTCTA  
GGTTTGTGACCTGGCTACTATTTGGCTCCTTTGGCATCAGCTTGTCTTACTGCCTTCTGTTCTTATAGGTAACATATT  
ATCTATTATATCTACTCAGTGAGGAGTCTTCTATCTGAGAATTCTACTATGAAAAATTTGAGAAGACAATTGGAAACATA  
TTACTTTTTCCCTCTGAAAGTAATTTCTTCAATTCCAGCAGCTATCTTCTCATCTCTATGGTTTTCTTATCACTT  
CCCTGGAAGGCACAAAAAGAAGATGCTACATAGTGATTCTGGCTCTGGGACTTCAGGTTCCAGGCTCACACCAAGGCT  
CTTAAGACCCTCATCTCCTTCTTCTCTCTTGCCTCCTATTTTTTGAATAATGGTAAATGCTTCAAACATCTTGCC  
CTCTTTGAAGTCATGGTACTGGGGATGGCAGGCTTGTATTACCTTTGCATAGCAATCCACTCCATGCTTCTGATCCTGA  
ATAACCTTAGGTTACTATGTTGGAGAAGAGCTGCTTGA

>Modo-T2R62

ATGCCCAACCAATTACTCTCTTCTTCTATGATCTTCTTCTCCTAGAATCTGTGATTGCAATTGTAGAAAAAGTTTCAT  
CTTCATGATACCTGGGCAGGGAGTGGATGCGATGTGCGACCTTGCCCCCTGGTGATATTATCCTGCCCAGCCTGGGCATCT  
CCCCGCTTCTTCTGCAGTGGATGTCAATTTTTAGTAACCTTCTTCACTTATTTCTTCCCGCTTAACTAAGTGATACTTT  
GGTACTTTTTGGACTTTTAGTAACATGACCCTTCTGGTTCACTTGCCTTGGCGTTTTCTACTGTGTGAAAAATTC  
TGCTTTCACCTACCCAGTCTTCTTTGGCTGAAGTGGAGAATCCCCAAATGATCCACTTGTCTCTGTTTGTCTCCCTAT  
TGACATCCATTCTTTAACTACCCACAAAATTTAACAACCTTTTAACTTTCCAAGTGAAGTTCTCTGGGAATTCCTCA  
GAAAAGACCATTTTGGAAAGATAAGATGTGTGCATACAGGATACATTATTTATGCTATGCAATTGTTTATTTTGTACT  
TCCTTCTCTTCTTCTTCTAGTCTCTATCATCTTCTCCTCATTTCCACCCTGTGCCGACATTTGGGGAAGATGCAGCACCATA  
GCTCTAGTCTTCAAGATCCAAGTATGCAGGTCCATATCACAGCCCTAAAGTCCCTTTTCTTCTTCTCATCTCTACACA  
TCATACTTTCTTCTCTGATCATCAGCACCATCATACCCATTTCAAGTAAAGTCTTGGTTTTGGGTAAGGGAAGTAGT  
GACCTATGCTGGCATCTCCATCCATCCTGCCCTTCTGATCCTGAATAGTCCCAAACCTGAGAGGGGCTCTGAAGAAGATAT  
TTCATGTCCAGAGGCTGCATAA

>Gaga-T2R1

ATGTCCAGTTTATTTTCTTCTTCTGTCTAGTAATTGCCATATTTGAGTCAGTTGTGGGGCTTCTAGGAAATGGGACTAT  
CGTGGCTGTGAGTTCAACTAGTTGCATCAGGAGCAAAATTTTGCCTCCTATGATGTGATTGTGATTTTCTGAGTTTAT  
CCAGGTTCTTCTGAGCTCTGGATGATCCTGGATTTCTCCTAATTTTTTTTGTCAACCTCCTATTATGAAGAAAAT  
TTATTTGTAACCTTCAAGACAGTTTTATATTCCTGAACCTTTATAGCTTTTGGTTTGTGCTGGCTTAGTGTCTTCTA  
TTGTGTCAAGGTTGCCAGTTTTACCCAGTCATTCTCAGCTGGCTGAAGCAAAGGATTGCCAGTCTCATACCTGGATGC  
TGATAACATCATCTCTTTTTTCTTTGCAACCTCTCTCTTCTTCTTCTGGGATAGTACAACGCACACAGCAACTTCACT  
ACTCCTTTAACCATGACAAACTCTTCAAAAAGGATAACCACAAGGAAAACCAATTTGATTTTTTGTATCCTTCTGTAA  
TGTTGGTATAGCTTTGCCTTCAATAATGCTTGTTTTTTCAAGTATCCTGCTGATTAGATCTCTGTGGAGGCACACCAGAC  
AGATGCAAAATAATGCAACTGGCTTCAAGGATCCAGCTTAGAAGCTTCTATTGGTGCCATCAAGACAGTCTTCTCCTTC  
CTCCTCCTGTACATTACAAAATTTATCGCTTTGATTCTCATTTTATCTGACACTTTTGTACCTTTAAGCACTGAGGAAGC  
TATATGTGTTGTGAGTGGCTGCTCTGCTGCAGGACAGTCTATGGTCTTAATCTGGAGCAACCCAGATTTTCGAGAGC  
TGCTCAGTAGCATTTTGCCTACGTAACCTTGTGTGACAGCTAGATGCAGCTGA

>Gaga-T2R2

ATGTTACCACCAAGTCTCATCGTTTCAATGTGCATTGTTGCTATTGAAGTTGTTGTTGGATTTATGGGAAATGGATTAT  
TACCGCTGTTAATAGCATTAACTGGATCAAAAGCAAAAGAAATCTGCGAGCTGATATGATCCTGATCTTCTGAGCAT  
CAAGATTTATTTTGCAGGTGACTGTAATGATGTACATTACAGTCTCTACTTTACAGATGTGTTTAAAGTTGGCTTCTGTG  
TACAAAATTTTGGTGCTATATGGATGTTTGTAAACCATGCTAGTTTGTGGTTCAGTACTGGCTCTATGTCCTTACTG  
TGTTAAAATAATCAATGTACCCCAATGGTTGTTGCTACAAATCAAGCACAGAATAACTGCGATGATTCCATGGCTGCTTC  
TAGGATCACTGTTAATTTCTTCTGTAACCTTCAATTCCTTTATTGTGGATTACCCCAACACCTACCTCTGCAGGTCAACG  
GGGAACCTGTGGAGACAATAGCACAGCACATATCAGTGGCTGGGATAGTTCACATTTGTACCTGCTTCTTCTTACTTTAC  
AGGTTGTTTTTCTCTGTTACTATCTATGATAACTTCAGGCTATTAATTAATCTCTGTGGAACACACCAAGAAGA  
TGCAATGCTATGTAGATAGCTTCAGGATCCTTTGATAGATGTTACCTAATTGCCATCAAGTCCATTATTTCTTCTCTG  
ATCCTATATATTTCCAGTTTTGTTGCTCAAAATCTTTGACTTTGTCAACTTCTCAAAGCAAAGATTTTGTGAAGTTGC

AGTATCTTTAGTTGTAAGTGGAGCATATCCTTCAATACACTCTATTATCCTGATCATAGTTAATTCAAAGCTGAAACTGG  
CATTGAGGATGCTTTGCCAACATTTTATGTGTCATTTGGAAAATGTGAATCTCTAA

>Gaga-T2R3

ATGGCAGAGCAGCACACAACATTATCCAGTAGCGCTTCGTGGTCATCTTCGCCTTCAGGCGCTGGCCGGCATGGG  
GATCAATGCCCTTCATTGTGGCTGCGTCTTGATGGCTGGTTCAAGAAGAAGGGCATGAACCTAACGAGAAGATCTTAC  
TGTTTCTGGGCTGCTTCAGGTTTTGGTATCTGTGCGCCACGTGGATATACCTCATATTTCAAGTGTGTTTCCCGAGAAC  
CTTTTAGACACAGGCATCTCTCACTTTTGCAATTTTTATGTGCTTTTTAAGCTCTTCCAACTGTGGACTTCTACCTG  
CCTCTATGCTTTTTACCTTATGAAAATTGCCAATTTAGGCACCATTTCTTCATCTACCTGAAAGCCAGAATCGACAGGA  
TTGTGCCGTGGCTGCTGCTGAGCTCCGTGGTCTGTCCCTGCTCAACTGCAGCCCTTCTCCTCAAAGTTATTGATGAAGAG  
AACAGAACAGCCCAATTTACACACCAAGGGATTTCTGGAACGAACGAAGAAATAAGGAAACATTTTAAACAGCAT  
AATTTCCATCTGCACATGTGGGTTTTCCATGGCATTATATTGGTAACCTCTTTGCCTTCTCTCCTCTCTCTCCTCT  
GCAGACACAAGCACAAGATGCAGACCAGCTCCACAGGAGCCTCAGCATGGATGCCACATCAAAGCCATGAAATCCCTT  
CTGTCCTTCTTCTCACCTTCAGCATTACATCTTGTGATCACAACAGTGTATTACAGCAGCAAGGAAAATTTCT  
GGTGTACTCCTTTTGGTCTTCAATACTCTTTCCGGTCATTATCCCTTATTCTGATTTTTAGCAACCCAGACTGG  
AAAGGATAGCACTAAGGATTCTGCCCTGTGCAAAGTGCAAGGAGTGCCAGGCAGCCACCAGAACCCGATGCTTTGT  
TCTTAA

>Xetr-T2R1

ATGTTCTCCCCATTTGTGACTGCAATGAAAATACTGTGTCTGGCTGAGTTTGTGATGGGAATCCTTCTCAATGCTTTT  
CGTGGTAGCCAATGCCGTTTCATGGATGGAGAGGAAGCCCTTGACTCTATTGACCTGATTCTGACCAGCTTGGGGCTTT  
CTAGACTTGCTCTTCTGATAACATGGCTGCTTTATGTCTATCAGAAGATAGGTATGAGCACATAGAGATACTGAATGTA  
ATGCTTCTTTTTTTGGCTTCTGCAGCCTCTGGTTTGGGACGGTTCTGTGCAGTTCTACTGCGTGAAGATCCCCAACTA  
CAACCATCGCTTCTTCTCTATGTGAAACTGAGGATCTCAAGATGATCCCGTGGCTGCTATTAGTATCGGTGACAAGCT  
CCTTCATCAGCTGCTGCCCATTTGGATGGAGTATGACAGTTCTATGTTCCACTACAATTCACAAAATGGCACAACATG  
GAGACCACCTGTACCTCCAATTTCTTATTATGTAGCTGGAATTCAGTGCCGTTCTTCATGTTCTGCGTTGCCATCAC  
TCTTCTAATCAGGTCCCTGTGGAACACACAAGGCAATGGCTGCGGGGAGGTTGGATTGGGACCCCCAGCTTCAGG  
CTCACTACAGCGCAATTAGATGCATGATGTCTTTCATGGTACTGTATATTATCTTCTCATCCTCTGTGTTCTTGGCTCTT  
CCAATGGTGTAAATGAATGATACGTTGCTATGGTTGTATCTTTATTGCTGGTTGTACCCGAGCCTGCACTCTACAT  
TCTATACTGAGCAACAGAAAGCTCCGACGGGCCCTGTGCTCTCTCTTCTTATACAAGTACATTTATCCCCAGGAGA  
GGAACATATCCCCTTGTGAGTAA

>Xetr-T2R2

ATGGCTTCCCCGCTGGAGATATTTCTATTAACCTCTATCTGGATTGTGACTGCGGTGGGAATTCTGCTCAATGCTTTT  
CGTAGCCATGCCCGTCATTTGGTGGGTGAGGTATAACAAAGTAGAAATGATAGAGTTCCTGCTGGCCAGCGTGGGGATGT  
CCAGAGTGGTCTACTGATATTATGGGATGTGCTATACCTTTGGTCCCCAGCAATTCAGTCCTATTTGCAGTGGTTTCC  
ATGTTCTCAGCTTCTGGAGCCTCTGGGTTGCTACAATCCTGTGCGTCTTCTACAGCGTGAAGATCAGTAGTTGTACCA  
TCCGTTCTTCTGTTCTCAAGCTGAACGCTCCTCAAGATGCTGCTGGGCTTGTCTTGGTGTCCCTGGCAAGTTCTCTCC  
TATTCAGCCTCCCCCTTAAATGGCTGGTGTACAGTACCTCCATCAACACGCTACCAACTCTACCAACTACCAACTCT  
ACCGGACAAGGAGGGACCATCTGAAGGTCAATAATATCAACAGTTCTTCTCATCTGACCGGATCCTCGGTGCCGCT  
CCTTATCTTCTGTGTGGCAGTTGCTATTCTGATCCGATCCCTGTGGAGCCACACTAGGAACATGGCCGGGGCAACGTGG  
ATTTTGGGAACCCCCAGATTGAGGCTCATCTGAGTGCAGTTAAAGCATGGTCTCTTCTGATTCTGTTTACCATTAT  
TTTGCCCTATTTGTTGATCATGTTTACCCCAATTGTTGGATGATACTGTGTTGCAATTGGTCTTTAACATTATTTCTAA  
TGCCTACCCGCTCTACACTCTCTCATCTTGGTAATGTACAGCAGGAAGCTCAGAGAGGCTCTACTGGTGTCTCCATT  
GTACGTGTAGAGTGCTTCCATGGCGAGAGGTTGAGCTTAG

>Xetr-T2R3

ATGTTATTCCCAATTTTCTTTCTATTTTCAATACACAATGCTCATTTTAGGTCTGGCAGTCAATGCCTCCATCACCAT  
TTTTATTTTGAAGCCTGGTGCAGAGACGGAACCTAAAGCCCAATGATAAAATCCTAACCGCCTTGTGCTTTCATCAGGT  
TCTTCTTGAATGCAACTTCATTACAGAAATCTTTGGAATGTGGCTGGAACCTATCCCTCTGTGCGGATACAAACCGCG  
TGATCTTCTACTTCATCCAGCTGTTTATGGAATGCTGCTGGAACCTATCCCTCTGTGCGGATACAAACCGCGC  
GAAGATCACTATCTTTAAATCTTCTTCTTCTCAGCTTCAGTCTGATTCCCGAATCACCAGATATGTGATCTTTA  
TATCCGTGTTTCTTTTGTACCGGGACTGATTTATCCCTGAGTGCTAAACAGGGATTTTGTGAGGATGCCAAAGGC  
GTCAATGTGACAACAAACACGGATGAGTTACTGGCTTTCCGTATCATTTGCCCTTTTCTTGGACACAGCTTCCCCCTCAT  
GCTAGAGATGCTTTCATCATATATCTCCTGACCCCTGTTTGGCCACATCAGACACCCGAATCTACATTTCCAACT  
TCACGGCGCCCAACATGGAAGCCCACTGGACTGTTATTAGGTACATTTTCTAATGAATCTCTTGTCAATGTGCAATTT  
TTTGGCAACTTTTTCTCTGGTCTTCTCATCTCCAGTTTTATTGGAAGAGCCGTTGGATACTTTCTAGCTTTCTCTATCC  
TACCTTCCATTGAGTTGCTCTATATTGTCCAACCCAAAGATGAAAAGAGAAGTAGTCAACATGTTCCATTGTGCAACAA  
AACTCTGGAGTTTCAGCAAGCAAGAACCAGGACGGTTACCCATGATT

>Xetr-T2R4

ATGCTGACCATATGGATATTGTACATTGTCTATTGACTTATTTCTGTAGTGGTATCATCTCCCGGACACCTGTTGT  
TATGCTTGTGAATCTACAGGACCTGATCAATAACGTAATTTTCAAGCTTAACGACCAGCTGATTTTTTGTATCAGTCTCT  
TCAGTTTTGTTTATGGAATGTCAAATATGCAGTATTTTTGCTTTGTTTGGCTATGGGATATATCAGTTGATGGT  
AAAAGGTATATTTCTGTGCTGCTTTCGACTATATCTTCTGTATTCTCTGGTATTGTACCTGGCTGTCTTTGACTTTTG  
CTTAAAAATTTGTCAATTTCAAGCAAGGATTCTATGTATATCTACAGAAGAACTTCCACAGGATGTTTCCATGGATTATA  
TTATATCAACGATGGGGTCGTTTTTGGCCTCTTCCCGTTGGCTGGGATGTCACTGAATACTCATTAATTAATCAACAAGT  
TGTGCAGCCAATCAAATATGTTTCTTCTTATGTCCAATGGAATCGCTCAAGGTTATCATGGTGGTCTCTTTGTGGC  
TTTTTTGCTTTTCTCAGTTTCTTATCCATAATCATATCACTTTACAGACACATCAGGAGAATGAAAACCAACATGC  
AGTCCTTTAGTGACACCAAGTTGTGATGTCCATGTTCTGTAAACGGAACAGTGGCTGCTCTTTGACGCTAATGCTCTG

TACTATTTGACATTGCTTCTCTGTGCTTTTCTCCAAAATTCCTATATTTGGCAATGTGTCAATTGCTATCATATTGTCCCT  
TACTCGTGCCCCAGGCTATATCCTAGTAAGGCTAATAAGAAGCTGGAGGTGCACCTAAGACAATGGTTACATTGCT  
GTGCATGCATCACATCAAGTTCAGATAATTTTGAGTAA

>Xetr-T2R5

ATGTCATTTCCGATTCCCGTGGCTGTTTGTCCCTGGTTCCGACCGTGACAGGGTTGGTGGTCAATGCCTTTATCACCT  
TGTAACATCCGGAACATTTAAGGGAACAGGGGCTGAACCATGTGATAAGATTCTAATGGCTTTGTGCTTGACAGGT  
TTCTCCTGCAATGGACTTTCTTCTGGATATCATTGGGATTTTGTCCAGTTGATTCCTTTCTCCACATTCGTATCTAC  
TGTATCTTTATGTGGTGAACAGTTTTTGGACTACTTCAGCCGGTGGCTAGCGATGTGGCTCTCCATTCTGTACTACGT  
CAACATCACAAATCTTCAAAAATGTCTTAGTCCTCTATTTGAAGTCAAGGATCCCCACGTCACTAGTTACATGATCTTCG  
TCTCGCGTTCCTTTCTTCCGCCCCGGGACTGATTATTTCTTTGACCAGCAGTGAGGTCTCTTGCTGAGGGTCTCCAAC  
CAAAGTCTTTCGAAGAATGCAACTTATGAAACCAAGAATTCTTGTCATCTCCTTTGTCTTCGGACAGTGTTTGCCTTC  
TGTGATAGAGATGGTTTCATCCATTTATCTGCTCTGGACTTTATTTGCTCATGTCAACTACACCAAGGCCAATGTTTCCA  
GCTTCACGGCACCAACATGGACGCCACTGGTCTGCAATCCGATGTATTCTTCTACTGTATTTATGCTGCCTGTAAAT  
TTCATTGGGAACCTCATTTTATATTTCTTTCTAATGATTCTTTTGGAGTTCCCTTAGTTACATAAATACCTTTGCTTA  
CCCCACTCTGCATTCTGTCTTTTTGTACTGAACCATTCGAAGCTGAAGAAAGAACTGGCAAAAATATTGTACTGTGAGA  
AATCTGTGGTTGGTTTCAGAGCAGAGACTGTGGTAAGATCATCTCTAGGCCAGGCCATA

>Xetr-T2R6

ATGTCATATTTGATTGATGATGTTCTCTCAACTGTTTTTTCAGTAACTGCCGTTCTTTTGGGGCTGGCAGTAAATGGATT  
TATCCCACTTGTAACATCAAAGACTGGGTACAGTGAGGAAGATGAAGCCCTCTGACCGGATCTTAACGGTTCTGTGTT  
CCACCAGATTTTTATTGCAATTTACGTTTTTCTGGAACCTACGGGCATTTCTTTTGGCCTGATCCCATTGTGCGCTAT  
GCTGCCTACTGTATCACTTATGTGGTGGAGCTTTTACTCGATCTATTCAGTCATTGGCTCAGTATGTGGCTTTGTGCTT  
GTACTACGTGAAAATCACAACTCCAACATCCATTGATCTCCACCTGAAGTCAAGGATCCCCGGCATCACCAATATG  
CTCTCCTCCTCTTTGGGTTCTTTTCTTCTTAACAGGACTTGATATTACGTGAGCGGAGATGACATCTCTTGTCTACAC  
GGCATCAGCAAGAATTTGACAGCAACAGAACCTTTGAAAGCCTCAAGAACGGTTGATGATCGCGTATTTCTTTGGCCA  
AGCGTTTCTTTTATGATGGAGATGATGTCGTCGATGTATCTCTCTCGTTGTTGGTTTCCACGTGAAACACACCATGA  
GCAATTTTTCCAGTTTTAAGGCACCCAGCATGGACGCCACTGGTCCCTAATTCGATACATTCTTCTACTGTATTTCTTG  
TCTGCCTGTAATTTAGTTGGTAACTTCTCTGTGGCAAGTAACATCTCATTTCTATTGGGCGTTAGTTGGTTACTTTAT  
TATCTTCTCTTATCCTTCTTCCATTCCATAACTCTTGCTATGTAATCCCAAGCTGAAAGGGAAATGGTAAAACT  
TCATCTGGACAAGAAACGTACTTTGTGTTTTGAGGAGACGGAGGATTCCGGACTGAGACTGTTGCCAGTGA

>Xetr-T2R7

ATGATTGGGCTGTATGTTGTGGGGTTATAATGGCGGCCGACTGGCGGTGAATGGATTATCACTCTAGTTAATATCAC  
CGAGTGGTTGAGGGAAGGAAGGTTGAAGCTCTGTGATAAGGTCTAACGATATTGTGTTGACCAGATTTTTCTTACTAT  
GGATTTTTTCTGGAAATGATTGGGTTCTACTGCAACTCATCCATTCTCCGCATTTGGAATATATTGATTTTTTAT  
GTGTTTGAGCTTTTCCCTGGACTATTTACGCCGTGGGTGGCCATGTGGCTCAGCGTCTGTATTTTGTATGATAACCAT  
CTCCAAACAACCTTTTATGCTGAGTCTCAGGTCCAAGATCCCTCCATCACAGGTCATGCTGTGGGTGCCATCTTGC  
TTTCTTCTTCCAGCCTTGACTTACTCCCTGACTGAGAAAGACTTTCTTGTGTACAAAACCCGACACAAATATCTCA  
GCCAATGGGACGTCTGGATTTCCAGACCTTTCTATTGACTTCGTTCTTTTGGACATTGTGTCCCTTATATGATGGA  
AATGGTCTCATCCGTGTATCTTCTGTACGTTGTTGTTACGTTAAACACACAGAAACCAAGGTTTCCAGCTTTTCCA  
CCCCAACATGGCGGCCATTGGTGGTTATACAATACATTTTGTACTGAACCTTTATGTCTATGTGTAATTTTGTGCT  
AATATTTTTATCTGGTTCTGGATCTCGGATAGAGATACCTCGCCGCTTATATAATAGTTTATTCATATCCAGTCTTGC  
ATTCAATCGTTTTATCCAGAACAATTTAAAGCTGAAAAGAGAAATTCAAAAATACTCCATTGTTCAAAAACATTGTGT  
TGCCCCAAGAAAGAACCATCTGA

>Xetr-T2R8

ATGGCAGACGGAGAATGGGTTGCCATTGGCTGGGCCCTTCTCGTCTACTGGGAACAGTTTTCTGGCTGGGGCAGCAAT  
TAATATATTCATTGTGGCCGTGAATCTCGTGACTGGTTGAAGAGAAGGCAACTTAGTGATCTGGACAAAGTTCTGACCT  
GTATTGGGCTCTCCAGACTGGGCCTTCAAGTACGACCACCATGACTGTCTATGGGGTCATTTTCTTTCAGATGGATTTA  
CTGTACGAAGCAAAACGGTCTCAGAAGCTCTCAGGTCCCTTGAGTTGTTCTTCAACTACTCCAGCACTTGGGTCAACA  
GTTACTCTCTTTCTTCTCTGTTGAAAATCGCAACTTCCACCACCGCGTTTGTCTCTCAAAGAGAGAAATTTCTC  
AACTCCTGACGGCTCTGGTTATTCTTGTCTTTGCTTAAATTAACACGTTGTGCTTACGTTGTGGCTCTCTCAT  
ATCAATGGGCTTCTTGGGAACCTCAACGCACGACCTCCATGAAAATGTGACCGCGTCCCAATCGGACAGAAGAGTTTTGT  
TTATTTGTTGTAGCTGGGAACTCTTCCCTTCTGCTATATCCGCGGTCTCATTAAACCTCTGCTTGTGCTGCTCTCGC  
TCCACATCAGGCAATGAGAGACAGCAGCCACTCTCGCCAATCTGGACAAATACTACACTGCCATCAAATCCATGATA  
TTTTGCTTTCTGATCTATAGTATGCACATTGGCATTGGCTTTGCGGGCTCCCATATTCTTTTCTATGAATATCATATG  
GATACAAATAATGAAAAATCTTTTCCAACATTACATTCTTTTCTTATAGTAGGGACGGTCAAGCTGAGGCGACAGT  
TCTGGAGTAAACCAACGGCGGCAAACTGCTTCTAAGGGGAGCTCCATGGAAGTACAGAGACAATTCCTCCCTAG

>Xetr-T2R9

ATGCTTAACATTGTGACCATGGCCATAGATATTTGCCTTCTCATGGTTGCAAGTTCCATGGGATTGGTTTATTATTTTAC  
GATGATCTCTGAGAGAGTGAGAAACAAAAGGCTTGGTAGAAGTGAACAGCTGATCTGCGTCATCAGTGCTTTCAACTGCT  
TTTATTACCTAATAAAAGTCAGCAGATACCTCAATCTCTTGCTAATCATGCACAGCATCTCCATTTTCAGCAAGAAATAT  
AAAATGGGAGAATTCATTTTCTGCTTACTATGGTGTCCAGCAAACTCTGGGTTTCCAAGTGGCTGTGCGCATACTTTTG  
TCTGAAAATAGTTTCGTGTCAACCACAAGTTTTACATCTGCCTACAAAGACTTTTCCCAATTATGTCCGTGGATACTTA  
TTATATCTATATTTGATCTTTCTGTTCTAAGTCTTACTGAAGTATGCTGAATGATGAAAAGCTTCTTGATTTTCCCTAC  
AATCAAAATGATCTTCCAATACAGTGTCCAAAATGTCAATTTTATGCAAGTATACATCATGTTCTGCTTAGCTGC  
TATCTGATTTTCAATTATTTTGGCTTTGACAATCATTGGCTCTCTGTGCAGGCACATGAATCGAATGAAGAACAATTTGA  
ATGGAACAGAATAAGCAATGTAGAGGCTCATGTTCAAGCATCAAGACACTTGTATCTCTCTGTTTACCAATGTTATC

TGGTTTAACATTGCAAAATTTATTAATTATTGATACCCCAAAAGGTTTAAATAATGTAACCTCTCCTCTCTCACTCTGAA  
TACTCTCCTCAGCTCTGTAAACCTAATAAGAGGAAATAATACACTTAAAAATAAACTGTCTGATATTTTAAATATGCTTAT  
CTTGTGTAGTCAAGCTTAG

>Xetr-T2R10

ATGGCTTCCCCGCTGGAGATATTTCTATTAACCTCTTATCTGGATTGTGACTGCGGTGGGAATTCTGCTCAATGCTTTTCAT  
CGTAGCCATGCCCGTCATTTGGTGGGCGAGATATAACAAAGTAGAAATGATAGAGTTCCTGCTGCCAGCGTGGGGATGT  
CCAGAGTGGTCTACTGATATTATGGGAGGTCGTAACCCATTGGTACCCAGCAGTTCTATCCTATTTGGAGTTGTCTCC  
ATGTTCTCAGCTTCTGGAGCCTCTGGGTTGCTACAATCCTGTGCGTCTTCTACAGCGTGAAGATCAGTAGTTGTACCA  
TCCGTTCTTCATGTTCTCAAGCTGAACATCTCAAGATGCTGCTGGGCTTGTCTTGGTGTCCCTGGCAAGTTCTCTCC  
TATTAGCCTCCCCCTTTAAATGGCTGGTGTACAGTACCTCCATCAACAACGCTACCAACTCTACCAACTACCAACTCT  
ACTGGACAGGGAGGGACCATCTTGGAGGTCAATGTTATCAACAGTACTTTCTCATCTCTGATTGGATCCTCATTGCCACT  
CTTCATATTTCTGTGTGGCGGTTGCTATTCTGATCCGATCCCTGTGGAGGCACACTAGGAACATGGCCGAGGGCAACGTGG  
ATTTTGGGAACCCCGAGATTCAAGGCTCATCTGAGTGCAGTTAAAGCATGGTCTCTTTCTTGGTTCTGTTTACCATTAT  
TTTGTAAATAGTCATTGTTATGCTTTTACCCCCACTGTTGGACCAAAATGTGTTGCAGTTGGTCTTTAACATTATTTGTAG  
TGCCTACCCACTCTACACTCTCTCATCTTGGTAATGTACAGCAGGAAGCTCAGAGAGGCTCTCTACTGGTGTCTCCATT  
GTACGTGTAGAGTCCCTTCCACGGAGAGAGGTTCAAGCTTAG

>Xetr-T2R11

ATGGAATTGGCTGTGACTGGGATGTTGTTTAGCCAACTGGCGCTGGGGGTGGCCATTAATGGCTTCATCGTGGGGACGTA  
CCTGCTGGAATGGAGGAAGAAGCGAAGTCTCCGTATGACCGACGTAGTCTGGTGTGCTTGGCCGTCAATAGATTCTCTGT  
GGCAGCTGTTCCATACCTTGGGGTCGGTATTTTCATTTGTGCAAGTCGTAGTCACCATCACGTATCAGGTTGTCTATTCC  
GTCTGTGCCCTTTCTAAACTGGAGCGGCTGTGGCTCGCTCGGTGCTCAGCGTCATTCAGTGTGGAAGATCTCCAACTA  
CAACAACCTGGCTGTTTCATCAATCTGAAGCGGAGGATCTGCTGGCTGGTCCAATGGCTCCTTCTGGCCAATCTCCTGACTT  
CTCTGGCTTTCACTCTTGCACCTTGTGTGGTTCAACATTCCTGAGAATCCAGCCAATTTCTACAGATGTCTCCTCACAGACC  
AACGCAACCGTGAACCTTCTCCAGAACATTCAGTCCGTTATTGGTTCTGTGCTTGGGATCCCTTCTGCCGTTTCATCAT  
ATTCTGTGTGCGCGTTTCACTACTGATCAATTCCTGCGAATACACGTCCAACAGATGAGAAGCCGAGCAACAGGGTTCC  
AGACGCCACACTTAGAAGCTCATATAAGAGTGATAAAGAGCATGGCCTTTTTCTTGTCTCTTTCTTTTATTATAGTG  
GTCATATTTTGGGGCAGGTAAAGAAGATGTTGGTAATTGGCTGTACTTCTATCTTGGGATGGCCTTCTACCCATCACT  
CCATTCTGCTGTGCTGATCTATTCCACTCGCCAGTTAAGAATGGCATGTTTAGCTATTTATTATGGAACCAAAAGTTAA  
TTTGTGTGCATCATGAAAGGTCCACCGGATCTGCAGTAA

>Xetr-T2R12p

ATGGATCTTGTCTCGGCTGTGGAGATCATAGCAGTTCCTTCTGGGGGCTGCAGTAAATGGGATCATTGTGGGGACCTTTT  
GCCTGGAATGGATAAGGAACCGAAGCCTCCAAGAAGGCGATACCACCCTTATGTGCTGGGCTTCAACAGACTCTTTTTG  
CACGGGTCTCTATTTTGTCTATTTACCACAGTCTTTTCATGTGATCCATAAACCTGAAGTCGAACAGTATTTCTTG  
GGCTCTCTGTGTTTTCCATACCTCCAGCCTGTGGTTTGCTTCTTCTCTGTGCCATCTACTGTGTGACAGTTGCAAC  
TATTTCAACTCCTTATTCGTCTATGTGAAGCGCAATATCTCCAGGCTTGGGTCATGGATGATTGTGGCCATTCTGCTGAC  
TGCTCTGACTTTCACTCTCTGGACTGGTATATTGCGTATGGTTTTGGCCTGTCTCCGAGCAATTCTACAGGAATTATAC  
AGCAGCGGAACAGCACTGGGGCCGATGGGAATGCAGCCACCACCTTGGGGTTCAATTTGTTATATACTTTATGGCGGTC  
GCACTGCCATTACATTATACTGCCTGGCGGCTTTGCTTTTGTGAACCTCTCTATGGAGACACGTCCGACAGATGAGAAT  
CAGCGGAACAAGTTTCCGGAGTCGGAGTGTGGAGCTCACGTGGGAGTATTAATGAACTGGCCGTGTCCCTGTTACTGT  
ATGCTGTGATTACGTAAACGGATACTTTGGCTTATATGGGCAGCTTGAAACACCTTGGCTCTTATTCTGCTTTGTTATT  
TGCTGTTTCTACCCACTGCCATTCTCTGGTCTTGATTATTCCAACAGTCGGCTGAGGAAGGCTGCGTAGCGACGAT  
CCGTGGGGCCATGAGTTGGGAAAGAGAGAACTCAAGACAACCAACCCAGAGTGCAGATTAA

>Xetr-T2R13

ATGGATTTGGGTTTTCAAGTCATCTTATTGGTTCAAGTTCCTCTGGGGATCTCCGTAATGGATTCAATCTTGGGGTACT  
TTTCAACGAGTGGATAACAGGTGGAAGCCTCAATGCCATCGATATGATCCTTATCTCTGTGGGTCTCATCAGGTTCTCT  
GGCATTGGGTCAATTTCTGACCTGCCTATTTCCGACGCTGGTTTATTGGTATCGGCCATTTGTATTACTCTCAGCACT  
TTACTGAACCTGGAGCAGCTTTGCACTGGTTTCTGTGCTCTGCGTCACCTTCTGTATCAAAATCTCGAACTATAACAACGC  
CAATTTTCAATTTACCTCAAGCTCAGGATCTCCGATATACTGAAAGGCTGATCCTGGGTTCTCTGGGGATCAGTTTGGCTT  
ACAGTGTGATTTCAGTGCCTTGGGATATGGTTGTGCCCCGACAGAATAACTCTGACATTTTGTGAGAGGAGCGCGTTC  
TTCCTAATGGGGACAAGCACGGACTATAGCTTCGCTCTGTTCTGCTTTGCATTTTCCGTATCGTTTATAATGCGATTGTC  
CTCCATCTCAGCTTTGATTCACTCTCTCAGGAGACACATGCGACAGATACAATGCAGCGGGGAAGCCCTACAAAACCCAC  
ACCTGGCGGCCATATAAGAGTAATAAAAGTAATGCTAATATTTCTGGCCCTTACATTATGTATTTACATCGCTAGTC  
ATGGGTTCCTCGAAAGGTACAGAACTAAGCAGCTGCCGAATTAATGTATGTACTGTGCTGTACCCCTCTGTCCA  
TTCTGGGGTCTGATCTACTCCAACAGGAGGCTGAGAAAGGCTGTGTGGCCATGTGCTTGGATCCATTCAATGGGCAA  
AGGCCAGGAACCAATCGCCCAACCCAGAACCCCGGTGTA

>Xetr-T2R14

ATGGATTTTACGACAGTGGATATCGTTGAGTTGGTCTGTCAATTTATTCAGTTTCTCTTTGGAATAACGATCAATGGGT  
TATCATGGGGACATTTTCCATGCACTGGAGAAGGAATAAAGCCTTCAAGCCAGTGATACGGTCTGATGTTCTGAGTA  
CAACAAGGTTCTTCTGGCAGTGGGTCCTTTCTCTAATGATTCTCTATAATTACATCACATTTTCTTGGACTTTCTCCAA  
CTTTTGACTTATATCAGTAATTTTTTAGAGTTGAGCAGCTGTGGTTGACCTTTACTCTCTGCTTCACTTACTGTGTGAA  
GATCAGACCATCCCACTCCTGTTTCATCTACGTGAAGCTCAGGGTCTCCATGCTTGTGAAATGGATGCTTCTGGCCA  
GTCTGCTGGCTTCTCTGGCTTTTACTCTCTGCTCAGGTTTTCATGGGATATTTTTTCTACAGACACCGACCCACGGAAC  
AGCACCGAGACGAATGGAACCTCGAGCTCTGAGCTGCTTGTGTGCTACATGGGAGCTGTGCCACCGTTCTGATATTTCTG  
CCTGACATTTTGTCTTTTCAATTTACTCTTTTGGATTTTTCATCCACAGGTTTAAAGAAGCAGAACGGGTTTCGAGAGTC  
CTGTGTTGAGTGATCATTTAAAGTGCTCAAAAAGATCTTTTTTGTCTTTTCTTTATGTTATGTTATTTTCATCAGCTCT

GGTTTGTTCTTGTTAAACGGCAGCAAAATGGCGCATTGGGAACGATGGCTTTTTATTATTTACCAGTTCTACCCAACGGC  
TTATTTGGGTGGCTCATCTCTCCTCAACTGCAGACTGAAACCGTTTTCTGTCTATTTATCAGAGGGCGTTGCGCCTTA  
TAAGAAATAAAGCCAAATTACCCAGACCCAGAGGGCTGTGTAG

>Xetr-T2R15

ATGACTACATCAAACAGTCCTTCCCTGTGAACCCCTATCAGGTGGTCTCCTGGGCATCATAATGTCCCAGACACTCAT  
TGGAAGTCTGGCAAACGATTTCATGTTTCTAATCAACCTGATGGACTTTCATCTCATGGAAGTTTGGGATCTGGTGATG  
CTCTGTTACTTTGCCTTGGTCTCTCACGCTTCGTTTTCCAGTGGCTTTTATTCACAATATACTTGTGTCTTTTTGGTTT  
ACCGACCTGGCGGTTTTATACATACCCAAAATCATATTCTCTCTGTTTTTATAGCAGCACCAGCTTGTGGTTTGCAC  
CTTGCTCTGCAGTTTCTACTGTGTTACTTTGAGTAACTTAACAACCTGTTTTTTCTATACATAAAAAGGATTTTGACC  
GCTGGCTTCCTAAATATCTTCTATTTAGTGTGGCATGTCAGTGATCTTCAGCCTTCCTCTGTCTACGTTACGTTCCAC  
AATATGGGCAACTGGAGCATTTCCGGGACCTCCTCTGCATTTCTGTTTGTGAGAACCAATAGCGTGGCCTTTGTTTCAGT  
TTCGTTCTGGGAAGTGTCTACCATTCCTTGATTCTGTAGGGCAGTTATTGTGCTGGTTGTGTTCTCTGGAAGCAG  
TCCTGAAGATGAAGAGGCAGGAGAGGACTGACTATAAGGAACCATCAATGCAGGCTTACTACAGAGCAGCCAAGGCATTG  
GGCTCATTTTTCTGTTTTATTCTTTCTACATTGTGGCTTTCAACCTGTACATATCAGGAATTGCCACTTTAAACAACCTT  
AATTGGCTGCTTTGTACAATGTTGATTGGATCCTATCCATCTGTGCATTGAGTTTTCTTATTCTTCAGAACACCAAGC  
TCCAGCAAGCCCTCGCCAGCTTTCAGCAGAAGATCCGATGCTGCTCTTCCCCGGGAACCAAGACTGTTACTGACCCAACC  
TGA

>Xetr-T2R16

ATGAATTTCAATCAGTCATTATTGACTATAAGACTGTACCTCTACGATCGTATCATTTGAGGTGCTCATTGGAAGTCT  
GGCTAATGGATTTATGGTTACGCAAGTCTGATAGACTGTGCTTCTCGCAGGAAGTTGGGCTCCTGTGAATCCATATTAA  
TCTGCCTTGGCCTTTCACGCTTTCGCTTCTGTGGACCTGTTTTTATGTACTTGATGTCGGTTTATCTTACTAGCCTG  
AACGGTAAATATACGGATGCTGTATGTACATCTTCTGTGCTTAGCAATAGCAGTTTGTGGTATGCCACATGGCTCTG  
CATGTTCTACTGCGTCCGCATCTGTCAACATCAGCAACTGCGTCTTTGTTGTTTTCAAAAAGAAATTCGACCGCTGCCTTC  
CCGTCTTGCTTCTTGAAGTTTAGCCATATCAGTAGCCTTCAGTCTTCTTTACTCAGCAATAGTTTGACCAATGTGGAC  
TTCATCAGCTCATAACTCACAACCATAGGGGTTCCAGCAAATCCACCTCCCGCTTCTGATTACTTCTTTCATAGG  
GAGCGCTCCGCCATTTCTAGTTTTCTGCATAGCAGCTTGGCTGGTGGTATATTCCCTTACGAAGCACACAAGGAGGATGA  
AGGAACAAGAACGGACAAGTTTCAAGGAACCATCACTAGAAGCTCATTATGGGGCAGTGAAATCTGTGGGACACTTCTTC  
CTGTTTTATGCAATTTACATCATCTCATTTAACCTGTACCAAGCCGGAATAGCCAGCCCTAACTCCATAGAGGGATTGTT  
TTGCACTGTATTGACCGGATCTTATCCGTCGGTGCATTGCGTGCTGCTTCTTCTCAGAACACAAAACGCAACAAACCC  
TCATCAGTTTTTGGCAAAAATAGTTGCTATCATCATGCCAAAGTGAAGAAAGCAGAGTCTACTTCTACATGTAATACT  
GCATAG

>Xetr-T2R17

ATGTTGTTCTCCATCAAAGTGATCAAGATGACAATTGTTGTAGTAACTTGGCTATGTGGGTCCATCTTAAACTCATCTAT  
TGTAAGTGTGTATCTCAGAGAGTGGAAGAACGGAATGAGTCTTGGGGAGTGTGATCGGACCATTCTGACCATTGGGTGCA  
ACAATTTTTCTGCAGTGCTTTTTAACCTCCTATGAAATAATGGCTATTTTTGAGCTCTATGGGTGTTTCTAAAAGAA  
TTCAAAGTGGCAGGTTTGATATCTTCTTCTTTTTAATTATATCACCATGTGGCTCACTGCCTGCCTCTCCATCTGCTA  
CTGCGTAAAACTGGTCAGTTTTTACATGAAGTACTGATAAGATTGAAAAGGGGAATGTCCTCTGCAATCACTCTCTTCC  
TGCTTGGATCAGTGGTGCTTTCAGGCTTGATTAACGTTCCGTTCAATTGGACAATGGATACGGAATTTCTGGGAAATACG  
ACCTTAACAGCTGATAACGTTATCTACAAACCGGATCTCAAATTCCTGTGTTTCAACATTGTATCGGTTCTGTGTGCC  
CATTCTTGAACTTCTCTTTCTATTGGACTCAGTGTGATGCTCTTTCGGAGACATGTCCAGCAGATGAAGAACAACACTT  
CCCAGTCTGGACTCCGAGTTGAAGAGTCACGTGAGAGCTTGAGGACAATGTCCTTACTTTTGATTCTAAACCTGATT  
TTCTTCATCACATTTATTACCGTGGCCTTGGGTCTAACACAGTTCAAAGGTATACTTATTGGAGACATTTGTACTGGTC  
TGTGATTATGTCAGTCCCTCGATTGAAGCCGCTCTGCTAATCCTTGAAATACCAAGCTTAAACAGCTTTTTCAAAGA  
TTTGCTTTTGA

>Xetr-T2R18p

ATGCTGTGCGGCGTCACGGTGATCAAGACGGTGATACTGATCGTAACATGGCCATGGGGACCATCCTGAACTCATCCATT  
ATAGCTGTCTATTTCCAGCGACTGGAAGGAAGGGAGTGAAACTTGGGGAGTGGCATCAGATCAGTCTCAGTATGGGGTGC  
ACCAACCTGCTCTTGCAGTGCTTAATAACATTGGGAGCGGCCCTCGTCTCATATGGACTGTACCTTCCATTTGCGAAAAA  
AGTTTTTTTTACTTTCTACACTGTTTTCTTGTTTTTTAATTCTCTCTCATTTTGGCTCACAGCCTGTCTCTCCATCTGTT  
ACTGCCTGCGACTGGTCAATCTCTCCCTAAATTGTTTATTGTTTAAAAAGGAGACTCTCTCGCACCCTGCGCCCACTC  
CTTCTGTGGTCAGTGGCAATTTCAATTGCTTCTATTCTTCCAGTTATCTGGATATCAGACACAGAACTGACCAGAATAC  
AACTTTAATTTATTATGATAATACCTCTATTGCTAATTGGAGTTTTTTGGTCACTGCTTTTGATTTGGCATCGGCCTGC  
CCTCCCTTATTACTGCTATTTGTATTGACTTTCCTGATATCGCTCCTGAGGCACATCTGGAGGATGAAGCAGAACCCT  
CAGTTCGGGAGTCTCAGCTGAAGAACCCTATAAGAGCTTGAGGACAATGTTCTACTCATGGCTCTGAATTTGGCTTTA  
CTTTCTGATCATTTTCAGTTGAGTGTAAATCAATAGCATGGACACTATATGGGACATGGTGCTCTTGTAGGGAATG  
TGTTGAAACCCTCATGTCAAGCCATTGTTCTGATCTTTGAAATTCAGTTACTCAGTGCTTGATAAAGACCTTGTTT  
CCTCAGTGATGGCATCATG

>Xetr-T2R19

ATGCTCACTCACTATGGAAGTGATAAAGATAACAATTATTATAGTGACTTGGCTATGTGGGTCCATCTTAAACTCATCTAT  
TGTAAGTGTGTATCTCAGAGACTGGAAGAAATGGAATGAGCCTTGGGGAGTGTGATCGGACCATTCTGAGCATGGGGTGC  
ACAACCTACTCCTCAGGCGCTGTCTGTCCTGAGTGAATTCATTAATTTTTCAACTGTACAGTTGTTCTTCAAAGAG  
TTCATGTGTTGGGTTGCATATTATTCTATTTTTGAGTTATCTCTCCATGTGGCTCACTGTCTGCCTCTCCATTTGCTA  
CTGTGTGAAGCTGGCCAATATCTCACATGGATTGTTTGTAGATTAAAAAGGGGAATCTCTACTGCAAGTACTCTCTTCC  
TATTTGGATCAGTGGTGGCTTCATGCTTGATTAACGTCCTTCAATTTGGACAATGGATACAGAATTCCTGGAGAATACC  
ACAGCTGATAACGTCATCTACAACTGGATATTAATTCATGTCTTCAACATTGTCTTTGGTTGCTGTGTGCCGATTCT

TGTAACCTCTCTTTGATTGGACTCAGTGTGATGTCCCTCCTAAGACATGTTTCAGAGGATGAAGAACAACACTTCTCCGT  
CCTGGAACTCCTCAGTTGAAGAGTCACGAGAGAGCTTGCAGGACAATGTCCTTGGTTTTGATTCTCAACTTGACGTTCTCT  
GTGACAATCATTACTTTGGCCATGGGTCTAATGAACCACAAGGATGTCCTCGTTAATGATATATTATACTGGTCTGTTGT  
TTTGACAAATCCCTCGCGGCTGCCATCGTTCTGATCTTTGAAACACCAAGCTGAAGACGGCCTTGTCAAAGATCTGTT  
GTTGA

>Xetr-T2R20

ATGATGTCGGTGGTCATGACGGTGATACTGATTGTAACATGGCCATGTGGGACTATCCTGAACTCATCCATTATAGCTGT  
CTATCTCAGCGACTGGAAGAAGGGAGTGAACTTGGGGAGTGCATCAGATCAGTCTCAGCTTGGGGTGACCAACATTTC  
TCTTGCACTGCTTCAACAATTTGGAGTGGCATCCATATCATATGGACTATGCTTCCGCTTATCGAAAAAGTCTGTTTA  
GTGGTCTTCACTGTGCTCTGGTTTCCTGTTTATCTCTCATTTTGGCTCACTGCCGCTCTCCATCTGCTACTGCCTGAG  
ACTGGTCAATCTGTACCTAAATTTCTGCATTCCGTTAAAAAGGAGACTCTCTCATATTGTTCCCCCACTACTTGTGTGGT  
CAGTGGCAATTTTCATCTATTATTATGGTTCCAATGAACTGGACTATAGCAACTGACCAGAATACAACAATGATGTATTAT  
AATATTTCTGTTAATGTTGTTTACTTGATCCTTGAAGTGCATTGGTATCTGCCTGCCCTCCATTGTTACCTCTATTG  
TATTGTACTTTCCCTGATATCGCTCCTGAGGCACATCCGGAGAATGAAGCAAAACACTCAGTTTCGGGAGTCCTAAGCTGA  
AGAACCTTATAAGAGCTTGCAGGACAATGTTCTACTCATGGCTCTGAATTTTCTTTTTTCTGATAATTTTATGTTCA  
ATGGTACCGCATATAGTGGGACACAATATGGCAAACTGTGATGTTTTCATGTGTCATGTTAAACCCCTCAGGTCAAGC  
CGTTGTTCTGATCTTTGAAATTCAGTTACTCAGTGCCTGGTCTATAACCTTAGTTCTCAGGGATAG

>Xetr-T2R21

ATGCTGTCGGCACTCCAGGTGATCAGGGCGGTGATGCTCATTGTAACATGGCCATGTGGGACCATACTGAACTCATCCAT  
TATAGCTGTCTATCTCAGCGACTGGAAGAAGGGAGTGAACTTGGGGAGTGCATCAGATCAGTCTCAGTATGGGGTGCA  
CCAACCTGCTCTTGCACTGCTTCGTAACGCTTGGAGTGGCCTTCTCTCATATGGACTCCACCTGCCGTTTGCAGTACAA  
GTCTCATTTACCGTTGGCCACATTTACTTGTTTTTGTCTCTCATTTTGGCTCACAGCCAGTCTCTCCACCTGCTA  
CTGCCGTGAGACTGGTCAATCCGTTACCTAAATGCTTTATTTCAGTTAAAAAGGAGACTCTCTCGCATTGTTACCCCACTCC  
TTGTGTGGTCAGTGGCAATTTTCATCTATTACTACGGTTCCAATGAACTGGACATTAGCCATAGCAACTGACCAGAATATA  
ACAACGATGTCTTATAATTTCTGTTAATGTTGTTCACTTGATTTTTGAACTGCATTTGGCATCGGCCTGCCCTCCAT  
TATTACCTCTATTTGATTCTACTTTCCCTGATATCGCTCCTGAGGCACATCCGGAGAATGAAGCAGAACCCCTCAGTTG  
GGAGTCTCAGCTGAAGAACCTTATAAGAGCTTGCAGGACAATGTTCTACTCATGGCTCTGAATTTGCTCTTTTCTCTG  
GTAATTTTGAGTTTACGCGCTACCCCCATATAGTGGGAATACTTTATGGCAAACTGTGATTTATTATGCGTCATGTTAAC  
CCCCTCAGGTCAAGCCACTGTTCTGATCTTTGAAATTCAGGTAAGTACTCAGTGCCTGGTCAAAAACCTTAGTTCTCAGG  
GATAG

>Xetr-T2R22

ATGTTGTTCTTTATAAATGTGATCAAGATAACATATCTTATAGTAACTTGGCTATGTGGGTCCATCTTAAACTCATCTAT  
TGTAGCTGTGTATCTCAGAGAGTGAAGAATGGAATGAGCCTTGGTGAGTGTGATCGGACCATTCTGACCATGGGGTGCA  
ACAACCTATTCCTACAGTGCTTTTAAACCATGAATGAAGTCATTACTATTTTGAAGTGTACGGGTGTTTCTTAAAGAG  
TTCACCTAGTTGGTTGTATTTGACTTCTTTTGTGCTACGTCTCTATGTGGCTCACTGCCTGGCTTCCATTTGCTA  
CTACGTGAAACTAGTCAACTTTTACATCGATTGTTAATTAGGTTTAAAGAACAAATCCCTCTGCAAGTGCTCCTTTCC  
TCTTCGGATCAGTGGTGGGTTGATGCTTGATTAATGTTCCCTTCATTTGGACAATGGATACGGAATTTCTGCAAAATACC  
ACCGTATCGGCTGAAACTTTCTCTTCAAATGGATCTTAGATTCATGTCTTTCAACGTTGTTATTGGTTCCTGTGTGCC  
TGTCTTGTACCTCTGTTTGTATGGGATTTAGTGTGATGTCCCTTCTGAGACATGTCCAGAGGATGAAGAACAACACTT  
CTCAGTCTGGAATCCTCAGTCGAAGGCCATGTCCGAGCTTGAGAACAATGTCCCTCTGATGATTATGAACCTTGATT  
TTCTTTTGGCAGTTATTACTGTGGCATGGGTCTTACAAAATCAATGCCATCATTGCTAGACGTATAATATACTGGTT  
AGTTGTTATGGCAAGTCCCTCAGCCGAAGCCATCATTCTGATCCTTGGAAATACCAAGCTAAAAATGGCCTTGCCAAAGA  
TCTGTTTTTGA

>Xetr-T2R23

ATGCTGTGAGAACTCCACTTGATTTTCGGCATTGCTCTTGTCTATCATGGATATGTGGGACCGTCTTAAACTCATCCAT  
TGTAGCCGTGTATCTCAGTGACTGGAAGAAGGGATTAAACCTTGGTGCTGCAATCAAATCATTCTCACCATGGGGTGCA  
CCAACCTACTCCTGCAGAGCTTCTTAAACATTTTCATCTGATGTTTCATAACTTATCAGTTCTCCGTTCTGCTTGACAAAGAA  
TTACTTTTACGAGCTGTCTTTTGGTTTACACTTTTCAATTTCTCTCATTTTGGCTCACTGCCTGGCTCAGCGGCTG  
CTACTGTGTGCAACTGTTCAACTCCTCCAACAGATTTCTTCACTTCTATTTAAAGAGAAAGTTTCTACTGTGGTTGCTACT  
GCCTACTGGGATCAGTGCTTACTCTGTTTCTGCTGAAATGCCATTATTTGGACAACGCATATAACAACAGACCAAAAT  
CAAACAAGCATTTATAGTATGATGGATGATAATTTGCACCTGTTTTATTTAACTTCACAATTTCTTGCTCCTTCCAAC  
TATTATAACGTCTCTTTGATTGGACTCAGTCTGATGTCCCTTCTGAAACACGTCCATAAGATGAAGCAGAATTTCTCCA  
AGTTTTGGAACCCCTCAGCTGAAAGCCATGTAAGGCTGAGGACAATGCTACTTCTGTTGGCTGTGAACCTTGATATTC  
TCTCTGACTGTTTTATTTCTCCAGCTGAAAGATAAGGCTGGAGTTAGTGGGATATATGTACCCTGGTTTATTTTGAT  
GTCAAATCCCTCAGGTAAAGCCATAATTCTCTCTTTGGAACTCCAGGTAGCAACTGCCTGGTCAAGTCTTGTGTTT  
CTCAGTAA

>Xetr-T2R24

ATGCTGTGAGAAATCCACTTGATTTTCGTCATTGCTCTTGTCTGTGATGGACATGTGGGACCGTCTGAACTCATCCAT  
TGTAGCCGTGTATCTCAGTGACTGGAAGAAGGGATTGAACCTCGGTGCTGCAATGGAATCATTCTGCCATGGGGTGCA  
CCAACCTACTCCTGCAGTGGTTTTTAAACATTCATCTGATGCTCTGACGTACCAATTATTCATTATTTTGGCAACCG  
TTACTTTTATCTGTTGTTTCTTTATAGTAACTTTCCGTTTCTCTCATTTTGGCTCACTGCCTGGCTCTCCGGCTA  
CTACTGTGTGCGACTGGTCAACTCCTCCAACAGATTTTTCATCCGATTTAAAGAGGAATGTCCATGGTGGTTACATACT  
GCCTACTGGGAACAGTGGTTACTCTGTTTATTCAAGTGCCGTTATTTGGAAAGTACACACTAACTCAACCAGAAT  
CTAACAAATATTTATAGTGCCTTCGACAATTATACTGAACCTGCTTCAGTTAATGCCACATTTGCGTGCTTCTCCCAAC  
TATTATAACTTCTTCTGATTGGACTCAGCCTGATCTCCCTTCTGAAACATATCTGGAGGTTGAAGCAGAATGCTTCTC

AGTTCTGGAACCTCAGCTGAAGAACCCTTTAAAGCCTGCAGGACAATGCTACTTCTTTTGACTGTGAACTTGATATTC  
TTTCTGGCTATTTCTATTTCTTTCCGTATAAGCTTGATGATCCTAGGCAATATGTAGCTTGGTTTATTATGTCGTCCAA  
TCCCTCAAGCCAAGCGTAATCTTTTGTGGCAACTCCAGGTTAGCAACTGCCTGGTCAAAGGCTTGTGTTTCTCATT  
AA

>Xetr-T2R25

ATGCTGGCAGCGTACACAGTGATTGTACAGTGATACTGATCGTAACATGGTTGTGTGGGACCATCCTCAACTCATCCAT  
TATAGCTGTCTATCTCAGCGACTGGAAGAAGGGAGTTAAATGTGGGAGTGCGATCAGATCACCTCAGCATGGGGTGCA  
ACTACCTACTCATGCAATGCTTCATAATATTTTTTTGGGCATTAGGTTCTATGGACTGGACCTTCCATTGCGAAAAA  
CTCTCTTTTGCTATCAGTACTGTGTTCTGGTTTTCTGTTTTCTTCATTTTGGCTCACAGCCAGTCTCTCCATCTGCTA  
CTGTCTCAGACTGGTCAATCTATCGTCCGAGTTTTTAATCAGATAAAAGGAAGACTCTCTCGCATTTTTATCCCTCTTC  
TTCTGTGGTCAGTGGCAATTTTCATTTATTTTTCCAGTTACCCGGATAGTTGACATAAAAATTGACCAGAACGGGACTTTT  
ATTTATCATGAAAATATCTCTAATGTGGGTATTCTGATCTCTGCTGTGCAATTAATGTCTGCCTGCCCTTCATTATTAC  
CTCCATTTGTATATTTCTTTCCCTGATATCGCTCCTGAGGCACATCTGGAGGATGAAGCAGAACACTCAGTTTGGGAGTC  
CTCAGCTGAAGAACCCTTATAAAAGCTTGCAGGACAATGTTCTTACTCATGGCTCTGAATTTGCTTTTCTTCTGATAATT  
TGCAGTTCTATGCTGATATCAGATAGAATGGAACTGTATGGGCAAGGTGGTCTTGTAGGGAACATGTTGAACCCCTC  
ATGTCAAGCCATTGTTCTGATCTTTGGGAATCCAAGTTACTCGGTGCCTGGATAAAGACCTTGTTCCTCAGTGATGGA  
ACAGGTACCAAAATTATAG

>Xetr-T2R26

ATGCTGTGAGCACTCCAGCTGATCAGGGCGGTGATGCTCATTGTAACATGGCCATGTGGGACCATCCTGAACTCATCCAT  
TATAGCTGTCTATCTCAGCGACTGGAAGAAGGGAGTGAACTTGGGAGTGCGATCAGATCTCTGTGAGTATGGGGTGCA  
CCAACCTGCTCTTGCAAGTCTTACACGCTTGGTGTGGCCTTCTCTCATATGGACTCCACCTGCCGTTTGGCGGACAA  
GTCTCTGTGCTATCGGTGCTGTGTTCTGGTTTTCCATTATCTCTCATTTTGGCTCACAGCCGGTCTCTCCGTCTGCTA  
CTGCCTGAGACTGGTCAATCCGTTACCTAAATACTTTATTTCAGTTAAAAAGGAGACTCTCTCGCATTTGTTACCCCACTTC  
TTCTGTGGTCAGTGGCAATTTTCATTTATTATGAGCGTTCCAATGTACGCATAGTAGGCATGGCAACTGACCAGAATACA  
ACAACAAATTATTATTCTATGATTTCCAATGTTATTGATGTTTACAAAATCTTGGTGGTGCATTTGGCATGGGCTTGCC  
CACCTTATTACCTCTGTTTGCATTCTACTTTCCCTGATATCGCTCCTGAGGCACATCCGTAGAATGAAGCAGAAACCTC  
AGTTCCGGGAGTCCCTCAGCTGAAGAACCCTTATAGGAGCTTGCAGGACAATGTTCTTACTCATGGCTCTGAATCTTTTTCC  
TTCCTAATAATTTTCAGTTCAGTACTATCTCCATTTAATGTGGAACATATATGGGAGACTGTGGTTTTTTCATGTTTCAT  
GTTAAACCTTCTATGTGAAGCCATTGTTCTGATCTCTGGAAATCCAAGTTGCTCAGGACCTGGTTAAATCCTTAGCTC  
CTCAGGGATAG

>Xetr-T2R27p

ATGCTGTCTGCCATTGAGATAATAAAAAAATTATTCTGGTTATAACCGGACCATGTGGATTATCCTAAACTCATGGAT  
TGAGCTGTGCATCTCAGCCATTGGAAGAAGGGAGTGAGCCTTGGGACTGTGATCAAAATCATTCTCATCAAAGGGTGCA  
CCAACGTTCTCCTCCAGTGCTCATTAAACGTTACCGGGACAGTCAGTGCTTTTCACTATATGAGTATGTTAAAAAAT  
TAGTGGCCTACGTGTTCTTCTCTCTGCTTCCCTCTGGTTTGGCTCACTGCCTGGCTCTCTATCTGCTACTGCTTG  
AGACTCGGCAACATTTTCATATTGGTTCTTATCGGCTTAAAAAAGAGAATCTCTCCGGGATTACCCAACTCCTTTTAGG  
AACAGTGGTGATCTTAAGCATAATTAATATTCAGATTTTGGACATTTAACATAAAAGCTCAGCAAAACACATCTATCG  
CCATATTGATGAATTATTTATCTTAGAACCGGATGTTAAATACCTGTCTTCAATGTTGCATTGGTTGCTGCCTGCCA  
AGTCTTATAAATTTCTGTGTATTGGACTCAGCCTAATGTCGCTTTTTTTTTTGGACATGTCCATAGGATGAAGCAGAA  
TCACCTCAGTCCTGGAGCGGGAAAAATGAAGACCCATGCAAGAGCCTGCATGACAATATTCTCCTTATGGCTCTGAAC  
TGTTTTTATTTTCAACGTTATTATTTTGGTTATATCACAATTCAGTTCGGAACTATTTGGAATACTCTCTCTGCTCA  
GCAATCATGGCAAGTCCCTCAGGCCAAGCCATCATTCTGTTCTTTGGGAATCAAAGTTACGGCCCGTTGGTTAAAGAC  
TTGTTTCTGA

>Xetr-T2R28p

ATGCTGTCTGCCATTGAGATAATAAGAACAAATTATTCTGATCATAACCGGACCATGTGGGATCGTCCTAAACTCATGTAT  
TGAGCTGTGCATCTCAGCCATTGGAAGAAGGGAGTGAGCCTTGGGACTGTGATCAAAATCATTCTCATCATGGGGTGCA  
CCAGCGTTCTCCTCCAGTGCTCATTAACTTTCAATGGGATAGCTGACAATTTTGAATATATGGGCATTTTGACAAGGAA  
ATCGTTTTTGTGAATGACATGTTCTTTTATTCTAAACTTTTTCTGGATTTGGCTCACTGCCTGGCTCGCTATCTGCTA  
CTGCTTGAGACTCGTCAACATTTTACATCGGTTCTTTATTGGCTTAAAAAAGAGAATCTCTTCTGGGGTTACCTGCTCC  
TGTTGGGAACAGCGGTGATTTTAGGCGTGATTAATATTCATTTTGGACACTGAACATCAAAGCAAAGCAAAACATA  
ACCTCCACCTTACCAGTTGACTTCCTATCTCTGACTCAGACATTAATACATGCTCTTCACTGCTGCATTTGGTTGCTG  
CCTGCCAACTCTTATAACTTCTCTCTGTATGGGACTCAGCTTAATGTCCCTTTTGAACATGTCCAGAAGATGAAGCAGA  
ATCACTCTCAGTCTGAGCGGGAAAAATGAAGACCCATGCAAGAGCCTGCATGACAATATTCTCCTTATGGCTCTCAAC  
TTGTTTTTTTTCTTGACAATTTTTCAGTATTATTCTATCAAAATTCAGATTGACAGTAATGGGAATACTCTCATCTTCT  
GTATAATCATGGCAAGTCCCTGGGCGCAAGTTCTCATTCTGTTGTTTGGAACTCAAAGTTACGGCTCTGATTTGTTAAAG  
ACTTGTCTCTGA

>Xetr-T2R29

ATGCTGTCTGCCATTGAGATAATAAAAAAATTATTCTGATCATAACCGGATCATGTGGGCTCATCCTAAACTCATGGAT  
TGAGCTGTGCATCTCAGCCATTGGAAGAAGGGAGTGAGCCTTGGGACTGTGATCAAAATCATTCTCATCATGGGGTGCA  
CCAACGTTCTCCTACAGTGCTTATTAACCTTTCAGTGGGATAAATATAATTTTTCAGCTTAATTACTATCTTAACAAGGAA  
TTCATGTATGTGACTTACATTGTCTTCTTTCTGACTTCCCTCTGGAACCTGGCTCACTGCCTGGCTCGCTATCTGCTA  
CTGCTTAAGACTCGGCAACATTTACATGAGGTCTTTGTTGGCTTAAAAAAGAGAATCTCTCTGGAATTACTCAACTCC  
TGTTGGGAACAGTGATCATTGTAGGCATGATTAATATTCATTTTGGACAACGCACATAAAAGCTAAGCAAAATACA  
ACTTCCACCTTTGTCTTTGAACAAGACATTACATACCTGTACTTTATTACTGGATTTTGTAGCTGCCTGCCAACTCTTAT  
AATCTCTCTGTATGGGACTCAGCTTAAAGTCCCTTTTGAACATGTCCATAGGATGAAGCAGAACTCACTCTCAGTCTT

GGAGCGGGAAATGAAGACCCATGCAAGAGCCTGTACGACAATATTCCTCCTTATGGTTCTGAAC TTGTTATTCTGCTTG  
ATGATGTTTATTAGTATTATAGGAACCAATATTCAAAATCTTTGGGATATTTTTCTGGTCTATAAAAAATAGCAAGTCC  
CTCAGGCCAAGCTCTCATTCTGTTGTTTGAAAATCAAAGTTACGGTCTGATTTGTTAAAGACTTGTTCTGA

>Xetr-T2R30

ATGGATGGAGTAACTAATCACAGCTGGAATAACTACTCAACTGACCGACTTGCGGACTCTGTGGTTGGGAATGATACAAC  
AATATCTCCAGTTCTACTCATAGTTATATCTGTTGTTGGAATAGTCATTAACATGTTTCATCTTGCTGTTAATTTTCATT  
CCTGGATAAAAGGGCAAAGCTTGAACCCAGTGACCTCTTAATTGTTACCCTGGCTTTCTCCAAC TTGGTCTTTTCTGTC  
ACAGCCGGTGTCTGGATCATATACTTTGGTTTCATCACTTATGGGGACTTCAAAGAATATCTATCATATTCTATCATGGT  
GTATGTGCTCTTCTGCAATTCCTGGCTCAGCACCTGCCTGTGTTTCTACTACTTTGTGAAAGTCAGTAAC TTAAACCTG  
GTTACCTGGCACGGCTCAAGTCCAAGATAAACACCCTGGTGCCAAGGCTAATATTGGGCGCTCAAGTGTCTCCATCTTG  
AACTCACTATTTTACATGTTGACATTTTTTAAAGTCAACAATGACAACCTCAACGCTTCTTTTTTGACAAACAAGGCTTC  
AAGTACTACTAATAACAGGATAGACGTTTTTACAATGCATTCTTCTGTTGGTCAATTGTTTGATTCTTTCTTCATTA  
TAGTGGTCACCACCAGCCTTATCATTGCCTCGCTCTACAAGCACACTCGTCGATGCAACGGAACGTAGGAGAGTTTGGT  
GGCCCCAGTCTGCATATTCTACAGAGCAGCACGTACAATGATATCTTTCTTATTATTATCTTTCTTTTACGTTTT  
ATCACTGGGGAATAGCATTTTTCTAAATAAGCACTTGTTAAACTGGGTAACTACATGTTGGGTTGTGCTTTCTCCCCGA  
CTCAGTCCATCGTTCTAATCATGGGGAACCTCAGGCTCAGGCAGACCTGTAGGAACATACTTAAGAGTTGTATGAAAATA  
TTAAGCAGAGAGACAACCTATATCCACTGTGGGCACCTAA

>Xetr-T2R31-partial

GCATGAACCCCAAGTGACCTCCTAATTGTTTCCCTGGCTTTCTCCAACATGGTCTTTTCTGTCACAGATGGAGTCTATACT  
ATATGCATCCTTGTTATCCCATTTGGTGACGTTGAAGATCAATTGTATCTGCTATATATTGTCATGGTGTATGTGCTCTT  
CTGCAATTCCTGGCTCAGCGCTGCCTGTGTTTCTACTACTTTTGAAAATCAGTAACGTTAAGCCTGGTTACCTGGCAC  
GACTCAAATCAAAGATCAACACCCTGGTACCAAGGCTAATACTGGTTGCTCAGGGGTTCTCCATCTTGAAC TCACTTTT  
TACATGCCGTGTGTTTTTAAAGAGAACGTTGAAAACCCCAACCACAGACACAAAAAATTACTACTTACAGAACAGATGA  
TTTTTATAATGTATTTTTCTTGCTGATCAATTGTTATATTCCTTCTGTTTATAGTGGTACCACCAGCCTTATCATTG  
CCTCGCTCTACAAGCACACTCGTCATATGCAACAGAACATGGGAGAGTTGGTGGCCCCAGCCTGAAGATT CATCAACGA  
GCAGCAGTACAATGACGTCTCTTCTTATTCTCTATCTTCTGTTTACGTTGTAGTACTTGGGTCTAGCTTACTTATAAA  
AAATGAGTTGTTGAGTTGGGTTTACTACTTGGTGGGTTGACCTTCTCCCCATTAGTCCATCATTCTAATTATGGGGA  
ACACCAGACTGAAGAAGACCTTTGTGAACATGCTAAACAGCTGTAGGAAAACATTTGGAGAAGAAGACAATGTAACCACT  
TAA

>Xetr-T2R32

ATGGATGGAGTAACTAATCACAGCTGGAATAACTACTCAACTGACCGACTTGCGGACTCTGTGGTTGTGAAAGATAACAAC  
AATATCTCCAGTTCTACTCATAGTTATATCTGTTGCTGGAATGCTCACTAACGTGTTTCATCTTGCTGTTAATTTTCATT  
CCTGGATAAAAGGCCAAAGCTTGAACCCAAGTGACCTCTTACTTGTACCCTGGCTTTCTCCAAC TTGGTCTTCCAGTC  
ACAGCCGGTGTCTGCACCATATACTTTGGTTTCATCAGTTGTTGGGTCATTAATGATTATCAGTTCTTTGTGCAAAC TTC  
TATCATGGTGTATGTGCTCTTGCCAATTCCTGGCTCAGCGCTGCCTGTGTTTCTTCTGCTTTGTGAAAGTCACTAACT  
TTAAACCTGGTTACCTGGCACGGCTCAAGTCCAAGATAAACACCCTGGTGCCAAGGCTAATATTGGGCGCTCAAGTGTTC  
TCCATCTTGAAC TCACTATTTTACATGTTGACATTTTTTAAAGTCAACAATGACAACCTCAACGCTTCTTTTTTGACAAA  
CAAGGCTTCAAGTACTACTAATAACAGGATAGACGTTTTTACAATGCATTCTTCTGTTGGTCAATTGTTTGATTCTT  
TCTTCATTATAGTGGTACCACCAGCCTTATCATTGCCTCGCTCTACAAGCACACTCGTCGATGCAACGGAACGTAGGA  
GAGTTTGGTGGCCCCAGTCTGCATATTCTACAGAGCAGCACGTACAATGATATCTTTTCTTATTATTATCTTTCTT  
TTACGTTTTATCACTGGGGAATAGCATTTTTCTAAATAAGCACTTGTTAAACTGGGTAACTACATGTTGGGTTGTGCTT  
TCTCCCCGACTCAGTCCATCGTTCTAATCATGGGGAACCTCAGGCTCAGGCAGACCTGTAGGAACATACTTAAGAGTTGT  
ATGAAAATATTAAGCAGAGAGACAACCTATATCCACTGTGGGCACCTAA

>Xetr-T2R33

ATGGATCTGTCCAGTAAAGTAACTTGTGTATTCTTTCTTTGCACCAATTCTGGCAGTCACTGCAGGAGCCTTCACTAA  
TGCCTATATTACTTTTGTGATTTTGTGATTATTTTAAAGCAAAAATGATGAGCTCAAGCAATAAAATATTACTTGCCC  
TGAGCTTGTCCAATGGTTATTTTCTTTTCTTTTATTTGTTGCTCAATTATTAGTTTGTGTGGCCCCACATTGGCCACA  
AACAATTACATCAAGGGCTGTATCCTGGCTGTGCTCATATTTGGCAATTTCTTCCACTGCTGGATAACAACCTGCTCTG  
TGTCTTCTACTTTGTGAAGATAATCAACTTCAGCTCTGGGCTTTTCGCTTGGTTTAAAGTTGAAGATCGACATCATTTGTC  
CGTGGCTCATACTGGTTTCAGAAGTGGTGTCTTGGGCTGTAGTTTCTTACTTTACTGCCCTCTGTTAATATCCAAGAA  
CCTTCATCAAACCTCTCAATGTTTTACTCACTCAACTCAACATCAGGAGCAACTGGCATCAGCGCTGACTTCATTAAGGT  
TACGTTCAATTGCTGTTTGTGTTCTTTGCTGATTATGATTGTTACTACGTTCCCTACTATTAGGACACTTATTGTCACA  
GTAGGAGAATGAAGAACACAGGGACATCTAGCAGTCTTGCTCCTCATCAAAGTGCAGTGTTTATGATGGCATGGCTCCTA  
TTTTTATATACCGTCTTTTTTGTGGTATTGTTTACAGGTTTTATTCAAAGTTTTACTCCACCAAGCTTTGCATATTGGAT  
GACTTATAACCTGATATATGTAGCAACATTAGTACAATCCGTTGTTCAAATCTAGGTAACCCCTAAACTAAAAGAAGCAA  
TTACAATATGTTGTTGTTTGTTCACAAAAGCTGGTAA

>Xetr-T2R34

ATGGATCCCTCCAGCAAACCTCAACATTGTGTATTCTTTTTACACCAAATGTGGCCACCATCGCGGGAGCCTTCACTAA  
TGCCTATATTACTTTGGTGATTTTGTTCGATTATTTTCAAACAAAAATAATGAGCGCCAGCAATAAGGTATTAGTTGCC  
TGAGCTTATCCAATGTTTACGTTTCTTATATTATCTGTTAACTCAATTATCAGTTTTTTTTGGCCCCAAATGTACGCA  
GAACCATACGTCAAGGGCTACATCCTTGCTCTGCTCATATTTGGAATTGCTTCATGTGCCTGGACTACTACCTGCCTCTG  
TGTCTTCTACTTTGTGAAGATAATCAACTTCAGCTCCAGGCTTCTTACTAGCTTCAAGATGAGGATCAACATCCTTGTT  
CGTGGCTCATACTGTTTTCAGAAGTGGTGTCTTGGGCTGCAGTTTCTTACTTTACTGCCCTATGCTAATAGCCTAGAA  
CCTTCATCAAACACCACATTGTTCTACTCAGTCAACTCAACATCAGGAGTAAGTGGCATCTACCTGGATTTATGAAGGT  
TACCTTTGTTGCTGTTTGTGTTCTTTGTTGATTATATTGTTACTACCTTCTTACCATTGGCTCGCTATATTGACACA

GTAGGAGAATGGAGAGTACAGGGACAACCTAACAGTGTGACTCCTCATCGAAGTGCAGTGTGTATGATAGCATGGCTCCTT  
CTTCTATATACTGTTATTTTTGTGGTCTGTTTTCATATTTTCTTCATCCTATCAGTCCACCAAGCTTTGGCTATTGGAT  
GAGTTATAACCTGATATATGATTTACTTTGGTGAATCTGCGTTCTAATTCAGGTAACCCCTAACTGAAGGAAGCAT  
TTGCAAGATATTTCAATGGTTTCTGTTCCATGAAAAAGGCTACCTAG

>Xetr-T2R35

ATGGATTTATCTAGGATACTAAAAATTGTGTTTCAGCTTCCACAAAACCTGGCTGACATGACAGGAGCCTTCACTAATGC  
CTATATCTCTTTTGTGATTTTGTCTGACTATTTTAAACACAAACGATGAGCACCAGCAATAAGATATTACTTGCCCTGA  
GCTTATCCAATGTTTTCTTTCTTATTTTATTCGTTTCCGCGGTGAGTGTCTTCTGGCCGGAGATATATGCAGATTAT  
TATGTCAAGGCTATATTTTGCAGTCTCTGTTTGGCATTGTCTCTCCGTCTGGAATACCACCTGTCTCTGTGTCTT  
CTACTTTTTGAAAAATAATCAACTTCGGCTCTGGCATTCTTGCTTCTTCAAGATAAAGATCAACGTCATGGTTCCATGGT  
TCATATTCTTTTCAAGCATTGTCTTTAGGCTGCAGTTTCATTACATTATTGCCTTCTGTCAATAGCCAGGATCTTCA  
TCAACACCTCATTGGTCTACTCACTCAACTCCACATCAGTAGATATTGCCAGCATCCCTGGATTCTGAAGGTTACCTT  
CATTGTTGCTTTTGTCCCTTTGCTGATTATGCTTGTCACTACCTTCTCTACAATGGGGTCACTTTATTTGCACAGTCGGA  
GAATGGAGAACACAGGGACATCTAGCAGTGTGGCCCTCATCGAAGTGTCTGTTTTATGATGGCATGGCTCCTTCTTTTA  
TATGCTGTTGTTTTGTTGCATTGTTTACGTATTTCTTCAAGCTCTTTGATTCAAAAAGCTTTGGATATTGGATAACTTA  
TATGCTGTTATATTCATTCACTTTAGTACAATCCATCGTTCTAATTCTGGGTAACCCCTAACTAAAAGAAGCAATAACTA  
TATGTTGCTGTTTATTTGCCACAAAAGTAACTAG

>Xetr-T2R36

ATGGTTGTGGACGTTACTACCATTTTCCAGCCCTATTTATAGCTGCATCCATTGTGGGAATGCTCACCAGCATCTTCAT  
CCTGTCTGTAACGTCCTATTCTCTGATAAAAGGCCAACGCTGAACCCAAGTGACCTCTTGATTATTTCTCTGGCCTTTT  
CCAACATGGCTCTTTGTTGTTTCAAAATTTGCCTTTTCCCTATGTTTATTTTCAAACTTGTTTGGTCTTCGAAGATCAA  
TTCTACGTGGAAGTTATCCTGTGGCGTATGTCTCTTCCAAATCCTGGCTCAGCGCCTGCCTATGTTTCTTCTACTT  
TGTGAAAGTCAGTAACTTCAAAACCAATTACCTGGCAGCGCTCAAGTCCAAGATAAACACCTTGGTGCCAAGGCTAATAC  
TGGGCGCTCAAGCGTTCTCCATCTTGAACCTCACTATTTTACATGTTGGGGTTTTTCAAGAGTGAAGACTGGAAATTCAACA  
CTTTCTCTTGACCAACCAGACTTCAGATATTACTGGTTACAGTATAAACATTTATTTTCAAGTTATTTTCTTGCTAAT  
GAATTGCTATATTCCATTCTCATTATAGTGGTCAACACAGCTTTATCATTGCCTCGCTCTACAAGCACATTTGTCATA  
TGCAAAAAACAGGGGGAGTTTGGTGGCCCGAGCTGAAAATCCATCACAGAACAGCACTTACAATGACCTTGCTCCTT  
ATTTTTATTTATTTCTTTTATTCTATAATACTGGGAACCAACTCTTTCTAACTACGGAGTTGATGATCTGGGTTTACGT  
CACGGCGGGTGTCTTTTTTCCCTATTCACTCCCTCATTCTAATCATGGGCAACTCTAGACTGAAGAAGACCTGTGTGA  
ACGTTTTTAGTAGCTGTAGAAAAATGACCAGTGACGGGGAAATGACGCTACTATATGCACCTAA

>Xetr-T2R37

ATGGATCTCCACAACTTTGGCTTAGTGTTCTGGTTTTTTTTACTGATCCTGGAGGTTATTATTGGAACACTCACAAATGC  
CTTCATCGTAGTGGTGCTTCTGCTCGGATACTTCAAAAAACAGACTATGAACGAAAGTGATAAAATATTAATAGCTCTGA  
GCATACCAATATTTGTTCTTCTGTCAGTTCTGCTGCAATTATGATATTGTTATGTGGCCTTGGATTTACAGCCAT  
AGTAATGCTACTTTCTGTATCTTCAGCCTGACCATTTTGGCACAATTTCAATGGTTTGGCTCACAGCCTGCCTTTGTGT  
CTTCTACTTCGTA AAAAATACTCAATTCAGCTCCGGGATCCTCCTTTGGGCTAAGATGAAGATCAGCAACTTCGTTCCAT  
GGTTGATATCTTCTCAGAAATGGTCTCCTTGTGCTGGACTTTCTTTACCATGTTGCCCTTAGTCACCAAGGAACAATCT  
TCAGGAACATCTCATCTCTCCATTCACTCAACGCAACGTCGGACACAAATACCATCATCTTTGAACTGATATGCACTGC  
TGTTTTCTTTGCCCTGATGATCATTATAATCACTACTTTCTCTACTACTGGGTCACCTTTATTTGCACAGGCGAAGAATGG  
AGAAGAACTTGGGTGCTTCAAGCAGTCTGAAAGCTCATCAAAAGTGTTGTCTGGATGATGATACGCTCCTGCTTTTATAC  
ACACTTGATTTTGGGTACAAATTTCTCATTTTAGTGGTACCGTTGCCCATTAAGCTTTGAATATTGTCTCAATTACTT  
TATCTTATTTTCCATCCAGTAGCACAAATCCGTCCTTCTCATTCAAGGTAACCCCTAACTGAAGGACAAGCTGAAGCAAA  
TAAGCCTTGTTCACACAGCTGATGGGACAAAGTAA

>Xetr-T2R38

ATGGGTGATTTATACTCTTGGCAGTAGAGTTTGACGGGATATTCTCCAGCGTGTTTATAATATTTGTGAATGTCCAGTC  
CTGGATGAAGGGGCGAGAAGTAGATTCTAGGGATCAGATTATCATTGCCCTCTCCTTCTCAGACATGGTGTCTCTGCTG  
TGAATGCTGCCATCGTACTAGGCTCCGCTTTTGTCCCTCAGCTGCTGTCCGGTGGATTATATCTATTATGGGCTGTATGAT  
TTGATGACATATTCAATCTGTTTCCAACTCCTGGCTCAGTGCCTGTCTAGGCGCATTATTCTTTGTGAAAACCACTAAT  
TAATATTGGTTTCCTTGACAGCTTAAGATGAGGATTGAAATGGTCATGCTTGGGTAACATCAGGCATTGAAGTATTCT  
CCTTCATAATTGCACTGGTTCAACCTTCAGCTTCTGCGAGAATATGGCGAGAATTCTACACTTCCACTGATAACCAAT  
GAGACTTCCGAAGTTATCGGTTATGAGACAGATGTTCTCAATGATGTCTCATTCTTACTTAAAGCCTGTCTTACTCCATT  
CATGATCGTAACTGTCAACCTGCTCATATCAACATTTCTCTGCAAGCATACTCAACAAAACATGGACTCTGGTGGTC  
CGACTCTCAAAGTTCACCGAAGGGCTGCTTCTACGATGACATCTCTCCTCATACTCAACACTGTGTTTTATGTTTTACAA  
ATGTGGCTTGGGTTTCTTCAAACAGTGATCCTCTGTATAGGATTGGCATAACCCCTAGTTTGTCTTTTTCTTTAGTTCA  
GTCCATCATTCTAATCCTGGGATTGGCAGGCTGAAAAAGACCTTTATCCAGATAATAACCATGTGTAGAAGAAAGGCTT  
TGTCTTAG

>Xetr-T2R39p

ATGGATGGAGTAACATCACAGCTGGAATAACTACTCAACTGACCGACCTGCGGACTCTGTGGTTGTGAAAGATACAAC  
AATATCTCCAGTTCTACTCATAGTTATATCTGTTGCTGGAATGCTCACTAACGTGTTCTTGTCTGTTAATTTTCAAT  
CCTGGATAAAAGGCCAAAGCTTGAACCCAAGTGACCTCTTACTTGTTACCCTGGCTTCTCCAATTTGGTCTTCCAGTC  
ACAGCCGGTGCTGCACCATATCTTTGGTTTCATCAGTTGTGGGGTCATTAAATGATTATCAGTTCTTTGTGCAAACTTC  
TATCATGGTGTATGTGCTTGTCCAATTCCTGGCTCAGCGCCTGCCTGTGTTTCTTCTGCTTTGTGAAAGTCACTAACT  
TTAAGCCTGGTTACCTGGCACGGCTCAAGTCCAAGATAAACACCCTGGTG-CCAAGGCTGATACTGGGGGCTCAAGCGTT  
CTCCATCTTGAACCTATATTTTACATGGTGAATTTACCAATACCTTTTTTGACAAATGAGACTTCAAGTACTACTAA  
GGACAGTTTAGGCACCTTTTACAATGCATTTTCTTGCTCAATTGTAATATTCATTCTTATTATAGCGGGAACACCA

GCCTTATCATTGCCTCGCTCTACAAGCACACTCGTCGTATGCAACGGAACATGGGAGAGTTTGGTGGCCCCGGGCTGAAA  
ATTATCGAAGAGCAGCAGCTACAATGGCATCTTTCTTATTATTTATCTTTGTTATCATGGTTTATCACAGGGGAGTAT  
CATATTTCTAAGCAGGCAAGTGTGTACTGGGTTAACTTTGCGTTGGGTTGTGCTTTCTCCCTGACTCAGTCCATCGTTC  
TAATCACGGGGAACCTCAGGCTCGGGCAGACCTGTAGGAACATACTTCACAGGTGTATGAAAATATTAAGCAGAGAGGAA  
AATATATCCACTGTGGGCACCTAA

>Xetr-T2R40

ATGCTGCCGGCACTCCAGGTGATCTGGACGGTGATGCTCATTGTAACGTGGCCATGTGGGACCATCTGAACTCATCCAT  
TATAGCTGTCTATCTCAGCGACTGGAAGAAGGGAGTGAACTTGGGAGTGCGATCAGATCACTCTCAGTATGGGGTGCA  
CCAACCTGCTCTTGCAAGTCTTCATAACACTTGGAGTGGCCTTCAACTCATATGGACTCCACCTGCCGTTTGGCGTCTCT  
CTTGCTATCGGTGCTGTGCTCTTGTCTTCCATTTATTTCTCATTGTGGCTCACAGCCGGTCTCTCCGTCTGCTACTACCT  
GAGACTGGCCAATCCGTTACCTAAATCTTTCTTCAGTTAAAAAGGAGACTCTCTCGATTGTTACCCCACTTCTTCTGT  
GGTCAGTGGCAATTTCACTTACTGTTACTTTTTCAAATATCATATTGTACACAGGAACTAACCAGAACCTAACAATCCTT  
TATCATAATAAAGTCTAATGTAATGATGATTACAGCATCCCTGCTATTACATTTGGTATCAGCCTGCCCTCCATTAT  
TACCTCTATTTGTATTCTACTTTCCCTGATATCGCTCTTGAGGCACATCCGGAGAATGAAGCAGAACCTCAGGTCCGGGA  
GTCCTCAGCTGAAGAACCATATAAGAGCTTGACAGACAATGTTCTACTCATGACTCTGAATTTCTTTTTTCTGATC  
ATTTTTAGTTTTCAATGGTACCGCATATAGTGGGACACAATATGGCAAAGTGTGATGTTTTCATGTGTCATGTTAAACC  
CCTCAGGTCAAGCCGTTGTTCTGATCTTTGAAATTCCAAGTACTCAGTGCCTGGTCTATAACCTTAGTTCTCAGGGA  
TAGTATCATGA

>Xetr-T2R41

ATGTGGGAATCGACAACAAAACCTTGTGCTCAAAGCGTCTTCTACTTTTTGGACTGGCAGGAAACATGTTTATCCTGGT  
GATGAGTTTCACTGACTGGAGGAAGACTCATAGCTGGAATCCTTACGCTGTTATCACAATCAGTATTGGGATCTCTAACA  
TCCTGCTCCAACTACTACATTTCTAAATGAGTTCTTTGTTCTGCTGTTGACAAATGTTTCTGTGCAGGAAACAATGATT  
AAGTACTTTTATTGCCACCAGATATCTTTTTATAAACAGCCTGTTATTTTCCCTCTGCCTCTGCTTTTACTATTGCGT  
GAAGATCCTCCAATGAACCAACCGTTCTTCCGGAAGGTGAAGCAAGAGATTGCTAGAATAACCCCTGGTTTCTCTCAG  
TATCCATGCTGTATCTTTGGGCATTGGAATACCTCCTATTGGGACCTTCACTGGACTCTACCGGAGCTACAACTCA  
TCAGCAAGTTGGATACAAGTAAATGTGAAGCTCAGTAGAAGATACCAGTGGGCTTTTATTCTACAGATGCTGATCTCCTC  
AGGAGCTTTAATAGTCTTCTTCTGCCTGGCTGTCACAATTATCTTCTCCCTTGCAGACACATGAGGCGAATGAAACTCA  
ACAGTACTGGCTTCAATAAATCCAGCTTAGACGTCCATGTATCGGCTGCTAAACACTGACTTTGATCTTGCTTCTCCAT  
ATCTACTTCTTGGGCAGTATGTATCCTCTTCAACTCTCCGCTCACTTGGGGAACCTGGTTTTTAAATCTCAGTTACAT  
AATGGTGGCAGCTTTCCGTATTGGATTCTTTCATTCTCATCACTGGGAACCTACAGCTATGGAATTCTCAAAAAATA  
TATGTCTACTTTGTAGGATTTGCCATAAAATTCCTCAGGACAGGCATACGGTCCTTCATCTTGTCTGGTATCCATCCC  
CCTTTGGAGAGGGTGACAGAAGAACCAGTGTA

>Xetr-T2R42

ATGCGGTCTGCAGTGCAATGGTCATAATGGCGTTCGACTGCATCGCCTTGATAGTCGGAGGTCTGGGGACGTGGTTGT  
TTTAGCTCTGTGTCTCTAGAACGGTCAAGAAAACGTGCTCTGTCCGTACAGAGTCATCTCATTGAGCGTGAGCATCA  
GCAACCTCACCGCCATATTTCTCCAGCTGGCTTCAGATAATGAGCTGTTGCCGAACACGTTGCTCGTGGAAATATGTTGAT  
CTCTTATCAGTGTCAATTTCTATGCTCCAACCTGTGGTTTTGCACATTACTGTACGTGTACTACAGCATCAAGATTGGGGC  
CAGACGTTTAACTTTTTACAGTGGCTTAATGCAAAGTTTCTACAATCTTGCCATATCTGCTGTTTTCTTACTAACA  
TGTCTCTTTTGACCAGCTTCATATTTCTTCAACCTCTTGACAATCCCCAAACAACCTTTCTCAGTGCCTACCAAC  
TACGAAGAAGCATATTTGGAAAACCCATTTATTAAGTCAGGATTTACTCAATCCTTAATAGCGCTAATATGTTTCTGAT  
TTCTTTCATCTAGTGGGTCAAATCCTCCTCTCTGTATCGACATGTTGGCACGTGCAAAGCAATAATGAAGCCGCTG  
GGAACCTCAGCCTGAAGCTCATTTTAAAGCAGCCAAAACACTACCATTCTCCTGGTCTTCAATGTCACCTTTTTGT  
TCTATGATCACTACTTTACTCAGTCCATCTCCATCCATGCCCTTGGCGTAAGTTGCATCTTCATTGCCGCTCACTGTC  
AACCAGCGGTATATCTTAATCTGGGAAATACAAATATGAAGAAGCAAGCAAAAGAGACTTTTCTTCTGTTTTATGA  
ATGTTGCCAACTGA

>Xetr-T2R43

ATGCTGTCTGCCATTGAGATAATAAGAACAATTATTTCTGATCATAACCGGACCATGTGGGATCGTCTAAACTCATGTAT  
TGAGCTGTGCATCTCAGCCATTGGAAGAAGGGAGTGAGCCTTGGGACTGTGATCAAATCATTCTCATCATGGGGTCA  
CCAGCGTTCTCCTCAGTGCTCATTAACTTTCAATGGGATAGCTGACAATTTTGAATATATGGGCATTTTGACAAGGAA  
ATCGTTTTTGTGAATGACATGTTCTTATTTCTAAACTTTTTCTGGATTGGCTCACTGCCTGGCTCGCTATCTGCTA  
CTGCTTGAGACTCGTCAACATTTACATCGGTTCTTATTGGCTTAAAAAGAGAATCTTCTGGGGTTTCCCTGCTCC  
TGTTGGGAACAGCGGTGATTTTAGGCGTGATTAATATTCCAATTTTTGGACACTGAACATCAAAGCAAAGCAAAACATA  
ACCTCCACCTTACCAGTTGACTTCCTTATCTGACTCAGACATTAAATACCTGTCTTCACTGCTGCATTTGGTTGCTG  
CCTGCCAACTCTTATAACTTCTCTGTATGGGACTCAGCTTAATGTCCCTTTGAAACATGTCCAGAAGATGAAGCAGA  
ATCACTCTCAGTCTGGAGCGGGAAATGAAGCCCATGCAAGAGCCTGCATGACAATATTCCTCCTTATGGCTCTCAAC  
TTGTTTTTTTTCTTGACAATTTTAGTATTATCTATCAAAATTCGAGATTGAAAATAATTGGAATACTCTCATCTTCTG  
TATAATCATGGCAAGTCCCTCCGGTCAAGCTCTCATTCTGTTGTTTGAAACTCAAAGTTACGGTCTGATTTGTTAAAGA  
CTTGTCTCTGA

>Xetr-T2R44

ATGCTGCCTATTTTTTGTCTCTATGGCTATTTTGGGAGCTACCACTATATTGGGAATTGCCACAAACCTTGTAAAT  
TGATGTTGTGAATCTTGTGACAGGGTAAAGGGAAAAAGTCTTAACCCGTGACACCTCATCCTTGTACCCCTTGGCCTAT  
CAAACATGACTTTCCAGTTCAGCATGACTGCAAATGACTTCTTAAGCATTTTGTGGAGTGACCTTTACTTCTCAGATGCT  
GTTTATACAACCTTCATTACCCTGCTGCTTTTTCCCATCTTCTAGCTTTTGGTTTACTGTATGTCTATGTGCTACTA  
CTGCTTGAGATTGTCATATTCACCCATCCTTTCTGTGCAGCTAAAGCTTAAATCTCTCAACTTGTACCATTCTTC  
TTGCGACATCTGTCTTTATTTCTGTGGTTATTAGTATTCCTGGAATATGGAGCACCTACAGGGATCCCCCTATTTCAAAT

ATTTCAAACAATCAAAGCTTGGAAATGGAGCTACCCAAATTGAGCTTTACGTACTTGTTTTACAGCAATATTATTGGATG  
TTCACCTCCACTGGTGTTTGTGGGATTTCCAATTGTCTAATCCTTAAGTCACTGATAAGCAAGAGCACTATGTTTGAGA  
AAAACAAGAGTGATGTGTACAGCCCACGAACTGAGGCCAGAGAGCGAGCAGCAAGGACGGTCGGTTGCCTACTGTTACTA  
TACATGGCCTTCTATATCTCTGAGATCTTTATGTTTGTGATTTTTTCCACCCGGTAGCCCTGGATTTGTACCTGCTT  
AATGGTAATTTATAGTACCCACCTACACAATCAGTGATTCTAATTTTTGGTAGCCCCAACTAAAGAAAGCGTTGCTGA  
ACCTTCTCCATTTCTAAGATATGTGGCATGGAACAGATAGAGACTCCTAAGATTCTTTCAGTCAGCTTTTAA

>Xetr-T2R45

ATGCTGCCGTTTTCTTTTGCCTCTATGGCTATCTTGGGAGTTACCACTATGATGGGAATTTTACAAACTCTATAAT  
TGTAAGTCGTAATATTGTTGACAAGGTAAAGGGAAAAAGTTTTAATCCATCAGACCTCATTCTTGTACACTTGGCCTAT  
CCAATATCAGTTTCCAGTTCACAATGACTGCAAATGACTTCTTGATCATTTTTGTGGAGTGACTTATATTTCTCATCTGCA  
ATTTATGCTACTTTCAAAGTTTTGCTGTTTTCAACCATTTTTGCCAGTTTTTGGTTTACTGTTTGCCTTTGTGTCTACTA  
CTGCTTGAGATTGTCATATTACCCACCCCATCTTGTGCGTCTCAAACCTTGCACTCTCTCGACTTGTACCATATTTTC  
TTGACGCTTCTGTCTTTATTTCTGTGGTTATCAGTACTCCTGGAATATGGAGTACAAACAGTGACCCCCCATTTCAAAT  
TTAAACAAGCAATCAGAGTTTGGAAATTGAGGTACCCAAGCTGAGCCTTGATACCTGTTTTCCAGTAATATTATTGGATG  
TTCACCTCCACTGGTGCTAGTTGGGATTTCCAATTGTCTAATCCTTAAGTCACTCATAAGGAAGCGCGCCATGCTAGAAA  
AAAACAAGAGTGATGCCATAGCCCACGAACTGAGGCCAGAGAGCGAGCAGCAAGGACCGCTGGATGCCTATTATTACTT  
TACATGACCTTCTATATCTCTGAGATCTTTATGTTTGTGATTTTTTCCACCCAGTAGCCCTGGATTTGTACCTGCTT  
AATGATTATTTATGTTACCCACCTACACAGTCGGTCATTCTAATATTTGGCAGCCCCAACTAAAGAAAGCATTGCTGA  
ACCTTCTCCGTCTTCCAAAGAAATGCAATGAGTCAAAAAACAACCAAGATTCTTTTCATTAATTTTTGA

>Xetr-T2R46

ATGCTGCCTGTGTTTGCCTTGCCTCCGTGGTCATCTTGGGGGCTACCACAATAATGGGAATTGTCACAAATTCTCTAAT  
TGTAAGTTGTAATGTTGCAGACAAGATAAAGGGCAAAAGCTTTAATCCTTCGGACCTCATCCTTGTACACTCGGCATGT  
CGAATATCAGTTTCCAATTCACCATGACTGTAAATGACTTCTCAATCATTTTTGTGGAGTGACTTATATTTCTCAGATGCA  
GTTTTATGGTACTTTTAAAGCTTTGCTCTATTCAACCATTTTTGCCAGCTTTTGGTTTACTGTTTGCCTGTCTGTCTACTA  
CTGCTTGAGATTGTCATATTACCCATCCCTTTCTTGTGCGTCTCAAACCTTGAATGTCTCGACTTGTGCCATTTTTCC  
TGGGGGCTTCGGTGTTCACTCTTTAGTAATCAGTATTCAGCATTATGGAGCATCTACAAGGACCCCAAGATGGCAAT  
TTTTCAAGTAATCAGAGTTTGAATTTGAGTTACCAAGCTGAGTGCTGTCTACTGTTTTCCAGTAATATTATTGGATG  
TTCACCTCCATTGATGCTTGTGGGATTTCCAATAGTCTAATCCTTAAATCACTGATAAGCAAAAGCACCATGCTTGAGA  
AAAACAAGAGTGACGCTATAGTCCACGAACTGAGGCAAGAGAGCGAGCAGCAAGAACTGTTGGTTGCCTATTGTCTACTA  
TACATGGCCTTCTATATCTTTCAGATCTTGATGTTTATTAATTTTTTCCACCTAGTAGCCCTGGATTTGTACCTGCTT  
AATGGCTATTATGTCTACTCACCTTTGCACTCAATCATTCTCATTTTTTGGCAGCCCCAACTGAAGAAACATTGCTGA  
ACCTTCTCGGGTTTTTAAAGAAATGTGGCAATGAACAGAAGGAGACCCCAAGATTCTTTTTATCAAACCTTAGAGTTCAA  
AGAACAATAAAGTCAAGAAAGCTAA

>Xetr-T2R47

ATGCTCTCAGAACTCCACTTGATTTTCAGCATTGGTCTTGTTCTATCATGGATATGTGGGACCGTCCTAAACTCATCCAT  
TGTAAGCCGTGATCTCAGTGACTGGAAGAAGGGATTGAACCTTGGTGCTGCAATCAAATCATTCTCACCATGGGTTGCA  
CCAACCTACTCCTGCAGAGCTTCTTAACATTTCTATCTGATGTTTCACTTATCAGTTCTCCGTTCTGCTTGACAAAGAA  
TTACTTTTAGCCGCTGTCTCTTTTGGTTTACACTTTTCAATTTCTCTCATTTTTGGCTCACTGCCTGGCTCAGCGGCTA  
CTACTGTGTAAGAACTGGCAACTCCTCCAACAGATTCTTCATTGATTAAAAAGAGAAGTTTCTACTGTGGTTGCCTACT  
GCCTACTGGGAACAGTGCTTACTCTGTTTATTGCTGAAATGCCCGTTATTTGGACAACGCATATAATAACAGACCAAAAT  
CAAACAAGCATTTATTGTATTATGGATGATAATATTGCACTTGTTCATTTAACTTCACAATTTCTTGCTCCTTCCAAC  
TATTATGACGTCTTTTGTATTGGACTCAGCCTGATCTCCCTTCTGAAACACGTCCATAAGATGAAGCAGAATACTTCTC  
AGTTTTTGAACCCCTCAGCTGAAAGCCATGTAAAGGCCTGCAGGACAATGCTACTTCTGTTGGCTGTGAACCTGATATTC  
TCATTGGCTGTTTTATTTCTCTCCAGCCGACAGATAAGGCTGAAGTTATTGGGGTATATGTACCCTGTTTTATTTTGAT  
GTCATATCCCTCAGCTAAAGCCATAATTCTTCTCTTTGGTCAAAGTTCTTGTCTCAGTAAAAGGGTCATATGAATGG  
CATTTTTCTTACTGTAG

>Xetr-T2R48

ATGCTGTCGGCACTCCAGCTGATCAGGACGGTGATGCTCATTGTAACATGGCCATGTGGGACCATCCTGAACTCATCCAT  
TATAGCTGTCTATCTCAGCGACTGGAAGAAGGGAGTGAAACTTGGGGAGTGCGATCAGATCAGTCTCAGTATGGGGTGCA  
CCAACCTGCTCTTGAGTGCTTCTGAACGCTTGGAGTGCCCTTCTCTCATATGGACTCCACCTGCCGTTTGCCTCAAAA  
GTCTCTAGCTGTCCGTGCTGTGCTGCTGTTTATTGTTTTCTCTCATTTTTGGCTCACAGCCGGTCTCTCCGTCTGCTA  
CTGTCTGAGACTGGTCAATCCGTACCTAAATACTTTATTCAGTTAAAAAGGAGACTCTCTAGCATCATTACCCCACTTC  
TTCTGTGGTCAGTGGCCTTTTTATTTATTCTTACTGTTCCAATTAACATGATGGAAGGCATAGCAACAGACCAACAATACA  
ACAACAAATTATAATATTTCCAATACTGTTGCTGTTTACATGATCTTTGATGGTATACTTGGCATTGGCTTTCCACCCCT  
TATTACCTCTATTTGATTGTACTTTCCCTGATATCGCTCCTGAGGCACATCCGAGGATGAAGCAGAACAACCTCAGTTTG  
GGAGTCTCAGCTGAAGAACCTTATAGGAGCTTGCAAGACAATGTTCTACTCATGGCTCTGAATTTTATTTTCTTCTCTG  
GTAATTTCTGCGTATGATACTATCCCATATAATCCGGAACATATATGGCAAACTGTGGTGTTCATGCGTCATGTTAAC  
CCCCTCAGGCCAAGCCATTGTTCTGATCTTTGAAATTCCAAGTTACTCAGTGCCTGGTCTAAACCCGTAGCTCCTCAGG  
GATAG

>Xetr-T2R49

ATGCTGTCAGCACTCCAGCTGATCAGGGCGGTGATGCTCATTGTAACATGGCCATGTGGGACCATCCTGAACTCATCCAT  
TATAGCTGTCTATCTCAGCGACTGGAAGAAGGGAGTGAAACTTGGGGAGTGCGATCAGATCTCTGTCAGTATGGGGTGCA  
CCAACCTGCTCTTGAGTGCTTCTGAACGCTTGGAGTGCCCTTCTCTCATATGGACTCCACCTGCCGTTTGCCTCAAAA  
GTCTCTTTGCTGTCCGTGCTGTGCTGCTGTTTCTGTTTTCTCTCATTTTTGGCTCACAGCCGGTCTCTCCGTCTGCTA  
CTGCTGAGACTGGTCAATCCGTACCTAAATGCTTTATTCATTTAAAAAGGAGACTCTCTCGCATTGTTACCCCACTTC

TTCTGTGGTCAGTGGCAATTTTATTTATTATTACCGTTCCAATAAACGCCATAGTAGGCATGGCAACTGACCAGAATATA  
ACAACAAATGATCATTATATTATTTCCAGTGTTATTTTTATGATCCTTGATGGTGCAATTTGGCATTGGCTTTCCACCT  
TATTACCTCTATTTGCATTCTACTTTCCCTGATATCGCTCTGAGGCACATCCGGAGAATGAAGCAGAACCCTCAGTTCG  
GGAACACCCAGCAGAAGACCTTATAGGAGCTTGAGGACCATGATCCTACTCATGGCTCTGAATTTCTATTTTATTCCTG  
GTAATTTTGCCTTCAATGCTACCCCCATATAATGTGGAACTATATGGCAAACCTGTGATGTTTTCATGCGTCATGTTAAA  
CCCCTCAGGTCAAGCGTTGTTCTGATCTTTGAAATTTCAAGTTACTCAGTGCCTGGACGAAAACCTTAGTTCCTCCAGG  
GATAG

>Xetr-T2R50

ATGCTGTCTGCCATTGAGATAATAAAAAACAATTATTCTGATCATAACCGGATCATGTGGGCTCATCTAACTCATGGAT  
TGTAAGCTGTGCATCTCAGCCATTGGAAGAAGGGAGTGAGCCTTGGGGACTGTGATCAAATCATTCTCATCAAAGGGTCA  
CCAACGTTCTCCTCCAGTGCTTAGTAACCTTTCAATGGGATACTTATAAACTTTCAGCTGAATGACTATTTTGACAAGGAA  
TTCCTTTATGTGACTAACATTGTCTTCTTCTCTGACTTCCCTCTGGAACCTGGCTCACTGCCTGGCTCGCTATCTGCTA  
CTGCTTCAGACTCGGCAACATTTACATCGGGTCTTTATTGGCTTAAAAAGAGAATCTCCTCTGGAATTACTCAACTCC  
TGTTGGGAACAGTGGTCTGTTTTAGGCATGATTAGTATTCATATTTTTTGACAACGCACATAAAAGCTAAGCAAAACACA  
ACTTCCACCTCGGTCTTTGAACAAGACATTAATACCTGTACTTTATGACTGCATTTTGTGCTGCCTGCCAACTCTTAT  
AACTTCTCTCTGTATGGGACTCAGCTTAAAGTCCCTTTTGAACATGTCCATAGGATGAAGCAGAATCACTCTCAGTCT  
GGAGCGGGAAATGAAGACCCATGCAAGAGCCTGCATGACAATATTCCTCCTTATGGCTCTGAACCTGTTTTTCTTCTTG  
ATGATTTTTATTAGTGTTATATCAACCAATATTCTAAGTCTTTGGGATATTTTTTCTGGTCTATAATCATGGCAAGTCC  
CTCAGGCCAAGCTCTCATTCTGTTGTTTGGAAATCAAAGTTACGGTCTGATTTGCTAAAGACTTGTTTTCTGA

>Xetr-T2R51

ATGCTGGCAGCGTACACAGTGATTGTACAGTGATACTGATCGTAACATGGCCATGCGGGACCATCTCAACTCATCCAT  
TATAGCTGTCTATCTCAGCGACTGGAAGAAGGGAGTTAAATGTGGGGAGTGCGATCAGATCACCTCAGCATGGGGTGCA  
ACTACCTACTCATACAATGCTTCATAATAATTTTTTGGGCATTGAGTTCTATGGACTGGACCTTCCATTTGCAAAAAA  
CTCTCTTTTCTATCAATACTGGGTTCTGGTTTTCTGTTTCTCTCTCATTTTGGCTCACAGCCGATCTCTCCATCTGCTA  
CTGCCTGAGACTGGTCAATCTATCATCTGCCTTTTTAATCAGATAAAAAAGAACTCTCTCGCATTGTTACCCCTCTCC  
TTCTGTGGTCAGTGGGAATTTCAATTTATTTTCCAGTTACCCGGATATTTGCCATACAAATTGACCAGAACGAGACTTTT  
ATTAATCTTGAAAAATACCTCTAATGTTAATTTGGGTATTGTGATCCCTGCTGTTGCAATTAATGTCTGCCTGCCCTTCAT  
TATTACCTCCATTTGTATATTTCTTCTCTGATATCGCTCTGAGGCACATCCGGAGAATGAAGCAGAACCCTCAGTTCG  
GGAGTCTCAGCTGAAGAACCATATAGGAGCTTGAGGACAATGTTCTACTCATGGCTCTGAATTTTATTTTCTTCTCTG  
ATAATTTGCAAGTTCTATGCTGATATCAGATAGAATTGGAACATATGGGACATAGTGGTCTTGTAGGGGAAATGTTGAA  
CCCTCATGTCAAGCCGTTGTTCTGATCTTTGGGAATTTCAAGTTACTCGGTGCCTGGATAGACCTTGTTCCTCAGTGA  
TGGAACAATGTACCAAAATTATAGTACCATACATTTATTGTGATAAGGAACATTATATAGAGAAGTAA

>Xetr-T2R52

ATGGAATTTATGTTGAGTCTGTACTCACACCATATATCTGGTTGAAAACATTGCCGGGTTGGTGTGCAAGTGTGTTTAT  
CATTTGAGTGAATGCTATTGCTATATAAGAGGGCAAGGTTTGAACCTATCGACCAGATTATCGTCTGCCTACCTTTT  
ACGAGGCCATCTTCTGCTGCTCAATGGGGCTTCCATCCTCTGCTCTGTTCTTCTCCAAACGCAACCTCTGTGGACAAA  
ATCCTCAGCTGTATCTCGATTTTCTCAGTACTCTCATGCGCTTGGTTCAACGCTTGTCTGTGTTGCTACTTCTTTGTCAA  
AATCTGTGACCACAACTTGGCTTCTTGGCCAGCTCAAGAGGAACATTGACCCCTGATGCCAGGATCATTTTGGCCA  
TTCATTTTCTACCATCGCTAGCACCTTAGTTACAGTTTGAGTTCTAATGGAGTATACAGGCCAATACTACAGTCCCA  
GCCTTGCAAGAAGTCTTCTTTACTTATAGTGGGGAATGTCTCCATTGCTTTTGTGTTTATCAACTGCGGTAT  
TCCCACCTGATTGTAACAGTACCACAGCCCATATCATCGTGTCTCTGTGCAAGCACACTCGTCATATGCAGGAGAATG  
TGGGGGACGCTGGTGGCCCCAACCTGAAGGTTCTCCGAAGAGCTGCTTATACCATGATATGTCTCCTTATATTTTATATT  
ATAGCCTGTGCTGTATTAATAATTGTCTTGTATCTCAGGACCAAGGTTACATTACATCAATTATCTGATGGGTATGCT  
TTTACCTCTGCAGAGGGCGCCATTTAATCCTTGAAACAACAGACTGAGGGGGCATGTTTACACATACTGCACAAGT  
ACAGGGCAAAAAGTAACCATGGAGGTGAAGGAGTAAGCACTACAGGAGCATCCCAACCTGCTTCGTGA

>Xetr-T2R53

ATGCTGACAGTATCGAAATATCTTGGGCGATCATCCTTATAATAACATGGCCATGTGGATTATCCTGAACTCATCGAT  
TGTAAGCGGTATCTCCGCACCAGGAAGAATGAAATGAAGCGTGGGGAGTGCGACAAAATCCTTCTGGCCATGGCTTGCT  
CCAATGTTCTCCTGCTGAGCATGATAGCATTTGATATGACCTTTGTTACCTATGGACTCTATATCATGTTTGCCAAAGAA  
TTCTCCTTGGCCATCAGCGTTATACTCTTCTTTCTATTCACTTCTCATTCTGGCTTACAGCCTGTCTGTCACTCTTCTA  
TTGCTGAGACTGGTCAACTTCTCACATCAAGTCTTGACTCATTTACAAAGAAGAATGTCGATAGTGGTTCCCTGTTCC  
TGCTGGCCTCACTTCTGATTTTATGCTTATTAATGTTCCATTAATCTGGATGGTCCAAATAGACACCAATCAAACTCT  
ACGAGTATTTATCAGGATTACATATTTTCAATATGATCGACTCTACATGATTTTTAACATTGTTTTTGGTAGCACTTTGCC  
TTTTGTTGTAACCTCTCTCTGCATTGGACTCTGCCTGATATCTTCTGAAGCACGTTTACAGATGAGACAGCACATTT  
CTCAGTACTGGAGTCCACAGTTGAAAAGCCATGTTAAGGCTTTCAGGACAATGTTGCTTCTTTTATTCTAAACCTGATT  
TTTTTCAACGTTTGGTAGCCTTTATCTAGTACAGAATAATCTTGAGCTGTATTCCAAGCTGTGCTTTGGTCTGCTAC  
CATGTTTATTTCCATCAGGGCAAGCCACTATTCTGATCTTTGAAATTTCAAGTTTGCAGACCTGGTCAAAGGCTTTGC  
CAATGTTTGGGTGATGTGATAGAAATGTTTAA

>Xetr-T2R54

ATGCTGGCAGCGTACACAGTGATTGTACAGTGATACTGATCGTAACATGGCCATGCGGGACCATCTCAACTCATCCAT  
TATAGCTGTCTATCTCAGCGACTGGAAGAAGGGAGTTAAATGTGGGGAGTGCGATCAGATCACCTCAGCATGGGGTGCA  
ACTACCTACTCATACAATGCTTCATAATAATTTTTTGGGCATTGAGTTCTATGGACTGGACCTTCCATTTGCAAAAAA  
CTCACTTTTGTATCAATACTGGGTTCTGGTTTTCTGTTCTCTCATTTTGGCTCACAGCCGATCTCTCCATCTGCTA  
CTGCCTGAGACTGGTCAATCTATCATCTGCCTTTTTAATCAGATAAAAAAGAACTCTCTCGCATTGTTACCCCTCTCC  
TTCTGTGGTCAGTGGGAATTTCAATTTATTTTCCAGTTACCCGGATATTTGCCATACAAATTGACCAGAACGAGACTTTT

ATGGAACGGCGGAATATAGATGTGGAACGCTGGCTCTACCAGCTCATCATGTTCCCTCTCAGTGGGATCAACTTCTTTT  
AAACATCTTCTACATCCACTGTCTGATCTCCAACAGACAAAAGCTCAGGCAGCCTTTGAAGCTGCTGCTGTGCTTCTCA  
TCGGCTGCTCGCCACCTTTAGCATCCATTTAGCTCTCTGGAGTCGATATTGGTCGAAATGGACGGCTCCAGCATCCCC  
CACCATTTTTTTGGATGCTGATAATATTCTTCAGCAGCAGCATGACGTGTTGGGGTGGATGAGCATCTACGCTTA

CGTTAAGGTCGTCCTTCCAAGAGAGCTCTTTTGATCTGGATCAAGAGGAACATCAAGTCCGTGGTCTACCTGTTTTTTT  
TCAGCCAAGAAACGCTGATCATCTTCGAAGCTTCCCTGAAAATTTCCACCTTGGTCTGGAGTATAGGATTATTGAGGGG  
GCCAACTCTACGAGCAATGGCCTCCGCGACAGTGGACTCGAGGTCGGCAGCGCTGTCGTTCTCATCTTCTCAAAGTCCA  
CCTCTGAGCTGCATAGCCATGATAGGAATGTGTAACCTCTCCATGGCCACTACCTGCTCAAGCACATCAAAAGCATAA  
CCCGGAGGGGTTACCCACTCGGGAATTCACGATCAAATGCGAATCGTCATCTCTGAGTTCTTCCAGGGAGCGTTCTTC  
TTGATGTGCAGCATTCTGTACTTCATGGACACCTTCAGCTTCCAGTACTCCCGCATTTTTTCTTTGGTTCGTTGATGTC  
TCTCACGGTCACTTTACTGTACATGACAGGAACACGGCCAGTCTGTTTCATCGGTACAGTTATATTACAGGCAAGGGGCG  
TGGGGCTGTGGAAGTGGCTTACGGCACCTGCTGTGCAAATATTTGA

>Taru-2

ATGGAGGTTGCTTATATCATGAGGGTTAACATGAGTGCGATCGTCTCAACATTCTCATCAACGCGTTTACATCGCCTG  
CCTGGTGCGTCCGTTTCGAGGCGAAACGCCCAAACAGCCGCTGAAGCTCCTTCTCTGGACCATGCTCTGCTGCAACCTGT  
CTTTCAGGCGTCAGTCCAGGTTCTGTTCTTCTTTGTCAACGCCAGCATTGGGCTTATTGTATCCATTTTGGGGATTTTT  
ATCTTCAGTTTGTCCACCAGCATGACCACCACTGTTTGGTTGAACCTTCTTCTACTTCATCCAGATTGTGCCTTTGAAGAG  
CCCCGTCTTCTTTGGATGAAGAGGAATCATAAAGCCACCATCTACTGCATCTGGATGGTTGAGAAGCTAATAACTGGGA  
TAACTGTTACCAGCATTGTTATGTTTGATGTTTCTGTATTTAGTCAAATTTCTGATCTGATGTCGTTCAATGCCACGTTT  
AATAGCGATACCGTATTCAATAAATTACCTCCCACCTGATAAAGCTGGCTAAAGCCACAATGATCATGAATGAGGTCTA  
CTTCGTTATCTGCCTGTTTCATCATGTCGCTGCCAGCTTGCTCACTGCCATCTACCTCAGCAGACACTTGCCTCGAATGG  
CCTCCAAAGTGCGGTCTTGCTCCCTCTTCCGAAGCCAGGTGAGGGTCACTGTCACCGGCATCCTGCAGGGGGCGCTCTAC  
GTA CTGTTATCTACGTGGATTCTGTCCCACTATTTCTTCTATGACATTGCAGCCGGACCCGCTGCGTATATGACCTTAGC  
CAATATCACTGTCATCAACGTCTACATGATGGGCACCATTTGTAATCTGGGGGTGGGTGAGACCGTGTTCAGGCAGAGAG  
CTGTGGACCTGTGGCACAGAGCGGCACGGTCTGCACAACCATGAGAGCACAGCAGCCTCAAAGGGATGA

>Taru-3

ATGCTTGAATCAGATGATTTGAAGCTGTGTGGCATCGCTCTGTTCTTGTCTGGGAGTCCTCGCCAACCTTTTCAACCT  
GGGTGCAATGCTGGGGCAGCAGCAGGGGAGAACTGTGGCTGTCATTATTTGCTTCATCTCGCTGGGCAATATCCTGCTCC  
AGACCTCCACGTGTGCTTGTGGCTTCCATCAGGGCTGGGGTCTCTGCCGCCCTCACTTACCCTTCTTCTCAGCGGG  
GTTCTGTATGTTTGGTTCATCAGCAGCTCCGTGAGCATCTGGTCTGTTGCCTGGCTGAATGTCTTCTACTGTGTGAAGGT  
CTGTAGGTTCTCCTGGATTATCTGCAGAACCCTCGAGGAGAACATCTTAGCATCCTGAACATTACCATGGTGATAATGT  
TCCTGACCTCCTGCGTGATGTTACCCCTTTCTTCGGCCTCCACTTCCAAGACCAACACGTGAATGCGACAGAAATGGGT  
GCTTGTGTCATCAGGAAACCTCTGCTGCCAGCCTGGGTTGACATCAACACCTATGTGATCACTTTTATCTGCTTCCTCAC  
GCTGATGCCCTCCACCATCATGCTGCCACCTCACTAGGCCTGGTGGTCTACCTCTGCAGACGTACGGCGAAGACGCAGA  
GGAGCAGCTCAGCAGAGTCTACCTGCTGGTCTGCAGGCTGACAGTCGCTCTGGTTTGGGTTTACCTCACCACCTCTGCTC  
ATCATCTCGCTCTACTACTTCCATGCTCTCTCGCTTCAGGGCTGAGTGACAGCTGCTCTTCTCGGGCTTGCTCTTTTA  
TTGTGTGGCTTGTGCAGCGCTCCTCAGCTGCTCCAACAAACACTTGAGAGGGAAGTTGAGAGCGTTGCTCTGCAGAGGAA  
AGAGGACAAATACAATGGTCATTAATGCAGAAGGGGAGTAG
