# Supplementary figures and images for: Lineage-Specific Expansions and Contractions of the Bitter Taste Receptor Gene Repertoire in Vertebrates
Source: Oxford University Press journal article supplement (doi:10.1093/molbev/msj106), 2006-02-16

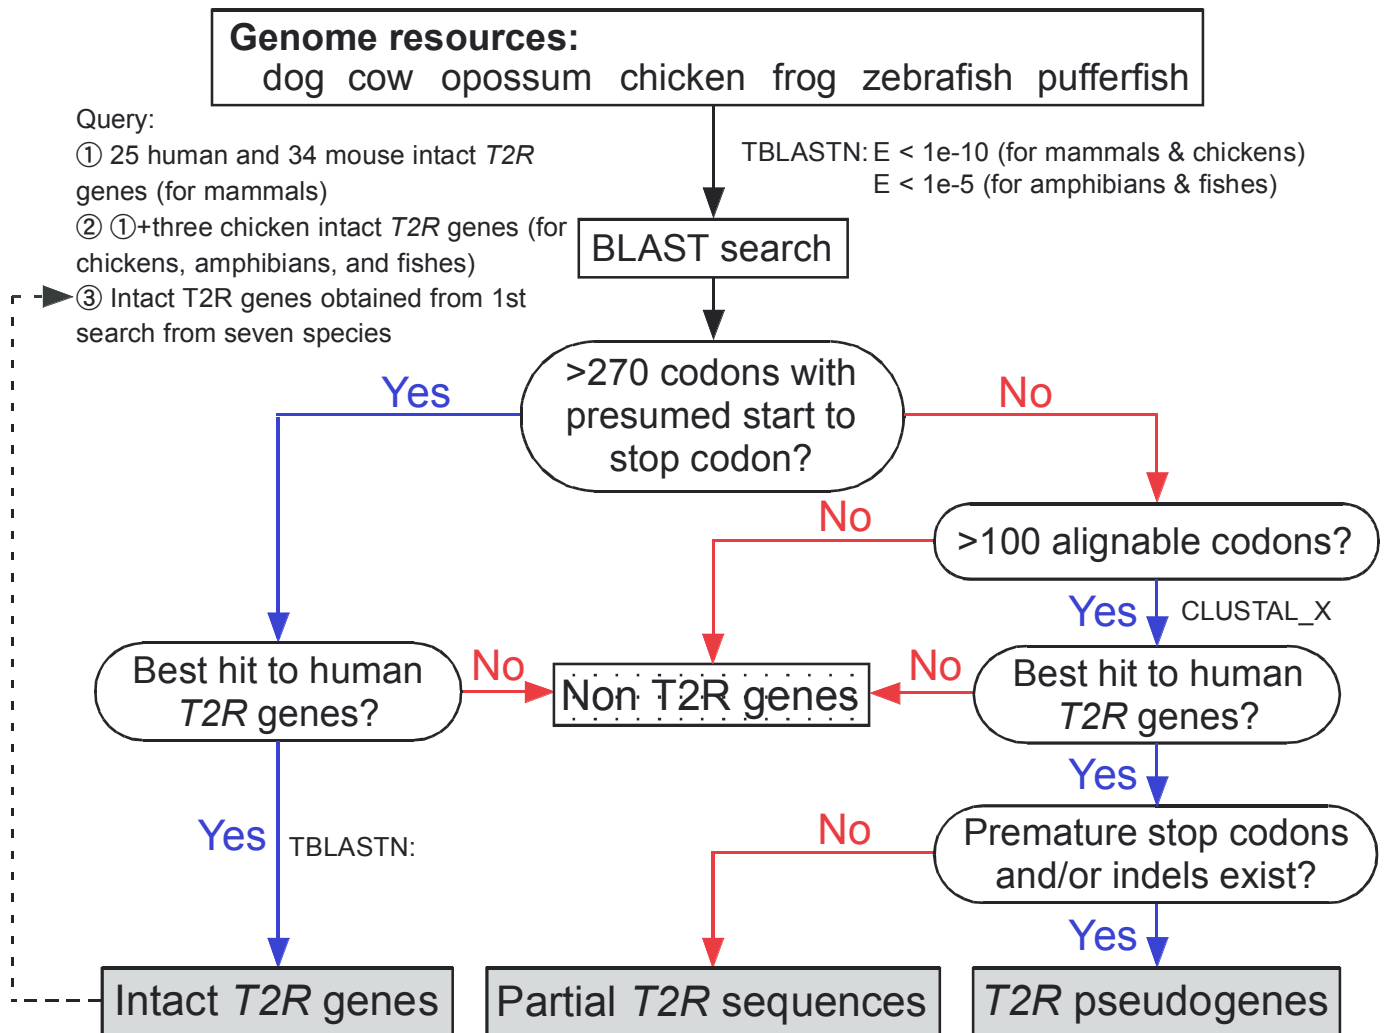

**Supplementary Figure 1**

Supplement: msj106_Supplementary_Data.zip [file msj106_Supplementary_Data.zip › msj106suppfig1.pdf]
